# Supplementary material for: Direct modulation of TRPM8 ion channels by rapamycin and analog macrolide immunosuppressants
Source: eLife. 2025 Sep 30;13:RP97341. doi: 10.7554/eLife.97341 (PMC12483518; doi:10.7554/eLife.97341)
Supplement: Figure 1—figure supplement 1—source data 1. [file elife-97341-fig1-figsupp1-data1.xlsx]

## Sheet: Fig 1-Fig Suppl 1A - room temp
concentration of Rapamycin (uM):	30	10	6	3	2	1	0.3
	0.41799	0.34992	0.24003	0.17221	0.11216	0.08156	0.01749
	0.46607	0.35418	0.25102	0.06677	0.05222	0.03304	0.01876
	0.43845	0.29926	0.23659	0.10296	0.07091	0.04665	0.02695
	0.40078	0.29634	0.2697	0.15321	0.08924	0.06363	0.02595

## Sheet: Fig 1-Fig Suppl 1B - 37 degrees
concentration of Rapamycin (uM):	30	10	6	3	2	1	0.3
	0.66129	0.23803	-0.03988	-0.06917	-0.06818	-0.09543	-0.04639
	0.5633	0.35156	-0.01609	-0.08307	-0.10286	-0.1259	-0.08899
	0.488	0.2024	0.02866	0.03906	-0.04636	-0.02876	-0.01105
	0.38201	0.16633	0.01805	-0.01287	0.03719	0.01344	0.07896
	0.42729	0.21344	0.01497	0.02119	0.04716	0.03142	0.02512
	0.40849	0.25767	0.10455	0.06689	0.07211	0.04282	0.04269
