# Supplementary material for: Direct modulation of TRPM8 ion channels by rapamycin and analog macrolide immunosuppressants
Source: eLife. 2025 Sep 30;13:RP97341. doi: 10.7554/eLife.97341 (PMC12483518; doi:10.7554/eLife.97341)
Supplement: Figure 1—figure supplement 2—source data 1. [file elife-97341-fig1-figsupp2-data1.xlsx]

## Sheet: Fig 1-Fig Suppl 2A
	time (min)	cell 01	cell 02	cell 03	cell 04	cell 05	cell 06	cell 07	cell 08	cell 09	cell 10	cell 11	cell 12	cell 13	cell 14	cell 15	cell 16	cell 17	cell 18	cell 19	cell 20	cell 21	cell 22	cell 23
	0.000166667	54.5982	56.2869	59.5937	52.428	66.0948	55.2581	61.0662	54.8726	82.7059	51.0016	67.4633	73.2246	54.8214	59.9981	40.6076	60.4119	40.7692	50.1062	54.4589	52.7513	61.5153	78.7266	54.8214
	0.0335	54.5506	55.9053	59.7971	52.1293	66.0948	55.2139	60.9082	55.1516	83.3691	50.8781	67.1625	73.3468	55.0138	60.0054	40.6917	60.1666	40.7692	50.2264	54.7122	52.7459	61.845	78.0647	55.0138
	0.06683	54.3435	56.1945	59.9751	52.0506	66.0116	55.6085	60.5476	54.6313	83.1973	50.9696	66.5767	73.402	55.1504	59.3657	40.757	60.0744	40.3753	50.3963	54.8822	52.7232	61.3856	77.9913	55.1504
	0.10017	54.0179	56.154	60.0648	51.7668	65.9626	55.9369	60.7382	55.0499	83.804	50.9696	65.2905	73.7952	55.5205	59.6572	40.8853	60.2544	40.1041	50.4766	55.0247	52.9022	61.1423	77.8857	55.5205
	0.1335	53.8124	57.2462	60.515	51.2391	65.9626	55.6903	61.169	55.6663	84.6629	51.2734	64.6463	74.1434	55.0092	59.863	40.9596	60.7877	40.4374	50.4766	55.0247	52.7964	60.4778	77.8857	55.0092
	0.16683	54.5682	57.3515	61.2887	50.9342	65.9374	55.8948	61.1523	56.0973	84.7307	51.3345	64.812	74.3885	55.1754	59.7813	41.2091	61.2001	40.5139	50.526	54.9471	52.7186	60.7989	78.0471	55.1754
	0.20017	53.9092	57.1133	62.1936	51.0183	65.9074	55.9025	61.7331	56.1071	84.7307	51.7331	64.9652	74.4201	54.759	59.7813	41.478	61.5323	40.5139	50.5894	54.9471	52.5982	60.6775	78.1804	54.759
	0.2335	54.3893	57.2404	63.1965	51.0183	65.9074	56.0294	61.7203	56.1726	85.1233	51.7331	65.5811	74.4843	54.759	59.7346	41.8933	62.0425	40.5139	50.7542	54.5401	52.2427	60.7419	78.3337	54.759
	0.26683	54.9308	57.0209	63.1304	51.1605	66.1635	56.4798	62.0121	56.0343	85.4074	52.2871	65.4351	74.5137	54.9671	59.9113	42.4479	62.2831	40.5022	50.7255	54.3841	52.0865	60.3707	78.4264	54.9671
	0.30017	55.5788	56.7573	63.2535	51.1605	66.2639	56.818	61.9848	55.8622	85.662	52.9722	64.2509	74.8412	54.9671	60.0383	42.8554	62.1319	40.4089	50.7166	54.2941	51.993	60.234	78.3064	54.9671
	0.3335	55.5553	56.626	63.8767	51.2791	66.2639	56.818	61.9381	55.7575	85.5317	53.3976	64.2509	74.8809	54.8238	60.1679	43.1633	62.2413	40.4089	50.6398	54.3442	52.0889	60.234	78.7023	54.8238
	0.36683	55.9143	56.5847	64.0627	51.363	66.3146	56.5562	61.9531	55.6767	85.6776	53.8478	64.2437	75.2407	54.9807	60.5572	43.6943	62.3364	40.174	50.8578	53.7609	52.1621	60.247	78.4564	54.9807
	0.40017	56.0029	56.4228	64.1757	51.8322	66.3879	56.3619	62.0585	55.9576	85.9298	54.4142	65.0715	75.3664	54.8934	60.3523	43.7948	62.3736	40.1919	50.5082	54.3442	52.3466	60.1851	78.3075	54.8934
	0.4335	55.9691	56.3833	64.4102	51.8322	66.412	56.482	62.0585	55.73	87.073	54.9933	65.0254	75.3309	54.5077	60.3763	43.9992	62.2638	40.4002	50.0593	53.8759	52.3466	60.3059	78.2531	54.5077
	0.46683	56.1328	55.9673	64.4843	51.8464	66.3289	56.7712	62.0585	55.8796	87.5865	55.9156	64.7298	75.3309	54.5135	60.5986	44.3589	61.6069	40.1799	49.8343	53.7991	52.1295	60.6325	78.3231	54.5135
	0.50017	56.2495	56.4862	64.4843	52.1967	66.4482	56.9274	61.9343	55.4868	87.6938	56.839	64.7298	74.8168	54.3102	60.8384	44.0766	60.6262	39.995	49.6896	53.7991	52.2621	60.2797	77.7767	54.3102
	0.5335	56.0163	56.3096	64.3287	52.2062	66.4854	56.9607	61.8291	55.6412	87.5613	57.6778	65.0497	75.0725	54.4977	60.7621	43.679	59.8403	39.9601	49.6017	53.9586	52.1827	60.2874	77.2996	54.4977
	0.56683	55.5592	56.2014	64.22	52.3683	66.4854	56.5266	61.8291	55.9859	87.6938	58.4203	64.1605	75.0172	54.3226	61.0958	43.6466	59.3721	39.949	49.1732	53.9586	52.087	60.2874	77.4099	54.3226
	0.60017	55.4138	56.0259	64.3073	52.5094	66.4854	56.0514	62.0654	56.1896	87.6938	58.6235	64.8834	75.0172	54.1429	60.7621	43.575	58.9815	39.9932	48.5651	53.882	51.9669	60.2874	77.0079	54.1429
	0.6335	54.827	56.1818	64.6535	52.4439	66.5885	55.8721	62.0905	56.3652	87.5613	58.8289	64.9509	74.5042	53.8435	60.6887	43.3569	58.7747	39.7593	48.4085	53.5237	51.9103	60.318	76.0899	53.8435
	0.66683	54.5957	56.5086	65.0268	52.377	66.6596	55.9124	62.1258	56.6076	87.7137	59.3561	64.4042	73.8847	53.8929	60.8036	43.0204	58.2294	39.8288	48.5948	53.2281	51.9673	60.0607	75.8562	53.8929
	0.70017	54.6369	56.1334	64.7799	52.377	66.5283	55.9124	62.1655	56.6196	86.8053	60.1485	64.1205	73.579	53.9151	60.7098	42.5349	57.8593	39.8642	48.5037	53.1902	51.9025	59.9838	75.8591	53.9151
	0.7335	54.4657	55.1861	64.7201	52.3391	66.3112	55.8721	62.1655	56.7376	86.558	61.0415	63.8353	73.3526	53.6225	60.7807	42.7608	57.6712	40.0864	48.7731	53.0172	51.6238	60.424	76.5288	53.6225
	0.76683	54.3634	55.2952	64.6531	52.056	66.2429	55.9191	62.6006	57.1181	85.8062	61.6169	63.8353	73.2659	53.6806	60.5318	42.8193	57.6984	39.8515	48.4495	52.8805	51.373	60.3455	76.5425	53.6806
	0.80017	53.8816	55.6768	64.5002	52.2361	65.7446	56.0758	62.7229	57.1423	85.5394	61.4176	63.9024	73.2329	54.0191	60.3033	42.5876	57.6816	39.8109	48.448	52.8789	51.4871	60.3455	77.1577	54.0191
	0.8335	53.7755	56.0797	64.2015	52.1442	65.403	56.5279	62.7229	57.35	85.1194	61.1775	63.4181	73.0139	54.087	60.2337	42.5876	57.6266	39.8035	48.2371	52.7886	51.3541	60.2525	77.5405	54.087
	0.86683	53.6938	56.2346	64.3364	51.9957	65.7982	57.0338	62.7906	57.5256	84.8059	61.572	63.4181	72.9481	53.9299	60.2337	42.4251	57.4563	39.886	48.0968	52.5867	51.4021	60.2525	77.4155	53.9299
	0.90017	54.103	56.249	64.729	52.1612	65.6438	57.1492	62.7379	57.654	84.8059	61.3637	63.6484	72.7459	54.1454	60.17	42.3047	57.3722	39.9303	48.0968	52.4835	51.2461	59.854	76.4693	54.1454
	0.9335	53.9364	56.2464	65.0565	51.8917	65.9051	57.205	62.5629	57.5994	84.6251	61.3637	63.6484	72.7398	54.1894	60.029	42.3047	57.3462	39.9303	48.2959	52.4835	51.2231	60.201	76.2021	54.1894
	0.96683	54.0939	55.9672	65.073	52.0121	65.7939	56.8962	62.539	57.5509	85.4572	61.3637	63.5999	72.7709	54.1894	59.5911	42.218	57.0588	39.9735	48.4532	52.5259	51.3228	59.6547	76.7589	54.1894
	1.00017	54.1918	55.3133	65.0858	52.2958	65.6735	56.8023	62.679	57.5554	84.4967	61.3209	63.3809	72.8508	53.9035	59.3133	41.7951	56.9097	39.9035	48.4279	52.2228	51.2231	59.7779	76.5433	53.9035
	1.0335	54.1163	55.8738	65.2074	52.0265	65.4597	56.9381	62.8142	57.4644	84.4979	61.3209	63.1826	72.8264	53.8405	59.4051	41.3898	56.7661	39.9733	48.3589	52.189	51.2608	59.268	75.9874	53.8405
	1.06683	53.9775	55.8738	65.6056	52.6797	65.5706	56.9627	62.9939	57.3062	83.8685	61.2532	63.0938	72.7875	54.1071	59.5279	41.4334	56.5255	40.0747	48.0574	52.297	51.309	58.6595	75.4671	54.1071
	1.10017	54.193	55.7491	65.8224	52.7458	65.5706	57.0359	62.4678	57.215	84.3063	61.2532	62.9347	72.7709	54.1753	59.6096	41.3898	56.3848	39.9539	48.2389	52.3016	51.4811	58.6968	75.7433	54.1753
	1.1335	54.4804	55.9084	66.5455	52.288	65.5856	57.0064	61.8822	56.8052	84.3063	61.5642	62.6247	72.634	54.06	59.3855	41.4334	56.0206	40.0213	48.1456	52.3367	51.4129	58.7169	74.9735	54.06
	1.16683	54.4804	55.5058	67.3117	51.6211	65.5856	56.9739	61.8316	56.4341	84.9199	61.875	62.9171	72.3787	54.1324	59.009	41.4334	55.1305	40.0213	47.9833	52.3544	51.5644	58.7478	74.7702	54.1324
	1.20017	54.4804	55.6362	67.546	51.6803	65.4488	57.0471	61.6773	56.0446	86.0567	61.72	63.1411	72.3612	54.1965	59.0029	41.4334	54.6789	40.1059	48.0693	52.4178	51.6164	58.4468	74.7702	54.1965
	1.2335	53.951	55.6362	67.6363	51.6803	65.3685	57.1021	61.9833	55.7441	86.6067	61.6167	62.3852	72.2572	54.3191	59.1223	41.4538	54.6789	40.1578	48.2066	52.4178	51.6164	58.4468	74.5579	54.3191
	1.26683	54.4804	55.6963	67.7937	51.7809	65.3685	57.0102	61.9524	55.5244	87.8582	61.522	61.8155	72.1856	54.8304	58.9248	41.5305	54.5912	39.9773	48.283	52.4178	51.7734	58.4468	74.8988	54.8304
	1.30017	54.7573	55.9032	67.8495	51.6105	65.4764	56.8308	62.0725	55.3063	88.0508	61.522	61.8155	72.1856	55.242	58.9768	41.7452	54.5244	40.081	48.0425	52.195	51.1609	58.8095	74.0429	55.242
	1.3335	54.9974	56.1691	68.0882	51.2506	65.2385	56.7042	61.9666	55.2598	88.6286	61.4779	62.0108	72.0567	55.6109	59.2443	41.727	54.8959	40.0352	47.9212	52.1589	51.0923	58.7702	74.797	55.6109
	1.36683	54.6311	56.2501	68.427	51.4096	65.559	56.8636	61.9666	54.8251	88.6286	61.3995	62.6103	72.0708	55.9947	59.4499	41.9277	55.6899	39.9301	47.6798	52.1589	51.4247	58.6655	75.7129	55.9947
	1.40017	55.4644	56.4714	68.8367	51.4096	65.559	56.8636	61.9666	54.6902	88.558	61.1797	62.2867	72.1126	55.9216	59.3749	41.6806	54.8959	39.8999	47.5232	52.1157	51.3246	58.491	75.7129	55.9216
	1.4335	55.5993	56.6655	68.5299	51.5697	65.4544	56.6639	61.9666	54.4119	88.1733	60.9048	62.1273	72.1126	55.973	59.4696	41.3915	55.7133	40.2083	47.4164	52.1975	50.7746	58.3169	75.9372	55.973
	1.46683	55.3567	56.6375	68.5632	51.7526	65.4493	56.6485	61.9219	54.3696	88.103	60.3466	61.8186	72.4589	55.8109	60.0444	41.2853	55.5651	40.2083	47.3257	52.3508	50.7746	58.1619	76.8008	55.8109
	1.50017	55.3567	56.6375	68.3602	52.0786	65.6018	56.4181	61.9219	54.5801	87.7506	60.3466	61.8186	72.5925	55.7737	60.5499	41.2564	55.9707	40.438	47.3174	52.3131	50.7628	58.3159	77.6587	55.7737
	1.5335	55.8324	56.8091	68.7782	52.0479	65.469	56.3341	62.0146	54.8729	87.3657	60.3604	61.7129	72.6637	55.7737	60.5499	41.4168	55.9707	40.1359	47.0985	52.2722	50.7113	58.2491	77.2429	55.7737
	1.56683	56.129	57.0609	69.2679	51.866	65.6259	56.3159	61.9765	54.803	86.9794	59.8373	61.9632	73.1137	55.528	60.5421	41.226	56.0036	39.9435	47.1264	52.3623	50.7665	57.701	77.806	55.528
	1.60017	56.2901	57.2497	69.3607	51.866	65.469	56.1177	62.0265	54.8815	86.4638	60.2489	62.4068	73.4528	55.528	60.5739	41.1024	56.2334	39.8908	47.0716	52.499	50.7526	57.1469	78.2268	55.528
	1.6335	56.2901	57.2497	69.4925	51.813	65.3903	55.3224	61.9497	54.3738	86.0827	60.7463	62.0429	73.2895	55.2741	60.389	40.9828	56.3328	39.5231	47.2867	52.3258	50.9838	57.1989	78.361	55.2741
	1.66683	55.4766	57.1555	69.2679	51.8776	65.4076	55.3184	61.6729	54.2889	85.0658	60.2634	62.1014	73.1569	55.2043	60.1503	41.0952	56.3328	39.5237	47.6898	52.1103	50.9789	57.1553	78.3786	55.2043
	1.70017	55.8449	57.0203	68.6716	51.7458	65.4076	55.2567	61.6444	54.8435	84.6049	60.2634	62.1014	73.3708	55.0276	59.8612	40.969	55.8553	39.4926	47.4731	52.2858	50.967	57.4996	77.4554	55.0276
	1.7335	55.3129	57.1109	68.4402	51.5459	65.4116	55.3864	61.6444	54.8435	84.211	60.1504	62.103	73.5262	54.9999	59.8122	41.084	55.8373	39.5006	47.6496	52.4164	50.9656	57.8857	78.4876	54.9999
	1.76683	54.6198	56.8171	68.4402	51.5459	65.5599	55.6712	61.6444	54.8686	84.4404	59.9701	62.1333	73.6025	54.7674	59.563	40.9732	55.0855	39.2577	47.8278	52.4164	50.9656	57.8701	78.2188	54.7674
	1.80017	55.0843	56.8422	68.1581	51.2693	65.5599	55.8682	61.4219	54.7645	84.0276	59.9958	61.8563	73.6711	54.7523	59.1892	40.9607	55.6533	39.27	48.0604	52.882	50.8863	57.4194	78.4469	54.7523
	1.8335	55.6748	56.9847	68.037	51.1798	65.3157	56.1541	61.1187	54.6634	83.9135	59.7951	61.9598	73.6735	54.5798	58.8834	40.9457	55.5862	39.3757	47.8185	52.2495	50.5954	56.8106	77.7088	54.5798
	1.86683	54.7892	56.5987	67.8341	51.0329	65.65	56.0527	60.8976	54.6634	83.3477	59.219	62.2443	73.7041	54.5831	58.7924	40.5845	55.8293	39.6027	47.6475	51.8899	50.3325	57.2369	77.8945	54.5831
	1.90017	54.815	57.042	67.2838	51.0715	65.3411	56.5123	61.1622	54.6634	82.8345	59.0774	62.5117	73.8463	54.5717	58.7924	40.5247	55.591	39.6105	47.6422	52.0995	50.513	57.7149	77.6459	54.5717
	1.9335	53.8789	56.592	67.0074	50.9875	65.3736	56.6921	60.8541	54.5938	83.3201	58.5127	62.8076	73.9313	54.4723	58.7847	40.3705	55.6238	39.7587	47.6157	52.209	50.4586	57.7149	77.4162	54.4723
	1.96683	53.8789	56.5484	66.5213	50.9998	65.746	56.9134	61.1187	54.504	84.54	57.8721	63.053	73.9441	54.4723	58.4748	40.5986	56.0348	39.7131	47.4597	52.5567	50.3497	57.4075	77.5502	54.4723
	2.00017	53.9348	56.7082	65.9531	51.1275	65.5777	56.9033	61.488	54.6668	84.6752	57.3322	63.0866	74.1608	54.4027	58.4748	40.5921	55.5508	39.6242	47.4118	52.7216	50.4532	57.4075	77.1394	54.4027
	2.0335	53.8137	56.5949	65.5968	50.9458	65.6062	57.0469	61.2432	54.3978	84.8712	57.1997	62.2775	74.2511	54.3577	58.8856	40.705	55.3923	39.5181	47.7703	52.546	50.4214	57.3527	77.071	54.3577
	2.06683	53.7653	56.5867	65.2147	50.8467	65.6062	56.9761	61.1307	54.008	85.0874	57.0549	63.0996	74.1395	53.6598	58.8988	40.705	56.0168	39.6317	47.9094	52.5548	50.4214	56.9254	77.071	53.6598
	2.10017	54.5544	56.6545	64.8415	50.7618	65.6814	56.6158	60.8032	53.8796	84.9181	57.1629	63.3965	74.1395	52.6875	58.6555	40.604	56.1451	39.6317	47.9738	52.6809	50.3944	57.1464	76.1434	52.6875
	2.1335	54.0157	56.6133	64.8184	50.8285	66.0507	56.5944	61.0633	53.7018	84.922	56.8547	63.3965	74.0869	52.5195	59.1636	40.705	56.5431	39.7606	48.1419	52.6688	50.373	57.3022	76.0183	52.5195
	2.16683	53.6965	56.4563	65.1168	50.8557	66.2353	56.532	61.1794	53.6194	84.7001	56.7387	62.9717	74.1405	53.3707	59.2468	41.0324	56.1564	39.4676	47.8434	52.8104	50.2238	57.3671	75.8546	53.3707
	2.20017	54.1782	56.4563	65.2734	50.9051	66.1722	56.7237	61.4636	53.4571	84.9201	56.9288	62.6212	74.0618	52.9404	59.4033	41.1085	56.124	39.4676	47.9092	52.9375	50.0709	57.4494	75.4999	52.9404
	2.2335	53.7798	56.5546	65.0762	50.854	66.1722	56.7481	61.1407	53.1828	86.2646	56.6839	62.6697	74.3563	52.783	58.9494	41.2452	56.3498	39.192	48.3274	52.9375	49.9019	57.2984	75.4999	52.783
	2.26683	53.4816	56.5205	64.0974	50.6747	66.1524	56.8065	61.523	53.1157	86.0099	56.6839	62.2603	74.0618	52.6629	59.0107	41.4171	56.3333	39.1748	48.2344	53.0639	49.8361	57.4494	75.9179	52.6629
	2.30017	53.8252	56.3146	63.5499	50.6228	66.1238	56.6609	61.4034	53.5164	86.3727	56.5774	62.4971	73.7104	52.6858	59.1151	41.5075	56.3333	39.3462	48.2422	52.9375	49.6324	57.5324	75.563	52.6858
	2.3335	54.1135	56.3146	63.9434	50.599	66.1555	56.777	60.905	53.1886	86.6844	56.3833	62.2025	73.7104	52.8015	59.0253	41.6265	56.8635	39.3222	48.1369	52.9717	49.6132	57.4889	75.276	52.8015
	2.36683	54.4822	56.4792	63.4731	50.9061	66.0933	56.7468	60.7601	52.9566	86.1878	55.9094	62.2025	73.3178	52.9957	58.8093	41.5122	56.7509	39.5254	48.0943	53.2398	49.4231	57.4889	75.3735	52.9957
	2.40017	54.6762	56.3846	63.62	50.9309	66.0933	56.446	60.3437	53.045	85.6376	55.8488	61.9584	73.2478	53.1299	58.7927	41.5825	56.929	39.3634	48.0338	53.09	49.3882	57.5324	75.4453	53.1299
	2.4335	54.5039	56.4651	63.6322	50.69	65.9155	55.7974	60.5233	52.8977	85.5571	55.9746	61.79	73.2221	53.1953	58.7752	41.5825	56.9425	39.4842	47.8696	52.9757	49.303	57.5324	75.5344	53.1953
	2.46683	54.963	56.615	63.4558	51.0324	65.6827	55.3861	60.2407	52.6704	85.4306	56.1676	61.8846	72.9244	53.2349	58.3863	41.5825	56.5553	39.2699	47.7002	52.9757	49.1423	57.9131	75.5344	53.2349
	2.50017	55.0738	56.7832	63.373	50.7254	65.6747	55.0194	60.2707	52.6704	85.2533	56.0525	62.3461	72.9244	53.1747	58.0926	41.6945	56.5553	39.4097	47.8118	52.9757	49.2009	57.912	75.6482	53.1747
	2.5335	55.1169	56.8355	63.3352	50.949	65.4631	55.0936	60.3167	52.7622	85.4216	56.0711	62.3461	73.2636	53.1788	58.6141	41.6745	56.6377	39.5532	47.6577	52.5351	49.3512	57.7899	76.1128	53.1788
	2.56683	55.2465	56.8355	63.2642	50.8317	65.6005	55.0553	60.3901	52.9144	85.0884	56.1559	62.532	72.7268	53.2761	59.0038	41.4566	56.0136	39.5575	47.4661	52.496	49.3512	57.9628	75.4362	53.2761
	2.60017	55.4166	56.7007	63.2175	50.824	65.6385	54.8959	60.4503	52.826	85.0081	56.1945	62.3714	72.6779	53.5091	58.7513	41.3999	55.7494	39.4855	47.4951	52.5136	49.303	58.2048	74.6914	53.5091
	2.6335	56.0706	56.8401	62.6921	51.0677	65.7708	54.8739	60.3901	52.8291	84.4598	56.1945	62.1868	73.1817	53.6864	58.4128	41.2094	55.6097	39.4504	47.7603	52.6252	49.303	57.589	75.7425	53.6864
	2.66683	56.1198	56.7313	62.1346	50.9973	65.7849	55.1168	60.3801	52.5431	84.7108	55.975	62.3372	72.6997	53.7935	58.1383	40.7901	55.7887	39.5589	47.576	52.7458	49.086	57.5241	76.5616	53.7935
	2.70017	55.6203	56.7313	62.5333	51.01	65.9519	55.2253	60.6498	52.8793	86.184	56.2804	62.4491	72.7486	53.7896	57.7147	40.753	55.7174	39.3567	47.405	52.9181	49.303	57.5241	76.813	53.7896
	2.7335	55.0852	56.6518	62.1097	50.8867	65.9519	54.9721	60.597	52.4931	86.5905	56.2959	62.2173	72.7207	53.7458	58.013	40.753	55.7174	39.3567	47.4968	53.0304	49.1556	57.4818	76.5064	53.7458
	2.76683	55.3709	56.8838	62.1097	50.8867	65.9519	54.7087	60.0504	52.5237	87.9213	56.3997	62.6033	72.6389	53.9452	57.3956	40.7964	55.8043	39.0952	47.5127	53.0356	49.1676	57.3745	77.0158	53.9452
	2.80017	55.5328	56.8838	62.1563	50.8734	65.98	54.8572	60.3803	52.4252	88.371	56.3997	62.6033	72.7626	53.8808	58.3548	40.7616	54.8159	39.2206	47.5644	52.8306	49.2852	57.4295	77.3988	53.8808
	2.8335	55.7391	56.4444	62.1097	50.885	65.8464	55.0117	60.0529	52.4252	88.4385	56.7467	62.7156	72.8116	54.0618	58.1864	40.7166	53.9253	39.0809	47.5359	52.6238	49.412	57.3756	77.6888	54.0618
	2.86683	55.7391	56.4444	62.3375	50.7586	66.0474	54.8881	59.4962	52.3608	88.525	56.8514	62.0235	72.8927	53.9542	57.3341	40.5895	54.7076	39.0809	47.5259	52.4071	49.5708	58.1308	78.0038	53.9542
	2.90017	56.1717	56.4444	62.6006	50.9621	66.1072	54.6648	59.6961	52.3853	88.7698	56.7891	61.4203	73.2023	53.6738	57.3341	40.5895	55.1665	39.1412	47.541	52.3231	49.9157	59.3152	78.0038	53.6738
	2.9335	56.1717	57.022	62.7665	50.8909	66.098	54.5222	59.2478	52.1317	88.9454	56.5632	61.2165	73.3675	53.5742	56.9208	40.6237	54.9269	39.092	47.4946	52.6895	50.7357	59.1034	78.3283	53.5742
	2.96683	56.1717	57.022	63.5064	50.8155	66.098	54.3191	59.7817	52.3786	89.5876	56.5632	61.2165	73.3675	53.5368	56.7889	40.8278	55.3825	38.814	47.0751	52.7406	51.1526	59.3716	78.4359	53.5368
	3.00017	56.0487	57.2636	64.3874	50.8693	65.9186	54.2404	59.8351	52.0162	89.0664	56.5461	62.042	73.5682	53.5401	56.7374	40.8345	55.434	38.7943	46.7754	52.4216	51.2488	60.2349	78.4359	53.5401
	3.0335	55.9455	56.5012	64.6967	50.9539	65.5541	54.2297	59.4427	52.0162	89.5128	56.5036	61.8802	73.5904	53.7233	57.0613	40.816	54.6387	38.674	46.619	52.2292	51.5708	60.3917	78.3163	53.7233
	3.06683	55.9252	57.2972	65.4499	51.2634	65.6648	54.1502	59.4819	51.9909	90.2861	57.3022	61.8269	73.9157	53.9261	56.7977	40.6469	54.2255	38.7352	46.6812	52.0874	51.1893	60.5209	78.4418	53.9261
	3.10017	56.0767	56.5012	66.1853	51.7527	65.8059	54.0472	59.4539	52.0842	90.1862	56.4865	60.4147	74.0559	54.0143	56.1867	40.4955	54.3161	38.8356	46.9199	51.8174	50.2529	61.8475	78.4209	54.0143
	3.1335	55.9946	55.6866	66.5285	52.1973	65.82	53.9558	59.4315	52.039	89.1841	56.3299	60.098	74.2165	53.9765	55.9401	40.6405	53.4267	38.953	47.2287	51.549	49.9316	61.9481	78.3373	53.9765
	3.16683	55.8604	55.7988	66.7012	52.132	65.9158	53.6676	59.263	51.8726	89.1841	55.8894	59.8713	74.2619	53.9756	55.6801	40.6032	52.6775	38.7119	47.5618	51.4625	50.1373	62.6063	78.1257	53.9756
	3.20017	55.7505	56.5052	66.8835	52.2495	65.8245	53.559	59.2682	51.8726	89.6136	55.7832	60.2896	74.4437	54.2137	55.5606	40.6381	52.886	38.4215	47.8698	51.3005	50.0263	63.3394	77.5908	54.2137
	3.2335	55.605	56.5052	66.8835	52.2043	65.5635	53.3532	59.1816	52.0444	89.6552	55.7049	61.009	74.3161	54.2305	55.6474	40.578	52.9694	38.5355	48.0608	51.0951	49.939	63.4245	77.5908	54.2305
	3.26683	54.9433	56.1797	66.8835	52.1358	65.8155	53.1846	59.1484	52.0444	89.443	55.5193	61.7781	74.5696	54.26	55.8691	40.3801	52.7071	38.4311	48.081	51.0003	50.175	63.6455	77.1599	54.26
	3.30017	54.1872	56.1797	66.659	51.9147	65.8508	53.1388	59.263	51.814	89.0364	55.2139	61.4548	74.5325	54.3444	55.9869	40.3656	53.281	38.3927	48.3012	50.8686	50.0775	63.6455	76.9648	54.3444
	3.3335	54.1735	55.8361	66.3881	51.9209	65.7716	53.1901	59.5614	51.6156	88.9872	55.0509	61.7058	74.5325	54.1614	56.0522	40.388	52.9764	38.4355	48.5105	50.8643	49.5582	63.4245	76.4574	54.1614
	3.36683	54.5329	55.5354	66.1806	51.8996	65.5742	53.38	59.8826	51.6156	88.3466	54.65	61.3939	74.5325	54.0059	55.9217	40.2761	52.2892	38.4699	48.6442	50.7505	49.3323	62.9061	76.5948	54.0059
	3.40017	54.4569	55.2941	65.7249	51.6472	65.4557	53.3377	59.7911	52.239	87.97	54.644	62.1291	74.1917	54.0059	56.0789	40.122	51.776	38.5332	48.7583	50.6952	49.6554	62.4249	76.9784	54.0059
	3.4335	54.0144	55.3537	65.252	51.483	65.5991	53.2523	59.6854	52.1678	87.8094	54.861	61.8413	74.1917	53.9225	56.2574	40.1101	51.7413	38.6192	49.2122	50.6841	49.8543	62.1749	76.7863	53.9225
	3.46683	53.6265	55.3762	64.5411	51.483	65.7877	53.2465	59.6555	52.6849	87.97	54.8079	60.7749	74.0002	54.1562	56.1018	39.7055	51.6034	38.7874	49.1091	50.8517	49.8447	62.223	76.768	54.1562
	3.50017	53.4684	55.6908	63.6254	51.6897	65.5688	53.4813	59.6954	52.9276	88.1168	54.8079	60.9332	74.0002	54.312	56.1362	39.3574	51.1949	39.595	49.1828	51.1851	49.9338	61.727	75.9646	54.312
	3.5335	53.6765	55.5673	63.0336	51.3627	65.4509	53.4796	59.6366	52.7721	88.0097	54.1267	60.699	73.7548	54.312	55.8573	39.3721	51.0353	39.6635	48.9042	51.3158	49.6112	61.483	76.126	54.312
	3.56683	53.645	55.5203	62.8458	51.3167	65.0715	53.6625	59.8472	52.7247	87.849	53.4361	60.5986	73.4538	54.5226	54.8764	39.3762	50.9761	39.5999	48.589	51.5592	49.2042	61.4358	76.815	54.5226
	3.60017	53.2959	55.4727	62.3849	51.3874	64.6676	53.6041	59.6864	52.7247	87.7576	53.1621	60.4702	73.4538	54.3451	54.1203	39.52	50.5507	39.6132	48.5537	51.7615	48.9176	61.3627	77.2888	54.3451
	3.6335	53.5326	55.4727	61.9963	51.4953	64.7953	53.7364	59.9447	52.3655	87.8358	53.1413	60.6126	73.6652	54.5812	54.2422	39.5991	50.4978	39.8664	48.2293	51.3721	48.6209	61.4493	76.8092	54.5812
	3.66683	53.4309	55.4727	61.7405	51.4177	64.9201	53.7364	59.9297	52.3655	88.0373	53.5484	60.2957	74.0388	54.5812	54.0661	39.7302	50.4978	39.951	48.0844	50.4362	48.298	61.6276	77.3793	54.5812
	3.70017	53.0841	55.2745	61.6918	51.1574	65.0165	53.8135	60.2182	52.7317	87.9164	54.2481	60.3519	74.2468	54.4141	54.0176	39.7302	50.4978	40.7291	48.1362	49.8796	48.1403	61.8423	76.8993	54.4141
	3.7335	53.4025	55.3957	61.5112	51.169	65.2633	53.8504	59.9911	51.6746	88.4895	53.4066	60.3519	74.4498	54.5397	54.1233	39.6688	50.4978	40.8019	48.1594	49.8796	48.1988	61.9449	76.3371	54.5397
	3.76683	53.7713	56.6786	61.4233	51.2368	65.2022	53.8894	59.9537	51.6543	89.1451	53.189	60.1108	74.4861	54.6108	54.1233	39.7202	50.6002	40.9331	47.9089	49.9675	48.2183	62.2099	76.3371	54.6108
	3.80017	53.867	56.9811	61.5941	51.2368	65.2215	53.9913	59.5467	50.9957	89.1451	52.706	60.3207	74.6268	54.4601	54.3028	39.7202	50.6002	40.7294	47.6116	49.8277	48.2696	62.6875	76.2473	54.4601
	3.8335	54.2204	56.865	61.6193	51.2368	65.4112	53.839	59.4239	50.9083	89.1451	52.898	60.4035	74.6806	54.6026	54.336	39.6324	50.7913	40.0521	47.3934	49.8418	48.3803	64.0039	76.369	54.6026
	3.86683	54.2039	56.865	61.5692	51.1195	65.8889	53.7608	59.2197	50.9073	89.1451	52.8462	60.4035	74.9872	54.7316	54.2642	39.8023	51.2104	40.6546	47.2384	49.8996	48.6688	65.4657	77.0092	54.7316
	3.90017	54.2039	57.5788	61.2372	50.7844	66.243	53.8707	59.0891	50.9073	89.2159	52.8403	60.5938	75.37	54.6867	54.2339	39.6286	50.7141	40.2668	47.1649	49.9148	48.6819	66.1397	76.0893	54.6867
	3.9335	54.3383	57.5476	61.1297	50.5809	66.4037	53.8416	59.3729	50.9083	88.7474	52.4168	60.3473	75.5443	55.045	54.4241	39.1215	50.3521	40.3721	47.5239	49.9173	48.8864	66.5161	75.5812	55.045
	3.96683	53.9449	57.4366	60.9821	50.6267	66.2857	53.7972	58.932	50.9894	88.3459	51.7819	59.7912	75.6087	54.2453	54.4056	39.6286	50.126	40.409	47.8842	49.7966	48.9068	67.1462	75.5812	54.2453
	4.00017	53.6385	56.7236	60.6065	50.6341	65.8481	53.4443	58.7038	50.9894	87.6901	51.6819	60.3676	75.714	53.9751	54.8601	39.5364	50.1173	40.34	47.736	50.2338	48.9403	68.516	74.7981	53.9751
	4.0335	53.5311	56.9367	60.3193	50.8346	66.2444	53.4443	58.7038	50.9894	88.3856	51.4016	60.5804	75.7395	54.3434	55.2924	39.5236	50.1173	40.4339	47.4453	51.4074	49.0435	69.7217	74.8614	54.3434
	4.06683	53.3148	56.7377	59.9839	50.8346	66.7186	53.4639	58.8012	51.1253	87.7481	51.6299	60.3055	75.7016	54.1663	55.5424	39.5673	49.7535	40.5139	47.6552	51.4237	49.0683	70.1917	75.1091	54.1663
	4.10017	53.031	56.2168	59.3194	50.833	66.8123	53.1539	58.3862	51.2522	87.7298	51.3105	60.2652	75.6774	53.8834	55.4931	39.6004	49.3547	40.2533	47.5999	51.4958	49.0836	70.595	73.9776	53.8834
	4.1335	52.9288	56.5147	58.8543	50.8806	66.956	53.1511	58.7685	51.313	87.105	51.4521	60.4101	75.7222	53.7191	55.4329	39.1976	49.3894	40.2204	47.5415	51.5019	48.9604	71.4972	73.1377	53.7191
	4.16683	52.8061	56.4893	58.6833	50.8806	66.7348	53.0584	59.0646	51.3078	87.017	50.9606	59.8045	75.8229	53.5113	55.5839	39.417	49.2952	40.3306	47.4876	51.6272	49.0265	72.8638	73.0007	53.5113
	4.20017	52.7146	56.604	58.578	50.9857	66.7529	53.0153	58.9543	51.547	86.8867	51.4521	60.2871	75.9454	53.4429	55.7186	39.0606	48.9592	40.3428	47.6421	51.4229	48.7233	73.861	73.1919	53.4429
	4.2335	52.6851	56.3715	58.4695	51.026	66.5131	53.0153	58.7361	51.6966	86.8867	51.48	59.2068	75.7411	53.3532	55.6572	39.1553	49.1601	40.5089	47.7389	51.2978	48.7233	75.1602	73.4384	53.3532
	4.26683	52.5511	56.2499	58.4008	50.9857	66.7717	53.0349	58.805	51.3626	87.442	51.1134	59.7029	75.4858	53.2677	55.6572	39.1638	49.4388	40.732	47.4853	51.2772	48.3068	76.623	73.9071	53.2677
	4.30017	52.4096	56.2499	58.1573	50.9742	66.7717	53.2232	58.6742	51.2921	86.8635	51.4887	59.7029	75.5393	53.1005	55.3117	39.064	49.0491	40.7963	46.9573	51.2772	48.2625	77.2118	74.6741	53.1005
	4.3335	52.1849	56.2499	57.9209	50.9227	66.7717	53.2232	58.5911	51.3394	87.944	51.686	59.8003	75.3391	53.051	55.0402	38.9605	48.4765	40.7963	46.7088	51.2772	48.3068	77.3583	76.3891	53.051
	4.36683	52.1849	56.3743	57.9209	50.8097	67.0828	53.2804	58.4594	51.1881	88.1224	51.686	59.9593	75.0656	52.8676	54.7729	39.0564	48.6474	40.6594	46.6322	51.0033	48.2727	77.3583	76.1157	52.8676
	4.40017	51.7201	56.2279	57.5244	50.584	66.6174	53.5001	58.4229	50.7372	88.476	51.4921	59.8522	75.2721	52.8674	54.5632	39.0391	49.0823	40.4092	46.7679	50.6821	47.7954	77.6213	77.1994	52.8674
	4.4335	51.7215	56.252	57.3421	50.1934	66.1247	53.5001	58.5309	50.3066	88.1449	51.4176	59.7955	75.3344	52.712	54.4715	38.9355	49.3185	40.4092	46.429	50.2104	47.6561	77.502	77.3559	52.712
	4.46683	51.7609	55.9717	56.8386	50.1934	65.8071	53.3864	58.3721	50.1152	88.2127	51.1514	59.7955	75.3591	52.9885	54.4446	38.9608	49.3185	40.3172	46.5101	50.0812	47.6109	77.0658	78.2822	52.9885
	4.50017	51.8278	55.7867	56.6385	49.9194	65.8071	53.3864	58.3294	50.1349	88.1145	51.4176	59.7955	75.3591	53.5011	54.4446	39.0031	49.4789	40.3437	46.4051	49.7481	47.6109	76.2421	78.7089	53.5011
	4.5335	51.9271	55.8472	56.3908	49.8371	65.7698	53.52	58.2504	50.1349	88.1145	51.1514	59.7787	75.243	53.3785	54.2177	39.1449	49.9243	40.1135	46.867	49.1633	47.5902	75.8095	78.9765	53.3785
	4.56683	51.8191	55.7385	56.3107	49.7099	65.7325	53.3295	58.2367	49.8542	88.1145	50.944	60.0024	75.4067	53.7237	54.0864	39.1969	49.3185	40.0382	47.0167	48.9424	47.6371	75.6269	79.0809	53.7237
	4.60017	51.8926	55.7385	56.0155	49.6893	65.6539	53.1451	57.9524	50.0314	88.1145	51.055	60.0735	75.5131	53.7981	54.0308	39.291	49.1102	39.9621	46.8913	48.7628	47.5458	75.3641	78.4981	53.7981
	4.6335	51.9674	55.9119	56.039	49.7407	65.7292	52.8386	58.0409	49.8671	87.9652	51.055	59.9774	75.3077	53.8484	54.0308	39.311	49.4236	39.8648	46.979	48.5954	47.878	75.1018	78.7591	53.8484
	4.66683	52.1328	56.2558	55.8037	49.8001	65.8119	52.4917	58.1979	49.4142	87.4133	51.0231	60.154	75.4141	54.0557	54.0308	39.4233	49.9294	39.823	47.2112	48.8223	47.9965	75.1018	78.7591	54.0557
	4.70017	52.0673	55.9306	55.777	49.8615	65.6911	52.2292	58.3397	49.092	86.7209	51.0231	60.0074	75.5716	54.0196	54.1561	39.6664	50.0068	39.7615	47.6127	48.8627	47.8556	75.1071	79.0617	54.0196
	4.7335	52.0673	55.7688	55.777	49.967	65.8512	52.0122	58.1637	49.092	86.7209	51.1394	60.3456	75.4331	53.9118	54.0049	39.8755	49.9165	39.6606	47.6333	48.6905	47.8556	75.1749	79.3525	53.9118
	4.76683	52.2328	55.3204	55.5699	49.9481	66.001	51.6336	58.0073	49.092	86.6018	51.1714	59.8739	75.2932	53.6938	54.0445	40.1921	49.834	39.6056	47.7697	48.6201	47.8556	75.5764	79.6164	53.6938
	4.80017	52.2996	55.7688	55.5682	50.0096	66.001	51.042	58.0073	49.0384	86.3846	51.1726	60.1518	75.0322	53.5091	54.1452	40.2338	50.1342	39.4178	47.8098	48.5122	47.8507	76.0743	79.7783	53.5091
	4.8335	52.2412	55.7261	55.4673	50.0239	65.8512	50.7989	57.7849	48.9191	86.17	51.1726	60.2628	74.8687	53.1702	53.8584	40.0645	50.1832	39.4178	47.8854	48.2802	47.8507	75.8191	80.0183	53.1702
	4.86683	52.2515	55.9834	55.59	50.1578	65.8967	50.6423	58.0101	48.9132	86.17	51.1218	59.9261	74.9995	52.8034	53.9387	39.8214	50.0882	39.0863	47.8167	48.6029	47.8573	76.8149	80.7831	52.8034
	4.90017	52.3329	56.2504	55.4556	50.2131	66.3761	50.572	58.0101	48.9572	86.2926	51.3571	59.8671	74.8361	52.569	53.9148	40.0332	50.2912	39.4098	47.8167	48.7876	47.8573	77.1214	82.3943	52.569
	4.9335	52.5575	55.9928	55.4166	50.541	66.3372	50.5781	58.5376	48.8264	86.2926	51.0666	59.8671	74.7526	52.4331	54.2147	40.2029	50.3673	39.5656	47.8716	48.8248	48.121	77.3421	84.2234	52.4331
	4.96683	52.7077	55.8383	55.5411	50.3733	66.2669	50.5586	58.4348	48.7682	86.2926	51.0666	59.6816	74.6177	52.4374	54.3041	39.9549	50.5433	39.2341	47.7755	48.6484	48.0482	77.3421	84.3014	52.4374
	5.00017	52.8417	55.8102	55.6468	50.6298	66.3068	50.6203	58.1948	48.8264	85.7762	50.8258	59.0052	74.5811	52.2687	54.2366	39.635	50.2531	38.9026	47.7755	48.145	47.867	76.7781	84.564	52.2687
	5.0335	52.8417	56.0116	55.3852	50.6677	66.6631	50.665	58.2327	48.886	85.7762	50.8258	58.9518	74.4524	52.2839	54.1647	39.3222	50.1874	38.8906	47.7381	47.8396	48.1781	76.3685	84.6162	52.2839
	5.06683	53.6564	56.2853	55.3736	50.724	66.6868	50.5786	58.3397	48.8029	85.5961	50.7795	58.7364	74.5677	52.0718	54.2906	39.2372	49.7435	38.9094	47.6262	47.4202	47.7868	76.3685	84.6162	52.0718
	5.10017	53.5534	56.6315	55.4811	50.7588	66.3598	50.2526	58.1992	48.8469	86.4065	50.7795	59.0314	74.5624	52.0059	54.2906	39.1167	49.291	38.9025	47.5282	47.3942	47.5926	76.3362	84.6488	52.0059
	5.1335	53.7846	56.5724	55.4441	50.7873	66.6868	50.6189	58.39	48.8888	87.4446	51.0181	59.0126	74.4599	52.1067	54.2248	39.0797	49.0076	38.9145	47.3727	47.1595	47.4081	76.3362	83.3025	52.1067
	5.16683	53.7846	56.808	55.4596	50.7248	66.6631	50.5074	58.5583	48.9484	87.972	50.4568	59.3076	74.4599	52.1067	54.1946	38.9614	49.2479	38.8712	46.8859	47.5196	47.4277	76.625	83.2509	52.1067
	5.20017	53.2728	56.5401	55.6192	50.5023	66.8247	50.7472	58.3823	48.9205	88.4573	50.7634	59.3076	74.2021	52.4042	54.1367	38.7576	48.5059	38.7966	47.461	47.871	47.547	76.6358	82.3526	52.4042
	5.2335	53.1245	56.4823	55.6192	50.2072	66.6467	50.9771	58.1232	48.9594	87.9473	50.4402	59.3076	74.1949	52.1923	54.073	38.7156	47.9805	38.6912	47.3364	47.8321	47.6296	77.0293	81.6837	52.1923
	5.26683	53.5523	56.3977	55.6499	49.8904	66.4318	51.0147	58.1232	49.1556	87.1802	50.141	59.3548	74.1567	52.2353	53.9358	38.6645	48.8669	38.6887	47.2602	47.8986	47.8779	77.4092	81.2212	52.2353
	5.30017	53.5523	56.3977	55.7779	49.8904	66.1208	51.1622	58.3386	49.1744	87.4407	49.4453	59.1629	74.1481	51.8908	53.9034	38.7223	48.4883	38.5053	46.9794	48.035	47.9117	77.9326	81.1516	51.8908
	5.3335	53.0179	56.4653	55.6609	50.1241	66.1208	51.0326	58.6877	49.2206	87.318	49.1972	59.3147	74.1821	52.2053	53.8243	38.7133	48.999	38.2757	46.8217	48.1982	47.6724	78.3733	80.5452	52.2053
	5.36683	52.5964	56.295	55.7431	50.0797	65.8519	50.9902	58.6369	48.9593	86.6662	49.2445	59.6335	74.2714	51.9234	53.6618	38.481	48.8596	38.1277	46.3741	48.0875	47.5294	78.8956	80.1084	51.9234
	5.40017	52.2944	55.9205	55.8639	49.8633	65.7186	51.0544	58.4122	49.1744	85.6674	49.1007	59.9217	74.2955	51.8274	53.4836	38.2688	48.9436	37.9387	46.913	48.0528	47.5294	79.9716	79.8568	51.8274
	5.4335	51.7208	55.7297	55.776	50.0435	65.8354	50.8756	58.709	49.1744	84.8732	49.2244	60.002	74.1132	51.9164	53.6318	38.3393	49.2832	38.1261	46.818	48.0211	47.3335	79.216	79.7622	51.9164
	5.46683	51.7208	55.8778	55.3973	50.0435	65.7477	50.811	58.6727	49.2114	83.9985	49.2244	60.2451	74.2605	52.0605	53.5317	38.577	49.2597	38.1261	47.221	48.1468	47.1757	80.2154	79.6335	52.0605
	5.50017	51.5198	55.7968	55.3191	50.2386	65.7477	50.7844	58.6056	48.9365	83.8505	49.3167	59.8801	74.4119	52.1472	53.5965	38.5586	49.2597	37.8954	47.5297	47.8932	46.8054	80.4516	79.5373	52.1472
	5.5335	51.1209	56.1698	55.047	50.1917	65.6693	50.8287	58.6203	49.1112	83.8505	49.3167	59.9423	74.2885	52.2287	54.1232	38.7337	49.6946	37.9307	47.3929	47.8877	46.8419	80.9177	79.58	52.2287
	5.56683	50.477	56.1698	54.9332	50.3292	65.8829	50.8557	58.63	48.7245	84.4292	50.083	59.8919	74.2885	52.3015	54.1499	38.577	49.6946	38.0102	47.5293	47.811	46.8677	81.74	79.58	52.3015
	5.60017	50.1939	56.1451	54.9332	50.3473	65.9702	50.8252	58.63	48.1953	84.1625	50.1243	59.6809	74.3687	52.2514	54.466	38.577	49.7138	38.0224	47.2755	47.4514	46.9559	82.2162	80.0978	52.2514
	5.6335	50.6756	56.2925	54.9332	50.3473	66.0027	51.1724	58.6608	48.1994	83.6475	50.2059	60.1987	74.3687	52.2359	54.1741	38.7636	49.6868	38.0423	47.175	47.4514	47.1651	82.5539	80.15	52.2359
	5.66683	51.0536	56.3746	55.3629	50.303	66.044	51.2564	58.4365	48.3408	84.0811	50.6359	59.858	74.3074	51.8931	54.186	38.9541	49.956	38.1805	47.465	47.5801	47.4384	81.4779	80.0091	51.8931
	5.70017	50.7046	56.4164	55.4379	50.3062	66.1657	51.0378	58.4419	48.5556	83.4343	50.2087	59.9699	74.3892	51.4063	54.3379	39.1551	50.7938	38.7114	47.8092	47.7702	46.9367	80.658	80.5716	51.4063
	5.7335	50.7877	56.4991	55.357	50.3062	66.5974	51.0498	58.4419	48.6191	83.074	50.3881	60.1635	74.0914	51.5044	54.3379	39.1819	51.0456	39.4416	47.5194	47.9545	46.3611	80.5771	80.1016	51.5044
	5.76683	51.1076	56.753	55.6945	50.3062	66.522	50.9698	58.3692	48.8195	83.3258	49.7707	59.7738	73.9947	51.5916	54.6992	38.992	50.5262	39.8902	47.6477	48.6452	46.6056	80.5771	79.9785	51.5916
	5.80017	50.7586	56.753	55.8842	50.3912	66.522	50.9286	58.526	48.8376	83.1017	50.3335	59.4066	74.0066	51.7734	54.3209	38.6769	50.0071	40.1041	47.5204	48.6452	46.5899	80.4531	80.1888	51.7734
	5.8335	50.6834	57.1197	55.9659	50.1079	66.4509	50.9011	58.5624	49.0605	83.2572	49.7606	59.4687	74.0066	52.0765	54.4779	39.0907	50.0614	40.3246	47.4315	48.7833	46.546	80.2992	80.4628	52.0765
	5.86683	50.9058	57.2675	56.0853	49.8845	66.4052	50.6514	58.5075	49.0087	83.2572	49.5204	59.3955	73.975	52.1709	54.1069	38.8239	49.8359	40.6539	47.6236	48.3659	46.5451	80.1568	80.4628	52.1709
	5.90017	50.7525	57.4757	56.2322	49.9792	66.4052	50.4982	58.5711	48.9622	83.2572	49.6621	59.4006	73.975	52.4785	54.3979	38.9939	50.0566	40.8685	47.639	48.8368	46.3807	80.0103	80.9812	52.4785
	5.9335	50.5308	57.9568	56.2526	50.1125	66.3138	51.0231	58.4621	48.9622	83.7783	49.4216	59.0352	73.8299	52.707	54.3979	39.0548	50.5707	40.8827	47.5464	48.9423	46.152	79.1934	80.8924	52.707
	5.96683	50.506	57.5971	56.0871	50.1496	66.3392	51.5995	58.4621	49.1026	84.1735	49.6207	58.9766	73.8456	52.9013	54.5003	39.0128	50.7766	41.0069	47.6245	49.0382	46.1756	79.0214	80.9525	52.9013
	6.00017	50.0487	57.5985	56.1245	50.0163	66.3227	51.6882	58.5249	49.0604	84.1735	49.8378	59.2055	73.975	53.2077	54.4365	39.0532	51.0214	41.1297	47.5221	48.6305	46.0836	78.3948	81.7101	53.2077
	6.0335	49.9857	57.6231	55.9523	50.0923	66.2773	51.7005	58.5935	48.6307	84.2338	50.2136	59.1643	73.9632	53.3224	54.6348	38.9462	51.9291	41.3354	47.4207	48.2172	46.1028	78.3948	83.243	53.3224
	6.06683	49.9443	57.5697	55.9748	50.0637	66.2482	51.6534	58.8829	48.9319	85.2669	50.2744	58.7122	74.0393	53.3092	54.6348	39.1473	52.151	41.5028	47.4549	47.9128	46.3276	78.5218	83.4916	53.3092
	6.10017	49.3909	57.4887	55.9748	49.9877	66.2497	51.4835	58.8829	49.1529	84.4402	50.3494	59.0431	74.1168	53.2713	54.3258	39.2279	52.151	41.6458	47.3635	48.1838	46.2732	79.3328	83.8815	53.2713
	6.1335	49.63	57.512	56.1994	49.9506	66.3406	51.3537	58.6741	49.089	84.7367	50.3795	59.3655	73.7967	53.1283	54.3528	39.2449	52.5867	41.8735	47.0275	48.0926	46.0483	78.5956	84.6615	53.1283
	6.16683	49.5404	57.5627	56.1994	49.9946	66.3051	50.9992	58.9048	48.7331	84.8967	50.3043	59.2858	74.0051	53.1994	54.1577	39.0408	52.623	42.152	46.8354	48.2304	46.2293	78.2898	83.8132	53.1994
	6.20017	49.63	57.613	56.2071	50.1681	66.1677	50.8053	59.0498	49.4541	85.2324	50.3043	59.5703	74.0051	53.3258	54.516	38.8433	53.1709	42.0916	46.4079	48.493	46.2592	78.1694	83.0329	53.3258
	6.2335	50.1165	57.613	55.8384	50.1945	66.2324	50.639	58.956	49.8558	85.4571	50.1827	59.4894	73.8842	53.4197	54.3823	38.6952	52.9428	42.0424	46.3127	48.6438	46.3126	78.2088	82.5502	53.4197
	6.26683	49.6557	57.3674	55.9398	50.128	66.1888	50.5327	58.956	50.3665	85.2252	50.4263	59.4894	74.2798	53.3227	54.1956	38.8113	52.4769	42.0894	46.2856	48.6887	46.3889	78.6252	82.7664	53.3227
	6.30017	50.1423	57.6473	56.2961	50.0219	65.8851	50.4974	59.1047	50.5511	85.557	50.7685	59.3436	74.2798	53.4569	54.103	38.8063	52.9231	42.0894	46.1782	48.8587	46.4897	78.6252	83.0871	53.4569
	6.3335	50.1838	57.2154	56.0287	49.9628	65.9121	50.4642	59.0374	50.6642	86.2981	50.3667	59.3863	74.3418	53.4585	54.1516	38.5975	53.3284	42.0362	46.5034	49.0104	46.7369	78.4538	82.8816	53.4585
	6.36683	50.6475	57.2162	56.227	49.9614	65.9522	50.2679	58.9074	50.7087	86.6277	49.8909	59.2108	74.4086	53.3598	54.0831	38.4763	53.5873	41.8519	46.8275	49.3268	47.079	78.4132	83.0405	53.3598
	6.40017	50.3754	57.364	56.3212	49.9335	66.3263	50.4993	58.9551	50.7925	86.2981	50.2246	59.5378	74.5784	53.5991	53.8183	38.4866	54.011	41.6651	46.7347	49.1559	46.9059	78.4132	83.2353	53.5991
	6.4335	50.8743	56.8242	55.9982	49.9098	66.2809	50.9177	59.238	50.4761	86.3393	50.5338	59.5916	74.3644	53.9054	53.4612	38.4866	53.4154	41.2351	46.6889	49.2345	46.9412	77.9086	83.4767	53.9054
	6.46683	50.6772	57.3096	55.8136	49.8253	66.0878	50.8566	59.3262	50.3986	86.3393	50.3915	59.8937	74.6198	53.8497	53.3228	38.4866	53.0824	41.0691	46.7696	49.2465	47.0387	77.6304	83.4029	53.8497
	6.50017	50.4464	56.4285	55.8513	49.9254	66.1848	50.7101	59.1698	50.3986	86.5073	50.5286	59.3718	74.6718	53.8912	53.5764	38.5824	53.1324	40.8304	46.651	49.1124	46.9188	77.0963	83.4912	53.8912
	6.5335	50.2418	57.2397	56.0544	49.877	65.8629	50.6219	59.1606	50.3073	86.2698	50.9461	59.7336	74.6718	53.8912	53.6238	38.6288	52.8689	40.6467	47.0022	49.0514	46.7072	76.7036	83.4487	53.8912
	6.56683	50.0421	57.2851	56.1722	49.8725	65.9556	50.5821	59.1593	49.9214	86.0103	50.5286	59.6545	75.1386	53.5159	53.503	38.6903	52.8165	40.4278	46.9665	48.794	46.2515	76.7254	83.1302	53.5159
	6.60017	49.9355	57.8661	56.1321	49.6798	66.1942	50.4184	59.3094	49.2608	86.0103	50.1212	59.8139	75.1998	53.7519	53.5429	38.4667	52.7942	40.1227	46.7795	48.3894	46.2698	76.7254	83.0052	53.7519
	6.6335	49.476	57.6161	56.1321	49.7982	66.2354	50.3785	58.8607	49.3531	85.1501	49.588	59.4368	75.7199	53.7519	53.8968	38.4667	52.7942	39.9551	46.9308	47.9788	45.9638	76.537	82.9317	53.7519
	6.66683	49.4675	57.947	56.1767	50.3534	65.8294	50.1536	59.3813	49.1412	84.8088	49.9478	59.4368	75.6716	53.8441	53.8589	38.7934	52.1069	39.5138	46.7541	47.7681	46.096	76.2406	82.7575	53.8441
	6.70017	49.4675	57.8291	56.2518	50.3203	65.697	50.0852	59.2687	49.3207	84.8271	49.9478	59.3423	75.6982	53.9742	53.8589	38.8196	52.9594	39.5042	46.2611	48.2134	46.452	76.0293	82.6052	53.9742
	6.7335	49.442	57.6766	55.8483	50.3203	65.766	50.5284	59.1692	49.4976	85.7733	49.9478	59.3911	75.6789	53.9917	53.8166	38.682	53.1022	39.0857	46.109	48.4902	46.6446	75.8072	82.0112	53.9917
	6.76683	49.3643	57.8193	55.6354	50.5941	65.6948	50.4829	58.9928	49.5583	84.9126	49.8743	59.3404	75.8703	53.9156	54.284	38.7292	53.6781	38.8784	46.0023	48.7024	46.6794	75.8072	81.9592	53.9156
	6.80017	49.3108	57.7306	55.2936	50.5082	65.7899	50.8605	58.978	49.6011	86.0906	49.8743	59.3404	75.7324	53.8605	55.1752	38.8428	53.3188	38.9646	46.0008	48.6205	46.6158	75.8715	81.8871	53.8605
	6.8335	48.4924	57.7306	55.224	50.1197	65.9412	50.9608	59.0893	49.712	86.0214	49.693	59.43	75.689	53.9021	55.5287	38.7157	52.9496	39.1314	46.265	48.6583	46.4409	75.8212	81.5015	53.9021
	6.86683	48.6136	57.7306	55.2332	49.8929	65.9848	50.857	59.1261	49.7778	84.8992	49.2083	59.1356	75.7425	53.907	54.9074	38.846	52.4545	38.9468	45.8284	48.8482	46.5802	75.6674	81.7626	53.907
	6.90017	48.9171	57.7778	55.2299	50.1204	65.9848	51.0691	59.2157	49.8391	85.9721	49.693	59.1655	75.8417	54.1024	55.6093	38.8253	51.8764	39.1961	45.8824	48.4094	46.4217	75.3514	82.2887	54.1024
	6.9335	49.3764	57.5222	55.1327	50.1204	65.7193	50.9899	59.1781	49.9493	85.6553	49.5931	59.2158	75.9484	54.1024	54.9536	38.934	52.4545	38.9666	46.0654	48.5778	46.8053	74.892	82.0562	54.1024
	6.96683	49.919	57.758	54.974	49.641	65.7875	50.9899	59.2305	49.8709	85.7918	49.5931	59.2519	76.1356	54.1525	54.5271	38.7873	52.5048	38.9137	45.9996	48.7816	46.8608	74.3884	82.0562	54.1525
	7.00017	49.8481	57.5222	55.2101	49.641	66.1473	50.9899	59.2305	50.1013	86.42	49.5931	59.1087	76.1715	54.3014	54.5271	38.7014	52.3887	38.8323	46.1203	48.6151	46.9689	73.9851	82.1899	54.3014
	7.0335	49.3813	57.758	55.2754	50.0318	66.3158	50.6376	59.2965	50.3251	86.1196	49.3518	58.6872	76.1715	54.1675	54.5304	38.7413	51.8796	38.7325	46.1026	48.5395	47.0795	73.7469	81.045	54.1675
	7.06683	48.8531	57.8788	55.0892	50.1458	66.049	50.5763	59.2619	50.4892	85.7956	48.8111	58.6617	76.4154	53.7503	54.3789	38.7549	51.8796	38.8668	46.222	48.3508	47.059	73.8237	81.045	53.7503
	7.10017	48.8531	57.6774	55.0892	49.795	66.0292	50.599	59.5031	50.6522	86.1781	48.861	58.9049	76.3045	53.6516	54.2657	38.7314	51.5673	39.0619	46.2596	48.3508	47.0165	73.8237	79.6378	53.6516
	7.1335	48.9382	57.0662	55.321	49.8114	65.4429	50.6375	59.6926	50.7384	85.6789	49.3246	58.9164	76.5688	53.394	54.1926	38.7015	51.6948	39.0619	46.0943	48.368	47.0788	73.8592	81.0576	53.394
	7.16683	49.5673	56.5384	55.321	49.9912	65.2807	50.8517	59.865	50.9601	85.7956	49.6948	58.9624	77.0292	53.0398	54.1761	38.8406	52.0075	38.9459	46.0699	48.7323	46.8918	73.8823	79.7443	53.0398
	7.20017	49.449	56.344	55.331	50.0705	65.4327	50.8939	59.8498	51.0139	85.9833	49.6948	59.1535	77.1186	52.8067	54.2657	38.9666	52.2743	39.2179	46.2348	48.8762	46.987	74.4946	79.1936	52.8067
	7.2335	48.8204	56.3963	55.3357	50.1039	65.5296	50.7308	59.8852	50.8878	85.8571	49.8691	59.4191	77.1251	52.6835	54.2689	38.7805	52.2743	39.1159	46.0939	48.9672	47.0052	74.6876	79.2217	52.6835
	7.26683	48.649	56.3206	55.2306	50.2876	65.7157	50.8437	59.9438	50.7707	86.6125	49.7881	59.3767	77.1764	52.6541	54.1959	38.4261	52.1611	38.9445	46.0367	48.8762	47.0052	75.6387	79.4376	52.6541
	7.30017	48.396	56.577	54.9151	50.4825	66.1709	51.0494	59.9858	50.8878	86.7302	49.8187	59.4528	77.1764	52.6107	54.2625	38.4261	51.1755	39.2628	46.0406	48.9015	46.8834	76.6868	79.2779	52.6107
	7.3335	47.9354	56.577	54.5761	50.6225	65.9183	51.1097	59.9312	50.7707	87.2884	49.2679	59.4643	77.2645	52.5373	54.39	38.1948	51.8213	39.2917	45.8452	49.012	46.7299	77.8877	79.2779	52.5373
	7.36683	48.503	56.515	54.4331	50.6906	65.7876	51.0334	59.6758	50.6535	87.0146	49.3469	59.6899	77.135	52.6077	53.8985	38.2132	51.8213	39.2917	45.8355	49.0077	46.5359	78.7083	80.1635	52.6077
	7.40017	48.7683	56.3643	54.2758	50.9125	65.8422	51.1921	59.6758	50.5686	86.8502	49.2679	59.8537	76.9686	52.9166	53.2472	38.0646	50.8643	39.3188	45.881	49.0068	46.7299	79.3488	80.1635	52.9166
	7.4335	48.7683	56.5619	53.9543	51.0209	65.9002	51.279	59.3803	50.603	85.6059	48.5483	59.8687	77.0414	52.9076	53.3281	38.0941	51.0045	39.0388	45.8428	48.7893	46.5114	79.7883	80.5556	52.9076
	7.46683	48.2986	56.9227	53.8664	51.3133	65.8422	51.3218	59.4964	50.3135	85.6059	48.5613	60.309	77.0536	52.8406	53.5029	38.1235	50.6463	39.1784	45.9332	48.5566	46.7636	80.135	80.3538	52.8406
	7.50017	48.0991	57.2694	53.9204	51.3133	65.9382	51.1782	59.5865	50.3489	85.0024	48.0188	60.3337	77.0536	52.7615	53.5857	38.4148	50.536	39.1621	45.7244	48.5566	46.9213	80.4751	80.3775	52.7615
	7.5335	47.9268	57.571	53.6891	51.8437	65.9382	51.1128	59.5865	50.802	85.0457	48.5941	60.5901	77.3384	52.8506	53.2728	38.5954	50.0602	39.2729	45.677	48.7056	46.7618	80.8162	80.3775	52.8506
	7.56683	47.8723	57.2694	53.5227	51.863	65.9534	51.051	59.6946	50.567	84.9116	48.5113	60.3759	77.3832	52.5713	53.2728	38.987	50.0204	39.3638	45.8073	48.7316	46.9148	81.0323	80.0736	52.5713
	7.60017	48.0446	57.6571	53.4146	52.1341	65.9567	51.0183	59.7917	50.7526	84.9116	47.7422	60.1778	77.5787	52.4297	53.6752	39.3735	50.2984	39.3949	46.0807	48.7238	46.7832	81.1262	79.8987	52.4297
	7.6335	48.2337	57.5813	53.4146	52.1341	65.9418	51.0801	59.7213	50.7644	84.9683	47.7238	60.0011	77.7407	52.5516	53.7015	39.4783	50.2155	39.0293	45.7542	48.5343	46.9363	81.5567	79.7989	52.5516
	7.66683	48.8581	57.2722	53.4146	52.0503	65.6378	51.1722	59.5317	50.9673	84.707	48.4082	60.0958	77.6515	52.4263	53.5267	39.4068	50.0045	38.9227	46.1666	48.3566	47.0565	82.1016	80.0077	52.4263
	7.70017	48.6578	57.7039	53.5391	51.8565	66.1003	51.1633	59.9234	50.9879	85.5352	48.9513	59.8058	77.6515	52.9013	53.5936	39.2044	50.1543	38.9719	46.1991	48.4352	47.1228	82.007	80.2213	52.9013
	7.7335	47.8715	57.7373	53.364	51.6222	66.0148	51.1633	59.8304	51.3678	86.4468	49.2103	59.3957	77.6875	53.2135	53.5112	39.367	49.8471	38.9163	46.2387	48.5161	47.1846	81.7414	80.0513	53.2135
	7.76683	47.9245	57.7373	53.6405	51.5156	66.0148	51.0504	59.8679	51.3546	86.0827	49.4025	59.6263	77.6965	53.2135	53.5112	39.174	49.6187	38.8921	46.2524	48.4766	47.1875	81.4258	80.0657	53.2135
	7.80017	47.8715	58.3987	53.6405	51.0027	66.0904	50.8432	59.8304	51.597	86.1112	49.858	59.6263	77.6973	53.5652	53.7117	38.9028	49.1032	38.8413	46.5965	48.6348	47.2563	81.5492	79.9074	53.5652
	7.8335	47.8653	57.8479	53.6405	51.0603	65.6425	50.981	59.7836	51.4014	86.9234	49.8464	59.2504	77.7276	53.6965	53.4743	38.8438	48.7166	38.8863	46.7095	48.6218	47.2106	81.0901	80.0447	53.6965
	7.86683	47.811	57.8103	53.846	50.6985	65.5654	51.2401	59.7811	51.0172	87.0062	50.0554	59.2233	78.1152	53.7885	53.4982	38.9028	48.8086	38.9262	46.4513	48.3876	47.3768	80.5181	80.3617	53.7885
	7.90017	47.8597	58.2101	54.1705	50.7102	65.7647	51.4358	59.7895	51.0172	86.2609	50.1395	58.5572	78.096	53.7885	53.7182	38.8438	48.8987	38.9262	46.5759	48.3876	47.303	80.5181	80.2241	53.7885
	7.9335	47.556	58.4063	54.5544	50.7102	65.6294	51.8716	59.8145	50.806	85.8274	50.157	59.2233	78.3954	53.9098	53.5634	38.6329	49.2124	38.928	46.4918	48.3471	47.2262	80.7872	79.7393	53.9098
	7.96683	47.1018	58.4063	54.6434	50.4924	65.6294	51.6887	59.8579	50.7659	85.7878	49.6233	58.5952	77.9198	54.0149	53.7231	38.4861	49.8137	38.928	46.5013	48.6606	46.7879	80.3341	80.0556	54.0149
	8.00017	47.1392	58.4441	54.7401	50.5633	65.6285	51.6887	59.8829	50.9168	85.6513	49.7464	58.6032	77.9198	54.0697	53.8355	38.6577	50.0633	39.0066	46.0289	48.6606	46.3224	80.2382	80.6473	54.0697
	8.0335	47.1849	57.9346	54.5918	50.8811	65.6285	51.7504	59.9532	50.9505	85.7868	49.9336	58.7048	77.8273	53.96	53.8355	38.6971	50.1565	39.109	45.5245	48.5032	46.2885	80.2935	80.2792	53.96
	8.06683	47.1849	58.0434	54.8852	51.55	65.6558	52.0158	60.0775	50.897	85.5516	49.934	57.9208	78.0565	54.2165	53.8507	38.6313	50.6967	39.3494	45.4756	48.3219	46.1483	80.3143	80.2792	54.2165
	8.10017	47.1267	58.0434	54.8852	51.6124	65.5264	52.301	60.3007	50.8718	85.2863	50.3727	58.0188	78.0484	54.3806	54.0373	38.6734	50.7246	39.4211	45.4936	48.4426	46.1811	80.4281	80.2386	54.3806
	8.1335	46.5627	57.7893	54.8852	52.0536	65.2989	52.2387	60.2357	50.7679	85.4041	49.5974	57.9208	77.6775	54.9502	53.9633	38.7639	50.7246	39.5028	45.3503	48.4322	46.1811	80.2197	79.8183	54.9502
	8.16683	46.4316	58.1897	54.8852	52.2871	65.6401	52.2479	60.1803	50.6868	85.5872	49.5809	57.5877	77.1822	54.4151	54.0343	38.8256	51.196	39.4881	45.104	48.1092	46.2494	80.2785	79.0006	54.4151
	8.20017	46.535	57.9213	54.5279	52.5173	65.3519	52.1706	60.2548	51.0633	85.6606	49.5925	58.4355	76.8688	53.8288	53.9745	38.6418	50.9974	39.3293	45.1585	48.0086	46.2949	80.2785	79.0006	53.8288
	8.2335	46.535	58.0528	54.3453	52.4895	65.4356	51.7979	60.1677	51.1814	85.0298	48.9873	59.1268	76.8688	53.828	53.5933	38.3932	50.8595	39.0869	45.2254	47.9595	46.2621	80.0074	79.0006	53.828
	8.26683	46.6469	58.12	54.3085	52.4895	65.5592	51.5942	60.2706	51.0183	85.6636	49.0219	59.1268	76.8201	53.34	53.6414	38.2426	50.8595	38.9745	45.4821	47.8978	45.9435	79.5614	79.7609	53.34
	8.30017	47.369	57.7337	54.3085	52.4895	65.4926	51.3704	60.3966	51.0007	85.0651	49.5044	59.1543	77.1067	53.3791	53.7311	38.1907	50.8595	39.1957	45.7318	47.5941	45.897	78.7483	79.7609	53.3791
	8.3335	46.7036	57.7561	54.2571	52.4895	65.6473	51.0396	60.4041	51.1882	85.5872	49.5044	59.0062	77.2596	53.8089	53.8469	38.1907	50.4323	39.0536	45.7318	47.449	46.0988	79.0193	78.714	53.8089
	8.36683	46.7036	57.6844	54.1092	52.5852	65.5624	50.7846	60.5258	51.2366	85.6636	49.3867	58.7325	77.3096	54.2936	53.7472	38.0058	50.1469	38.8449	45.7318	47.7206	46.2484	78.7918	77.9622	54.2936
	8.40017	46.7867	57.111	54.1092	52.8859	65.5666	50.7439	60.7987	51.329	85.9497	49.3867	58.6065	77.4624	54.2936	53.767	37.6933	49.951	38.6808	45.677	47.8162	46.3326	77.8446	77.9622	54.2936
	8.4335	46.8145	56.7775	53.8565	52.9691	65.56	50.7566	60.835	51.2206	85.9769	48.8131	58.2022	77.4176	54.3018	53.6336	37.6349	49.2228	38.6071	45.6915	47.4641	46.0665	77.2719	78.2908	54.3018
	8.46683	46.9448	56.954	53.7092	52.5876	65.6116	50.8488	60.9774	50.864	86.0286	48.7728	57.8111	77.4624	54.4247	53.4494	37.5797	48.6042	38.5463	45.7494	47.2579	46.062	77.2144	78.1906	54.4247
	8.50017	46.5793	56.7111	53.7092	52.462	65.4711	50.9225	60.7502	50.3671	86.0041	48.4023	57.828	77.5405	54.7652	52.9624	37.189	48.1636	38.306	45.8096	47.0029	46.1576	77.2144	77.9047	54.7652
	8.5335	46.988	56.62	53.9338	52.4381	65.5858	50.9225	61.0782	50.2808	86.0041	47.7504	57.7178	77.7737	55.1953	53.0388	37.1597	47.8375	38.6808	45.9643	47.4648	46.2024	77.1968	75.7754	55.1953
	8.56683	46.6906	56.4466	53.8651	52.3753	65.3458	51.0573	61.1691	50.2442	86.133	47.6153	57.6775	77.848	55.6587	52.6701	37.507	47.8003	38.6989	46.1887	47.517	46.1447	76.9446	75.6131	55.6587
	8.60017	47.1836	56.4453	53.9815	51.8342	64.9807	51.0149	61.1619	50.2442	85.8742	47.2132	57.6775	77.8913	56.0196	52.5229	37.4482	47.586	38.7105	46.2581	47.3883	46.0575	77.1431	74.772	56.0196
	8.6335	46.77	56.4952	54.0577	51.3865	64.9807	51.0814	61.0257	49.7729	86.0829	47.2132	57.7268	78.0148	56.1351	52.226	36.9988	47.4865	38.7384	46.2353	47.4432	45.8971	77.4834	75.02	56.1351
	8.66683	46.8188	56.6242	53.8907	50.8697	64.8647	51.1842	60.8074	49.5156	86.1875	46.809	57.7268	78.0452	56.1997	51.6766	36.9222	47.3478	38.6634	46.0287	47.696	45.7281	77.3346	74.3054	56.1997
	8.70017	46.7792	56.3587	53.9388	50.9481	64.9226	51.0468	61.1567	49.5156	86.1875	47.1127	57.8475	78.1615	56.2669	51.8197	36.8718	47.2581	38.9318	46.0287	47.641	45.625	77.1431	75.1759	56.2669
	8.7335	46.9664	56.3241	53.9753	50.9481	64.7513	50.7504	60.868	49.4776	86.092	47.594	57.3677	78.2781	56.2879	51.8197	36.7924	46.7659	39.2471	45.8816	47.641	45.4051	77.1431	75.4478	56.2879
	8.76683	46.9042	57.2033	53.6448	50.534	64.7513	50.538	60.8137	49.6572	85.7058	47.6253	57.449	78.4179	56.1633	51.1879	36.7301	46.904	39.4641	46.2798	48.0403	45.3103	77.1607	74.9326	56.1633
	8.80017	47.1779	57.1363	53.6448	50.5794	64.5435	50.6258	60.9051	49.5844	85.7058	47.0889	57.3548	78.6821	56.3101	51.7527	36.612	46.8203	39.4641	46.2223	48.0453	45.5795	77.1431	75.4478	56.3101
	8.8335	47.2401	57.6602	53.1662	50.7498	64.7513	50.5727	61.1981	49.7962	85.6051	46.839	57.2399	78.845	56.0273	51.7527	36.6592	47.3694	39.4641	46.5036	47.9828	45.6883	76.6809	75.5999	56.0273
	8.86683	47.1892	57.6602	53.2662	50.9096	64.4622	50.5347	60.7876	49.4952	86.0193	46.4789	57.045	79.1996	55.7371	52.2848	37.2178	47.6932	39.2281	46.5694	48.0603	45.7597	76.5074	74.9986	55.7371
	8.90017	47.1892	57.6588	52.955	50.6127	64.1133	50.4619	60.4142	49.3929	85.9793	46.6632	56.8716	79.2743	55.2296	52.6482	37.0653	47.6826	39.088	46.4607	48.4549	45.8347	76.0075	75.5403	55.2296
	8.9335	47.1399	56.5469	52.955	50.4141	64.3343	50.2116	60.4142	49.3573	85.9793	46.7445	56.5811	79.29	54.9757	52.5553	37.194	46.9881	38.971	46.537	47.5329	45.4668	75.083	75.5403	54.9757
	8.96683	46.9209	55.1097	52.8659	50.4609	64.2211	49.9894	59.908	49.5398	85.6788	46.6632	56.0424	78.2956	54.6003	51.6891	36.5724	46.2124	38.5661	46.5291	46.4867	45.2764	74.5088	75.0616	54.6003
	9.00017	47.1391	54.7249	52.8659	50.4836	64.1127	50.143	59.2993	49.5971	85.1877	46.6632	55.3841	77.7552	54.4357	51.1384	36.2275	46.7863	38.252	46.6661	46.7084	45.5167	73.6858	75.2238	54.4357
	9.0335	46.6901	54.4882	52.7531	50.4051	63.9787	49.815	59.0319	49.4535	85.2766	46.0938	54.9817	77.7925	54.0419	50.6909	35.6954	45.8297	38.2405	46.5477	46.0314	45.434	72.9085	75.1614	54.0419
	9.06683	45.8018	54.6813	52.5202	50.0273	64.4586	49.3456	58.8574	49.1954	85.5256	45.6919	55.0742	77.8054	53.3674	49.9433	35.0878	44.4323	38.1269	46.3011	45.3584	44.8531	72.1183	74.0672	53.3674
	9.10017	45.1551	54.6139	52.3393	49.6659	64.7243	49.5245	59.2529	49.7061	85.7226	45.4156	55.124	77.847	53.3416	49.51	35.2541	43.53	38.1026	46.0857	44.7466	44.4568	72.1599	74.3315	53.3416
	9.1335	44.6531	54.5087	52.3393	49.4426	64.8719	49.6715	58.6895	50.2092	85.9912	45.181	55.2776	77.8915	53.2571	49.3181	35.6535	44.3977	37.9227	46.1212	44.4289	44.5296	71.9653	74.0067	53.2571
	9.16683	44.5029	54.5087	52.3393	49.0992	64.719	49.0716	58.5799	50.0771	85.0674	45.3987	54.7576	78.0631	53.5691	49.0206	35.6781	45.2626	38.0428	46.2412	44.5207	45.2853	71.2703	74.2214	53.5691
	9.20017	44.4349	54.8083	52.1269	49.0966	64.8899	49.1382	58.7792	49.9393	84.8648	45.5373	55.0358	78.2472	53.8721	49.0448	35.7997	45.5024	38.2475	46.0109	45.123	45.9579	71.2619	74.4398	53.8721
	9.2335	44.6851	55.2352	52.1627	49.4147	64.9604	49.7939	59.1302	49.9929	85.5826	45.6003	56.4237	78.3166	54.1253	48.7612	35.9631	46.2907	38.2475	46.1166	45.8224	46.0067	71.6178	73.9884	54.1253
	9.26683	45.0895	55.5052	52.0945	49.4147	64.9316	49.7939	59.1302	49.7812	86.6162	45.6003	56.5556	78.3166	54.1344	48.7613	36.1522	46.6641	38.2189	46.1166	45.4832	45.977	71.5746	73.9884	54.1344
	9.30017	46.3135	55.3942	52.0077	49.4147	65.0622	50.0669	59.5689	49.7997	87.2635	45.9367	56.5556	78.4608	54.4103	49.6623	36.1881	47.0302	38.7901	46.3098	45.0642	46.0736	71.5746	74.4185	54.4103
	9.3335	45.0547	55.5052	52.0245	49.7352	65.4154	50.4196	59.6987	49.7997	87.4984	46.431	56.9263	78.4529	54.5367	50.2725	36.5056	47.0302	38.7901	46.6118	45.3725	46.0736	71.5746	74.6071	54.5367
	9.36683	45.0979	55.5052	52.1453	49.9465	65.4686	50.5202	59.7602	49.6796	87.5642	46.5868	56.6908	78.5212	54.6679	49.7959	36.75	47.0302	39.2081	46.9298	45.6564	46.2283	71.1533	74.6021	54.6679
	9.40017	44.8797	55.7812	52.2723	49.951	65.574	50.6685	59.7105	49.766	86.1853	46.3713	56.3289	78.7066	54.5367	49.8222	36.8115	46.4613	39.2441	46.7112	45.6564	46.2283	71.2413	73.491	54.5367
	9.4335	44.4998	56.1536	51.843	49.6134	65.574	50.6805	59.6302	49.8225	86.1853	46.9708	56.418	78.8612	54.7719	49.7118	36.9437	46.1948	39.1255	46.691	45.8395	46.3955	70.942	72.9902	54.7719
	9.46683	44.9407	55.9694	52.3	49.6319	66.2366	50.7593	59.5265	49.7173	84.7258	47.0892	55.9349	79.3278	54.8207	49.645	37.0359	47.0917	39.4278	47.4963	45.8395	46.4764	70.9921	72.5358	54.8207
	9.50017	44.6743	55.8417	52.0116	49.7337	66.9189	51.0604	59.1518	50.2256	84.4713	47.0892	56.3505	79.0649	54.3235	50.3132	37.19	47.6153	39.7759	48.4101	45.7772	46.8501	70.9921	73.3765	54.3235
	9.5335	44.8581	55.8417	52.2112	49.3387	67.5017	50.7693	58.9411	50.056	84.4407	46.7526	56.1859	78.3858	54.4705	50.9316	37.2821	48.0555	40.0474	48.6136	46.0535	47.6715	70.6255	73.8292	54.4705
	9.56683	44.4908	55.7418	51.8869	49.0595	68.2872	50.0369	58.8792	50.0072	83.4152	46.5992	56.3075	78.1603	54.4705	50.9201	37.4896	47.9247	40.0639	49.2688	46.0625	47.2587	70.6255	73.5189	54.4705
	9.60017	44.2886	55.6922	51.7574	48.7352	68.9	49.6979	58.517	49.9193	83.0707	46.838	56.0351	78.3183	54.6696	51.1099	37.5471	47.6944	40.1076	49.778	46.1557	47.0707	70.799	72.9279	54.6696
	9.6335	44.4571	55.8716	51.4696	48.6401	69.4594	49.5885	58.0158	49.7664	83.1011	46.9674	56.1093	78.6743	54.708	51.1099	37.5688	47.1342	40.1931	50.0202	46.1611	47.3387	70.8971	72.1419	54.708
	9.66683	44.9683	55.9622	51.029	48.8376	70.5297	49.496	57.8422	49.8526	83.0707	46.4752	55.9454	78.9655	54.6671	51.1099	37.6768	46.151	40.3007	50.393	46.3263	47.557	71.4547	72.2671	54.6671
	9.70017	44.849	56.1134	50.6408	48.9256	71.8269	49.5634	57.7132	49.9942	82.1512	46.5814	56.2004	79.1108	54.8153	51.1099	37.7523	46.2756	40.4259	50.5635	46.8825	47.5727	72.1727	71.9226	54.8153
	9.7335	44.9947	56.2705	50.7147	48.8645	72.9356	49.7179	57.7132	50.1004	82.1813	45.9702	55.5714	79.1416	55.1019	51.5548	37.7791	47.0138	40.7566	50.6461	47.2948	48.2285	72.4611	71.9591	55.1019
	9.76683	45.3362	56.4473	50.7608	48.4669	73.44	49.751	57.7745	50.1344	81.1933	45.36	54.9443	79.3995	55.2041	51.8916	38.1817	47.138	41.3112	51.0249	47.2948	48.7396	73.4806	71.8161	55.2041
	9.80017	45.0118	56.3188	50.7778	48.0412	73.9158	49.7687	58.3632	50.2724	82.0418	45.7789	54.9758	79.9346	55.2454	52.0531	38.6001	47.0494	41.9313	51.2623	47.7738	49.6149	74.2266	72.1208	55.2454
	9.8335	45.6393	56.4156	51.1147	48.1991	74.7917	50.0112	58.7767	50.5847	82.423	45.6005	55.1583	80.5892	55.0427	52.1406	38.8451	47.0494	41.9729	51.1014	48.2436	49.5902	74.8843	72.3263	55.0427
	9.86683	44.9041	56.7462	51.0992	48.2206	74.7696	50.2657	58.49	50.9306	82.3233	45.6713	55.1919	80.9253	55.1864	51.8677	38.8451	47.0494	41.7814	51.1609	48.2436	49.8231	75.2265	71.8596	55.1864
	9.90017	44.9041	56.9736	50.9448	47.9075	74.534	50.3314	57.8761	51.0869	82.3446	45.6022	55.3209	81.008	54.9438	51.7901	39.0047	47.4031	42.0578	50.6446	48.1857	50.0205	75.4471	72.3486	54.9438
	9.9335	45.3119	57.3446	51.1838	47.8571	74.534	50.3799	58.4854	51.2594	83.2432	45.6022	55.5566	81.2636	55.0869	51.7799	38.882	47.3623	42.1685	50.8641	47.6165	50.3292	75.5518	72.3923	55.0869
	9.96683	45.0412	57.1233	51.3125	47.9738	74.1206	50.541	59.1518	51.3861	83.3437	45.4468	55.4288	81.1464	55.3443	51.8603	38.882	46.9698	42.3775	50.6827	46.7389	50.3536	76.9447	72.303	55.3443
	10.0002	45.0412	57.1004	51.3265	47.9738	74.1206	50.5665	59.1874	51.3291	82.2712	45.4468	55.482	80.9807	55.5215	52.051	38.5112	47.4623	42.1561	50.8669	46.5083	50.6711	78.8986	72.4119	55.5215
	10.0335	45.0412	56.9173	51.5499	48.2054	73.3586	50.6406	59.9083	51.0461	82.3884	45.2415	55.7464	81.1195	55.4276	52.311	38.0232	47.8614	41.9772	50.8669	46.3117	50.6741	79.164	72.5306	55.4276
	10.0668	44.8184	56.7799	51.7687	48.2913	72.8998	50.776	60.2648	50.7231	81.79	45.074	56.1231	81.2359	55.4831	52.115	38.2369	47.9887	41.7349	50.9514	46.0019	50.6741	80.7348	72.5002	55.4831
	10.1002	44.5785	56.7799	51.8941	48.5337	72.3371	50.8144	60.664	50.7231	82.2492	45.3452	57.024	81.2359	55.4964	52.3824	37.9781	48.7671	41.7699	50.9265	45.6994	50.8059	81.8665	72.5002	55.4964
	10.1335	44.4561	56.8638	51.9853	49.117	71.3213	50.8144	61.0262	50.7628	81.1162	45.2252	58.2675	81.4667	55.6566	52.5848	37.7541	49.633	41.5944	51.1069	45.787	50.9641	83.521	72.685	55.6566
	10.1668	44.4561	57.0262	52.1869	49.1753	70.2682	51.3517	61.6527	50.7628	80.6567	45.4342	58.8323	81.5571	55.9968	53.044	37.6884	49.8063	41.6624	51.0223	45.787	51.2589	85.4575	72.729	55.9968
	10.2002	44.9414	57.09	52.6336	50.756	69.7086	51.906	62.0495	51.14	80.4479	45.8458	59.6308	82.1623	56.219	53.3075	37.7334	49.8582	41.3488	51.0541	46.319	51.8081	86.5225	72.7594	56.219
	10.2335	44.9414	57.4192	52.6924	51.7837	69.407	52.3934	62.3222	50.9432	80.5036	46.2575	60.4758	82.612	56.5657	53.9934	37.8726	49.9795	41.9487	51.1441	46.6096	52.2201	87.6973	73.6918	56.5657
	10.2668	45.3421	57.7771	53.1876	52.0524	69.3667	52.6271	63.1455	51.1374	80.8737	45.9916	60.4758	83.1477	57.2866	54.796	38.1689	49.9512	42.112	51.0356	47.1865	52.407	88.8237	73.1539	57.2866
	10.3002	46.0071	57.9324	54.0305	52.3743	69.3237	52.7585	64.2983	51.4051	81.4015	46.2129	60.8635	83.451	57.891	54.7085	38.171	50.0068	42.4079	51.0224	47.9828	52.6858	89.5436	74.4133	57.891
	10.3335	46.1729	58.1388	54.3588	52.5373	69.4467	53.1592	64.7577	51.898	81.9154	46.3411	61.0384	83.8445	58.4777	55.0797	38.1736	50.205	42.909	51.3675	48.2531	52.9004	90.485	74.749	58.4777
	10.3668	46.5215	58.4046	54.4727	52.5627	69.3564	53.6994	65.0613	52.203	82.3877	46.8986	61.4554	83.9532	59.0684	55.5008	38.2011	50.1347	42.9587	51.8414	48.316	53.2747	90.8249	75.1534	59.0684
	10.4002	46.7523	58.9235	54.704	52.7716	69.1186	53.9473	65.189	52.5022	82.6296	46.8133	62.4058	84.5893	59.7645	55.7995	38.211	50.1786	43.0001	51.721	47.9129	53.5373	91.084	75.6086	59.7645
	10.4335	46.9918	59.3249	55.5383	53.6136	69.1186	54.0329	65.671	53.1784	82.6825	47.6102	62.8856	85.0992	60.1942	55.9922	38.3542	50.3886	42.8795	52.1182	48.061	53.5806	92.1502	75.5448	60.1942
	10.4668	47.1697	59.9524	56.68	54.4023	69.239	54.1643	66.3499	53.1784	84.5553	47.6641	63.0552	85.1686	60.4235	56.172	38.3633	50.4605	42.9048	51.566	48.1426	53.4884	92.3316	76.2392	60.4235
	10.5002	47.3285	59.99	56.7074	54.682	69.41	54.6221	67.0324	53.1836	86.8284	47.7384	63.4656	85.5358	60.3791	55.4891	38.5322	50.2905	43.1423	51.6381	47.8073	53.4925	93.2704	77.0929	60.3791
	10.5335	47.8459	60.1224	56.7688	54.7025	69.4609	54.9083	67.3165	53.1836	87.5085	47.9042	63.7314	86.606	60.5961	55.056	38.6659	50.438	43.2879	51.8775	48.2628	53.2508	93.8577	77.1318	60.5961
	10.5668	47.9658	60.2309	57.0087	54.7857	69.7886	54.6939	67.4114	53.2494	87.983	48.1443	63.8705	87.2528	60.8346	55.3674	39.033	50.3229	43.0611	51.8543	48.5016	52.9808	94.5065	77.3402	60.8346
	10.6002	48.4727	60.2309	57.1134	54.9231	69.7867	54.5019	67.2181	52.9563	88.5738	48.6846	64.0238	87.3141	60.7938	55.3497	39.2143	50.4312	43.0709	51.8219	48.4734	53.0386	93.9806	77.6408	60.7938
	10.6335	48.7216	60.3858	57.1099	55.1144	69.7849	54.6595	67.4103	52.8288	88.5738	49.1879	64.0293	87.3018	60.8829	55.3664	39.2083	50.076	43.0603	52.0323	48.3382	52.9167	95.4666	78.2696	60.8829
	10.6668	48.7559	60.2619	56.9542	55.3844	69.5467	54.5578	67.6737	52.7124	88.5566	49.3252	63.8671	87.7631	61.0436	55.5895	39.4378	50.076	43.092	51.9725	48.5401	52.6396	95.1279	78.8603	61.0436
	10.7002	48.7456	60.3237	56.8071	55.4714	69.5687	54.4952	67.657	52.9827	87.3618	49.5827	63.9127	87.7575	61.2185	55.8422	39.4534	50.0895	42.9137	51.8241	48.9788	52.5898	95.2498	78.7081	61.2185
	10.7335	48.7456	60.2231	56.7749	55.7451	69.6275	54.3103	67.6622	52.8764	88.6437	49.7972	64.0172	87.7861	61.3646	55.6287	39.4927	51.0003	42.6971	51.8241	48.8428	53.0486	95.3605	78.3625	61.3646
	10.7668	48.6857	60.2006	56.7986	56.0612	69.1091	54.0831	67.5363	52.6148	88.9017	49.7972	64.6987	87.68	61.3019	55.8857	39.507	50.8787	42.5534	51.6089	48.801	52.906	94.8246	77.7341	61.3019
	10.8002	48.6081	60.2006	56.7899	55.9543	68.9481	54.1828	67.5477	52.8126	89.1605	49.928	65.0473	88.148	61.1619	55.8997	39.6793	50.6413	42.3664	51.495	48.9765	52.7213	94.9961	77.2193	61.1619
	10.8335	48.7307	60.3391	56.7422	55.8216	68.9481	54.5065	67.5883	52.6148	89.9836	49.8062	65.1775	88.148	61.1321	56.2027	39.4958	51.7703	42.3293	51.4365	49.211	52.5622	95.1861	76.7183	61.1321
	10.8668	48.5739	60.2064	56.7422	55.813	68.9481	54.469	67.7663	52.5734	90.2152	49.7218	65.4942	87.9576	61.197	56.3222	39.2919	51.9472	42.299	51.3674	49.3781	52.6071	95.2359	76.3759	61.197
	10.9002	48.5739	60.2231	56.7422	55.5781	68.9674	54.2654	67.9904	52.1842	90.6735	49.6626	65.9106	87.9453	61.2373	56.5646	39.4896	52.4629	41.9494	51.241	49.3353	52.3038	95.4932	76.2909	61.2373
	10.9335	48.5739	60.131	56.8384	55.5421	68.9796	54.093	68.4009	52.1842	91.6497	49.7522	66.0729	87.9258	61.2653	56.4153	39.1635	52.4629	41.9408	51.0723	49.7375	52.0707	95.8201	75.821	61.2653
	10.9668	48.6237	59.7902	56.8384	55.2769	68.6153	53.9874	68.5633	52.0566	92.8767	49.407	65.2271	87.9146	61.189	56.203	38.9129	52.7558	41.6198	50.9742	50.1429	52.5468	96.0718	75.7992	61.189
	11.0002	48.0825	59.7902	56.7004	55.7001	68.672	54.0361	68.7047	52.1395	92.8767	49.5613	64.8995	87.8876	61.2131	56.3159	38.9775	52.6439	41.7222	51.007	49.6864	52.425	96.0067	75.6717	61.2131
	11.0335	48.8835	60.0215	57.0113	55.4504	68.7043	53.9999	68.773	52.1395	92.8767	49.3718	64.4651	87.9325	61.189	56.1855	39.1412	52.87	41.7146	51.007	49.3831	51.5393	95.8436	75.4815	61.189
	11.0668	49.0543	59.8105	57.1674	55.9497	68.6615	53.7787	68.9976	52.2826	92.2833	49.6357	64.2982	87.9665	61.1105	56.9373	39.2293	52.4316	41.7121	50.9742	49.9939	51.6012	96.0508	75.3152	61.1105
	11.1002	50.1036	59.9792	57.0698	56.1344	68.7777	53.6744	69.2974	52.6151	92.2833	49.9333	64.0721	88.0523	61.1105	56.5046	39.2013	53.0768	41.7889	51.0004	50.4186	51.8432	96.2232	76.049	61.1105
	11.1335	50.3374	59.9792	56.9856	56.0487	68.3972	54.2784	69.8299	52.8675	92.6388	49.982	64.0116	87.9665	61.1105	56.1344	39.2224	52.3846	42.0358	50.6263	50.524	51.828	97.0422	75.4596	61.1105
	11.1668	49.4056	60.1415	56.8085	56.0487	68.3056	54.2746	70.2112	52.9678	92.9502	49.5562	63.3989	88.0233	61.0657	56.1344	39.2801	52.6805	41.8598	50.9909	50.4656	51.7113	97.3557	76.0644	61.0657
	11.2002	49.4056	60.1781	56.775	56.2544	68.1632	54.4429	70.9151	53.078	91.927	50.0837	63.4204	88.1399	61.0091	56.1344	39.166	53.0329	41.9036	50.9105	50.5861	51.7375	97.8024	75.8303	61.0091
	11.2335	49.4056	60.3289	56.775	56.3	68.2251	54.6353	71.2525	53.2086	92.312	49.3905	62.9408	88.1399	61.0911	56.3412	39.4014	52.7833	42.2289	51.0236	50.463	51.6499	97.9952	75.5924	61.0911
	11.2668	49.2749	59.3312	56.751	56.3	68.2251	54.3599	71.7731	53.1737	92.4644	49.4552	62.8997	88.0775	60.7737	56.1344	39.4655	53.332	42.4367	50.8986	50.3707	51.6892	98.9207	75.5193	60.7737
	11.3002	49.1992	59.3079	56.8399	56.4301	68.3867	54.6708	72.0567	53.1737	92.8043	50.7735	63.1457	88.0775	61.3575	56.1344	39.4825	54.145	42.6725	50.9416	50.3522	51.6892	98.9846	75.5193	61.3575
	11.3335	49.2165	60.5643	56.9682	56.4951	68.2338	54.8935	72.3662	53.2509	93.7004	50.146	63.0361	88.0039	61.1018	56.4098	39.4825	54.4569	42.8212	51.1744	50.6222	51.4867	99.95	75.6928	61.1018
	11.3668	49.347	59.3629	56.8866	56.4467	68.2931	55.2086	72.6066	53.2509	94.3033	50.9612	63.0361	88.003	61.2214	56.2907	39.4518	54.6591	42.8226	51.3885	51.0161	51.5742	100.285	76.3	61.2214
	11.4002	49.4011	59.441	56.8866	56.3499	68.4067	55.2605	72.8015	53.0824	94.5238	51.0491	63.0036	87.4105	61.2214	56.0492	39.3409	54.8503	42.8995	51.4743	50.8382	51.5406	100.164	77.298	61.2214
	11.4335	49.3284	58.5827	57.0403	56.3593	68.4601	55.043	72.8015	52.839	94.6844	51.073	63.0036	86.9967	61.1394	56.151	39.6667	54.7934	42.6898	51.6841	50.7601	51.7187	100.164	76.0256	61.1394
	11.4668	50.026	59.0932	57.0403	56.3892	68.4767	54.7686	73.0102	52.8311	95.8766	51.7478	63.3774	86.9967	61.1452	55.9591	39.5931	55.3233	42.8337	51.896	50.7263	51.7599	100.668	76.5144	61.1452
	11.5002	50.8319	58.3464	57.2625	56.5023	68.5012	54.4975	73.1685	52.8311	96.0962	51.8129	63.7335	86.7724	61.0439	55.8173	39.2787	54.8401	43.0323	51.9918	51.0179	51.886	100.61	77.1781	61.0439
	11.5335	50.99	58.3204	57.4527	56.8417	68.58	54.2324	73.3747	53.0934	96.25	51.9836	63.6665	86.5726	60.7372	56.0954	39.0386	54.7952	43.1493	52.3931	51.5963	51.5439	99.7692	77.775	60.7372
	11.5668	51.1516	57.9313	57.4253	56.8417	68.2578	54.2324	73.4047	53.2277	96.4022	51.9836	63.5549	86.6058	60.2587	55.9661	38.9397	55.0445	42.7343	52.4877	51.5576	51.2962	99.9434	77.6711	60.2587
	11.6002	51.2287	58.1186	57.4253	56.7719	67.8637	54.3406	73.1685	53.2277	97.4564	51.8867	63.3836	86.5324	60.3047	56.1929	39.0215	55.0739	42.6355	52.908	51.5649	51.2962	99.8563	77.3512	60.3047
	11.6335	51.2454	58.5373	57.435	56.5472	67.8637	54.3406	73.1685	53.6371	97.6168	52.0403	63.0914	86.3782	60.1762	56.3124	39.2792	54.7461	42.5663	53.0302	51.5328	51.0805	99.0208	77.0782	60.1762
	11.6668	50.8616	58.5373	57.5939	56.6641	67.803	54.3406	72.644	53.1685	97.6415	52.0403	62.8124	86.3374	60.0939	56.3875	39.1704	55.2807	42.4541	53.1927	51.2742	50.8551	98.0241	76.731	60.0939
	11.7002	50.9528	59.0957	57.5895	56.6367	67.8246	54.36	71.9297	53.1411	97.6788	52.0403	62.8226	86.2093	60.0189	56.3109	39.1685	54.9523	42.3417	53.4062	51.2416	50.8551	97.1124	76.6194	60.0189
	11.7335	50.5119	59.3225	57.5788	56.7693	67.7475	54.3168	71.6102	53.2265	97.6415	51.4935	62.9688	86.1541	59.9806	56.3409	39.2275	54.8223	42.1878	53.4062	50.3598	50.7848	96.9061	76.6194	59.9806
	11.7668	50.5119	59.297	57.3907	56.7143	67.6335	54.3101	71.7106	53.2385	97.618	50.7151	62.9909	85.951	59.9958	56.3472	39.2275	54.8223	41.9496	53.435	49.7873	50.6974	95.9812	76.6194	59.9958
	11.8002	50.3377	59.0203	57.2685	56.7693	67.6335	54.2433	71.6828	53.2188	97.5933	50.1098	62.8404	86.0697	59.9571	56.8543	39.1452	54.9663	41.6749	53.4697	50.5473	50.5453	95.9559	75.7879	59.9571
	11.8335	50.2015	58.9434	57.1626	56.7537	67.6335	54.3204	71.6292	53.0009	97.0371	50.2978	62.8183	86.3964	59.8516	56.8543	39.0511	54.9798	41.6749	53.4903	50.4292	50.4113	95.5436	74.4425	59.8516
	11.8668	50.6377	58.8723	57.1626	56.3835	67.5944	54.1535	71.4289	52.7442	97.9305	50.4783	63.1282	86.1498	60.0103	56.761	39.1017	55.2113	41.3999	53.4932	50.3132	50.3596	94.9257	74.4425	60.0103
	11.9002	50.6377	58.8505	57.1626	56.4693	67.7831	54.1962	71.4896	52.4693	98.0156	50.6105	63.1282	86.1252	60.3453	56.8979	39.1846	55.118	41.2941	53.4214	50.2122	50.505	94.2996	74.3095	60.3453
	11.9335	51.4477	58.8447	56.967	56.5086	68.0763	54.0332	71.4951	52.6464	97.775	50.6358	62.8902	86.0599	60.7286	56.9659	39.228	55.946	41.3318	53.3436	51.0107	50.4782	94.2521	75.6246	60.7286
	11.9668	52.0164	59.4911	57.039	56.4684	68.0763	54.1416	71.2498	52.4841	97.5765	50.6358	63.0318	85.8479	60.7486	56.2809	38.8441	56.4901	41.2992	53.2974	51.0884	50.2452	94.2521	75.4264	60.7486
	12.0002	52.1111	59.5072	57.1043	56.5002	68.0151	54.0877	70.9299	52.5102	97.5952	50.5969	63.0318	85.953	60.273	56.6352	39.103	56.3976	41.2219	53.2418	51.1537	50.4121	93.7165	75.4264	60.273
	12.0335	51.9739	59.4911	57.2506	56.5752	67.9699	53.5682	70.882	52.5102	97.5765	50.6402	63.3071	86.3816	60.4363	56.5477	39.3209	56.8102	41.1371	53.2595	51.0707	50.5932	93.6277	75.3699	60.4363
	12.0668	52.2064	59.8188	57.414	56.6185	68.0208	53.914	70.5898	52.5522	98.0061	50.9901	62.8297	86.8698	60.4336	56.6418	39.3882	57.2665	41.0439	53.2797	51.121	50.7233	93.4511	75.7617	60.4336
	12.1002	52.131	59.7297	57.4285	56.9634	68.1188	54.2276	70.5898	52.3626	98.7107	51.4576	62.3814	87.0596	60.4336	56.5649	39.3196	57.2476	40.8858	53.2587	51.0744	50.7696	93.0306	75.2849	60.4336
	12.1335	52.131	59.7413	57.5425	56.9634	68.0094	54.0546	70.5898	52.292	98.7107	51.4006	62.3072	87.1821	60.1906	56.659	39.4552	57.2414	41.066	53.5573	51.2574	50.9924	92.7128	75.7224	60.1906
	12.1668	52.6975	59.8188	57.6702	57.0032	68.1301	54.0412	70.3494	52.5679	100.489	51.2933	62.2402	87.0021	60.1969	56.6751	39.4637	57.7504	40.831	53.9887	51.3118	51.322	92.4066	76.7262	60.1969
	12.2002	53.0338	59.6349	57.7775	56.9664	68.1301	54.2209	70.4868	53.1456	101.162	51.4216	62.166	87.5071	60.3302	57.0078	39.5442	57.7504	40.9381	54.1089	51.372	51.0992	91.8879	77.3252	60.3302
	12.2335	53.5934	60.0267	57.879	57.1831	68.1625	54.2209	70.5302	53.5185	101.84	51.4688	62.1391	87.9499	60.3969	57.5621	39.68	58.5958	40.8567	54.0682	51.372	51.4107	91.3551	77.2122	60.3969
	12.2668	53.8007	60.3701	57.9471	57.0502	68.3331	54.4007	70.5649	53.5634	101.84	51.5921	62.1172	87.9783	60.4535	57.0969	39.8775	58.0582	40.5829	54.0682	51.372	51.1739	91.2958	76.6063	60.4535
	12.3002	53.5906	60.0267	57.9774	56.8856	68.4688	54.2883	70.8167	53.5752	101.796	51.4688	61.7734	88.2306	60.648	57.2204	39.9212	58.1235	40.5829	54.0224	51.2751	51.2129	90.251	76.5151	60.648
	12.3335	53.1616	59.9915	58.0192	56.8856	68.6705	54.2347	70.8384	53.5752	101.696	51.4688	61.708	88.2868	60.7147	57.5889	39.9376	57.6316	40.6424	54.0555	51.2982	51.1902	90.7383	76.1457	60.7147
	12.3668	53.4361	59.6948	58.0192	56.9904	68.7127	54.4813	70.7315	53.6012	102.27	51.8971	61.708	88.0045	60.7816	58.3956	39.6114	57.3179	40.665	54.0555	51.2982	51.1179	90.5351	75.8963	60.7816
	12.4002	53.8428	59.3045	57.9588	56.8856	68.8675	54.4813	70.9002	53.4613	101.474	51.593	62.2953	87.6451	60.7816	58.869	39.5736	57.887	40.6972	54.1249	51.4296	51.0732	89.7561	75.8963	60.7816
	12.4335	54.1994	59.3629	58.0217	56.9281	68.8675	54.5233	70.7311	53.6572	100.722	51.5119	62.3041	88.1068	60.7816	59.3377	39.9109	58.0572	40.6984	54.2449	51.4785	51.0691	89.6286	76.0551	60.7816
	12.4668	54.3033	59.0115	57.9293	57.129	68.8675	54.5233	70.9347	53.8722	100.813	51.572	63.0228	87.836	61.4023	58.7091	39.7424	57.9031	40.5171	54.3955	51.2982	50.5505	88.9475	75.5381	61.4023
	12.5002	54.3995	59.2798	57.8665	57.1474	68.8067	54.5233	70.9347	53.9816	100.668	51.4264	63.0007	87.9945	61.4023	59.3234	39.9776	57.929	40.5213	54.338	51.2151	50.5456	88.8637	75.9582	61.4023
	12.5335	54.2467	58.9286	57.6415	57.0176	68.5653	54.4079	70.7257	54.1345	100.316	50.7665	62.8838	87.7586	60.6855	59.3246	40.315	58.4044	40.397	54.5102	50.7776	50.5677	89.4559	75.9582	60.6855
	12.5668	53.931	58.8197	57.5262	56.8579	68.4715	54.4387	70.5516	54.1379	100.316	51.356	63.2032	87.721	60.3626	58.9785	40.1322	58.349	40.4496	54.6954	50.7776	50.463	90.1207	75.8448	60.3626
	12.6002	53.4658	58.7458	57.4351	57.0378	68.1824	54.3563	70.1327	53.8289	100.639	51.356	63.2032	87.6876	60.3581	59.1527	40.4091	58.5077	40.5275	54.7263	49.9652	50.7888	89.5192	76.3635	60.3581
	12.6335	53.7404	58.8783	57.6581	57.0671	68.1824	54.4593	69.9551	53.3557	100.911	50.9401	63.2032	87.7162	60.3536	59.3274	40.4967	59.2172	40.5816	54.9803	49.9652	50.701	90.1445	77.3222	60.3536
	12.6668	53.9301	58.9922	57.6581	57.0992	68.1177	54.5569	69.9464	53.4453	101.161	51.356	62.9212	87.7104	60.8359	58.8719	40.1447	59.4622	40.6104	54.9609	49.8988	50.7472	90.1445	77.3222	60.8359
	12.7002	53.9612	59.0053	57.4994	57.1927	67.9543	54.5569	69.8983	53.5108	101.058	51.3126	62.5072	87.7428	60.4679	58.682	40.2708	59.3751	40.4982	54.8835	50.0254	50.7174	89.5733	77.0879	60.4679
	12.7335	54.2022	59.0053	57.587	57.1927	67.6957	54.5833	69.8983	54.1197	101.058	51.5973	62.5072	87.5203	60.4679	58.5119	40.366	59.6733	40.7786	54.9471	50.0254	50.6547	89.5733	76.4283	60.4679
	12.7668	53.915	58.9922	57.8102	57.2058	67.5995	54.6169	69.8983	54.3818	100.876	50.8968	62.5072	87.1733	60.53	58.6272	40.2531	59.5535	40.7762	55.0919	50.0762	50.535	90.3974	76.0152	60.53
	12.8002	53.9104	59.0053	58.0809	57.1658	67.6957	55.0082	69.8588	54.1068	100.935	50.309	62.1367	87.3957	60.4949	58.817	40.286	59.4061	40.8739	55.066	50.596	50.5589	90.4368	75.2631	60.4949
	12.8335	54.1281	59.0053	58.5923	57.1934	67.6395	55.172	69.875	53.976	101.299	50.7003	62.3586	87.6059	60.4949	58.8815	40.2394	59.2682	40.9573	55.061	50.3294	50.5073	89.9067	74.3266	60.4949
	12.8668	53.9104	58.9792	58.7982	57.0772	67.6395	55.065	69.5064	53.7967	101.082	50.9525	61.9446	87.7127	60.4949	58.9362	40.1863	59.1888	41.0902	54.7533	50.7041	50.525	89.6352	74.4369	60.4949
	12.9002	53.9493	58.9631	58.6567	57.0772	67.7707	55.1764	69.1989	53.8936	100.528	51.0018	61.784	87.564	60.8168	59.1027	40.1863	58.7016	41.23	54.8723	50.7686	50.525	89.1683	74.0888	60.8168
	12.9335	53.4355	58.9009	58.6762	56.8167	67.8983	55.3362	69.2732	53.9279	100.429	50.9037	61.4749	87.328	60.5676	59.2378	40.1777	59.0887	41.5949	55.18	50.835	50.525	89.1124	73.7979	60.5676
	12.9668	52.7476	58.0881	58.9055	56.9498	67.8983	55.5142	69.2927	54.309	100.181	51.5875	60.8314	87.3538	60.4911	59.3085	39.9253	58.6174	41.7738	55.0323	50.8793	50.3904	88.399	73.7979	60.4911
	13.0002	52.7476	56.9397	58.4772	57.2305	67.8152	55.5863	69.3811	53.9279	99.8078	51.7724	60.6264	87.3466	60.3029	59.2497	39.4474	58.9717	42.3809	55.2535	50.8232	50.1798	88.0196	73.627	60.3029
	13.0335	52.709	56.5918	58.1885	57.1532	67.8544	55.5145	69.3811	53.8759	99.8437	51.1354	60.3996	87.1151	59.9881	59.4629	39.2963	59.1734	43.1035	55.3815	50.9778	50.1569	87.8623	73.7948	59.9881
	13.0668	52.4801	56.8326	57.7643	57.3019	67.8805	55.4112	69.551	53.8401	100.026	50.8834	60.1987	86.902	59.715	59.8682	39.2963	59.1734	43.1348	55.6228	50.871	50.1346	88.3489	74.1642	59.715
	13.1002	52.193	57.2398	57.5179	57.485	68.0178	55.5975	69.847	53.8401	99.9401	51.1489	60.3114	86.6387	59.8311	59.8669	39.4077	59.0479	43.4964	56.1055	50.8719	50.0764	88.2298	74.0223	59.8311
	13.1335	51.8129	56.9832	57.1131	57.5174	67.9652	55.6548	69.9481	54.1041	99.4684	51.3259	60.4626	87.1936	59.6643	60.3353	39.6087	58.6823	43.5221	56.0378	50.8821	49.9454	88.166	73.844	59.6643
	13.1668	51.0053	56.9832	56.2462	57.6482	67.9637	55.7813	69.8089	53.8473	98.5036	51.3539	60.4626	87.2433	59.3343	59.8388	39.5715	58.484	43.6114	56.1829	50.8821	49.845	88.1117	74.1781	59.3343
	13.2002	50.492	56.4019	55.7572	57.9897	67.9112	56.0415	69.8089	53.8731	97.602	51.2788	60.4808	87.4596	59.2711	59.781	39.2517	57.6978	43.9445	56.5842	50.999	49.7543	88.0641	73.0007	59.2711
	13.2335	50.4274	56.3044	56.0875	58.0631	68.037	55.8874	69.6208	53.5701	97.3013	50.7979	60.1266	87.1058	59.1149	59.7208	39.375	58.3822	43.6935	56.5511	50.866	49.6602	88.1688	73.1537	59.1149
	13.2668	50.869	56.9832	56.0875	58.2546	68.0307	55.8874	69.386	53.5959	97.3719	50.008	60.3214	87.1058	59.0673	59.7208	39.2679	59.1931	43.6985	56.4272	51.1267	49.6602	88.3068	72.7705	59.0673
	13.3002	50.7997	57.6078	56.0875	58.318	68.0707	55.8874	69.0112	53.5576	96.9334	49.157	60.5065	86.925	58.9009	59.781	39.2329	58.4158	43.6985	56.4803	51.3467	49.5732	88.3068	72.3668	58.9009
	13.3335	51.2231	57.5849	56.2883	58.3806	68.0065	56.1176	69.3069	53.6221	97.5133	49.3508	60.5065	87.3679	58.6428	59.8388	39.3316	57.5567	43.5036	56.3908	51.1891	49.8615	88.1688	72.4515	58.6428
	13.3668	50.8645	57.991	56.2923	58.3806	68.0065	56.2813	69.2784	53.7882	97.5133	50.4005	60.3655	88.1295	58.3911	59.402	39.2561	56.6785	43.6583	56.466	51.4882	49.8615	88.0354	72.3861	58.3911
	13.4002	51.2882	58.2588	56.3081	58.4769	68.0504	56.3453	69.4182	53.526	97.8798	51.3079	60.3671	88.4692	58.4052	59.3624	39.3148	57.4548	43.7725	56.5431	51.6686	49.9968	87.6547	72.2723	58.4052
	13.4335	51.5031	57.918	56.136	58.3676	67.8384	56.3709	69.3375	53.5594	98.5708	51.3261	59.8917	88.5042	58.3021	59.342	39.1914	57.3609	43.8027	56.5013	51.6686	50.2125	87.0605	71.8007	58.3021
	13.4668	51.1833	57.918	56.1597	58.4022	67.7799	56.5244	69.5417	53.551	98.9364	51.5749	59.8917	88.3646	58.3746	59.0884	39.1914	57.333	43.7545	56.3606	51.4863	50.5123	85.995	72.5487	58.3746
	13.5002	51.2529	57.7345	56.4945	58.3116	67.7436	56.5408	69.6296	54.092	98.7411	51.3593	60.0058	88.3889	58.3873	59.2609	39.2115	56.8683	43.7414	56.3606	51.7157	50.8244	85.1618	72.7104	58.3873
	13.5335	50.8725	57.7488	56.6594	58.4278	67.7975	56.4043	69.9168	54.2734	98.9065	51.8665	60.0074	88.0607	58.4572	59.3126	39.3081	57.1277	43.3445	56.3216	51.5295	50.4024	84.7956	73.0147	58.4572
	13.5668	49.7742	57.7502	56.7203	58.3852	67.6723	56.4728	70.034	54.4982	99.4378	52.453	60.1632	88.7487	58.6957	59.3126	39.4851	56.77	43.1405	56.5374	51.5792	50.0621	84.5036	72.8899	58.6957
	13.6002	49.924	57.316	56.7755	58.3546	67.7632	56.6078	70.0886	54.5895	99.55	52.453	60.1705	88.8209	58.9416	59.0748	39.563	56.4364	43.2681	56.6888	51.4123	49.9382	84.3008	72.5853	58.9416
	13.6335	50.7385	57.4231	56.5397	58.3444	67.8051	56.6345	70.3555	54.4956	100.179	52.7452	60.2885	88.7569	59.1016	58.4021	39.6478	56.7258	43.3163	56.6888	51.3876	49.7028	83.7928	72.3596	59.1016
	13.6668	50.7385	57.7723	56.6557	58.1422	67.4932	56.7511	70.8295	54.5413	100.307	52.4088	60.2885	88.8747	58.764	58.8852	39.4559	56.7827	43.3321	57.0055	51.5846	49.2947	83.5273	72.1198	58.764
	13.7002	50.7385	57.4231	56.7231	58.1422	67.3174	56.7776	71.2365	54.5413	101.591	52.0393	60.7107	88.6481	58.5178	59.1014	39.6184	56.8956	43.3163	57.0542	51.1573	49.6373	83.2811	72.3596	58.5178
	13.7335	50.3486	57.3067	57.1982	58.1422	67.3296	56.809	71.2953	54.5483	102.734	51.7756	61.2034	88.6874	58.5324	58.5142	39.5112	56.8956	43.3422	57.0542	50.9461	49.6373	83.1999	72.3591	58.5324
	13.7668	50.5159	57.4231	57.3472	58.1198	67.5054	56.689	71.5859	54.444	103.179	51.3282	60.974	88.7302	58.8239	57.814	39.5121	56.9383	43.3285	57.1616	51.0796	49.9053	83.1776	71.9648	58.8239
	13.8002	51.1928	57.3346	57.3472	57.8817	67.5403	56.7157	71.8079	54.5871	103.04	51.3282	60.6065	88.9444	58.8727	57.7915	39.5486	56.3145	43.1923	57.3408	50.9874	49.9053	83.0539	71.5443	58.8727
	13.8335	51.6483	57.1528	57.4729	57.8817	67.5403	56.5966	72.0609	54.4175	103.904	51.673	60.6065	88.8265	58.9464	57.6489	39.5714	55.8025	43.2289	57.1713	50.9786	49.6546	82.4431	71.0855	58.9464
	13.8668	51.935	56.9871	57.3844	57.8205	67.5403	56.5966	72.1123	54.229	103.998	50.8815	60.6065	88.8265	59.0226	57.3806	39.5714	55.7489	43.3652	57.209	50.8764	49.256	81.9634	70.9026	59.0226
	13.9002	52.2099	56.9842	57.2971	57.7243	67.3601	56.2813	72.6035	53.9819	103.691	50.3497	60.6065	88.6565	58.9681	57.7738	39.5714	55.8334	43.4184	57.2126	50.8648	49.5276	81.6542	70.4945	58.9681
	13.9335	52.1654	57.3003	57.3631	57.7901	67.3601	56.2813	72.7551	53.9819	103.341	49.998	60.4856	88.485	58.9654	57.9017	39.601	55.6787	43.4316	56.6629	50.7114	49.3903	81.0033	70.2512	58.9654
	13.9668	51.8784	56.957	57.3631	57.6867	67.5238	55.9743	72.7925	53.8377	103.028	49.8381	60.4856	88.6522	58.257	57.9017	39.5152	55.2176	43.5239	57.0727	50.8202	49.2544	80.6984	71.1083	58.257
	14.0002	51.6765	56.8931	57.3631	57.5803	67.6996	55.8303	72.9994	53.5403	103.028	49.8179	60.2024	88.5006	58.3119	57.8329	39.6079	54.9412	43.9112	57.0154	50.9786	49.253	80.3101	71.8834	58.3119
	14.0335	51.7548	56.8931	57.0041	57.5409	67.6847	55.8243	72.9336	53.0726	102.426	49.8179	59.8279	88.6038	58.1373	57.5854	39.6445	54.4856	43.8462	57.0656	50.7285	49.2535	78.99	71.9241	58.1373
	14.0668	51.7548	56.8399	56.7469	57.5697	67.5272	55.9064	73.0494	52.6417	101.473	49.9551	59.5167	88.5755	58.1686	57.1695	39.5292	53.9746	44.0175	56.9485	50.4998	49.1354	78.842	71.9241	58.1686
	14.1002	51.4111	56.8399	56.8869	57.5856	67.456	56.1199	72.7453	52.6417	101.316	49.5268	59.5579	89.015	58.2047	57.2165	39.7276	54.0588	44.2614	56.9485	50.4181	49.282	77.922	71.9823	58.2047
	14.1335	51.4111	57.1341	56.8869	57.5856	67.0909	56.2873	72.6606	52.2222	100.741	49.7861	59.3414	89.4633	58.2047	57.1498	39.4934	52.9366	44.224	56.6694	50.1713	49.2087	77.6273	71.9823	58.2047
	14.1668	51.3943	57.5018	56.6068	57.5856	66.6183	56.3928	72.6606	52.4838	100.741	49.6987	59.0513	90.0734	58.1075	57.2875	39.6211	52.0294	44.5494	56.6626	49.9979	49.0748	77.2787	72.4796	58.1075
	14.2002	51.2644	57.506	56.5675	57.5739	67.0374	56.4165	72.7823	52.2557	100.441	49.6189	58.5922	90.5791	57.9749	57.4114	39.7696	52.0294	44.5956	56.4461	49.952	49.0433	76.8756	72.3517	57.9749
	14.2335	50.507	57.2238	56.3836	57.6196	66.9583	56.3517	72.6914	52.5301	100.441	49.1319	58.4678	90.9519	57.8278	57.2329	39.6355	52.0356	45.1301	56.0146	50.1508	48.9081	76.2318	72.3517	57.8278
	14.2668	50.9074	56.8906	56.1386	57.6196	66.8002	56.4171	72.7245	52.5174	100.441	48.7126	58.212	91.2387	57.9304	57.17	39.5837	52.0953	44.8211	55.8683	50.1685	48.9498	76.1842	72.13	57.9304
	14.3002	50.9074	56.8828	56.0262	57.6243	66.9174	56.4171	72.5475	52.7002	101.379	48.497	57.9453	91.3692	58.0169	57.0667	39.5837	52.0953	45.5195	55.7963	49.9083	49.04	76.1619	71.5986	58.0169
	14.3335	50.9698	56.8299	56.0262	57.686	66.8199	56.4004	71.9916	52.7002	101.909	48.2491	57.9453	91.533	58.083	57.224	39.437	52.2048	45.73	55.7183	49.8235	48.9075	75.8211	70.6548	58.083
	14.3668	50.4102	56.9038	55.8416	57.7871	66.701	56.3349	72.3922	52.8648	102.206	48.2491	57.7981	91.3715	57.7946	56.5632	39.485	52.3416	45.7817	55.771	49.9209	48.8079	74.6778	70.6461	57.7946
	14.4002	50.8103	57.0961	55.8241	58.2956	66.8465	56.0171	72.2812	53.1519	102.167	48.2491	57.8014	91.3715	57.846	55.8972	39.437	52.541	45.9918	55.6298	49.6782	48.4457	74.2669	70.5894	57.846
	14.4335	50.8451	56.7773	55.8241	59.0144	66.7091	56.0721	72.2812	53.1139	101.421	48.8355	57.5842	91.533	57.9815	55.7584	39.5297	52.8194	46.237	55.549	49.5247	48.3732	74.3613	70.7738	57.9815
	14.4668	50.8451	56.6705	55.8416	60.4079	67.0142	55.5311	72.1916	53.3071	103.95	48.9824	57.5842	91.8255	58.1525	55.9726	39.5297	53.0196	46.3946	55.5761	49.6175	47.8599	74.2985	71.4158	58.1525
	14.5002	51.0063	56.5867	55.9047	61.2946	66.841	55.5311	71.7578	53.3071	104.165	49.1753	57.522	91.533	58.804	56.0611	39.3932	52.8389	46.519	55.3673	49.4701	48.0148	74.1694	71.3694	58.804
	14.5335	50.9714	56.7351	55.35	61.8391	66.7343	55.8723	71.3998	53.5761	106.099	49.6267	57.4304	91.1084	59.1204	56.6125	39.0393	52.8841	46.9363	55.4924	49.4172	47.9698	73.8834	71.4441	59.1204
	14.5668	51.2056	56.7351	55.5669	62.0341	66.965	55.928	71.3897	53.3831	107.008	49.9991	57.6169	90.9732	58.61	57.3154	38.7563	52.7401	46.9561	55.4575	49.5129	48.2248	73.8155	71.7563	58.61
	14.6002	51.5843	56.7607	55.5988	62.4362	66.7971	55.9131	71.4459	53.4323	106.103	50.0973	57.3349	90.6941	58.8903	57.1551	38.806	53.4344	47.1226	55.3923	49.5129	48.1883	73.6433	72.7311	58.8903
	14.6335	51.9184	56.6209	55.1686	62.6422	66.7971	56.1579	71.6298	53.7544	104.771	50.558	57.3349	90.9853	58.9942	57.4065	38.806	52.9924	47.4303	55.3775	49.5129	48.1883	73.064	73.4132	58.9942
	14.6668	52.1457	56.6209	55.1686	63.065	66.972	56.1579	71.47	53.8918	103.705	50.558	57.3931	90.9853	59.1422	58.2581	39.0583	53.3573	47.5744	55.3671	49.4172	48.4656	72.498	73.8859	59.1422
	14.7002	52.9647	56.7374	55.1686	63.7644	67.3081	56.176	70.896	54.0429	104.771	50.6389	57.41	91.1892	59.6212	58.9103	39.1003	52.8096	47.6581	55.2102	49.7063	48.7456	72.212	74.2559	59.6212
	14.7335	53.0757	56.916	55.327	64.0615	67.5782	56.2933	70.5768	53.761	105.125	50.4215	57.3757	91.6383	59.1223	58.9103	39.1986	52.0353	47.8754	55.1287	49.9637	49.0569	72.0982	75.019	59.1223
	14.7668	53.2924	57.0622	55.2281	63.8496	67.6064	56.234	70.6676	54.4601	105.129	50.2456	57.4378	91.8794	58.7999	58.9103	39.1986	51.696	47.6581	55.1503	50.1064	49.0093	72.0982	75.019	58.7999
	14.8002	53.778	57.1692	55.0142	63.8496	67.3075	56.36	70.6676	53.8091	104.524	50.0148	57.3224	91.9531	58.7567	58.9103	39.1986	52.0103	47.6159	55.2991	50.2022	48.9601	72.0982	75.0399	58.7567
	14.8335	53.944	57.2763	54.9778	63.6981	67.4225	56.3148	70.2169	53.8397	104.205	49.8092	57.1007	92.2269	58.6085	58.6543	39.2295	52.5111	47.6297	55.8591	50.0852	48.9032	72.212	74.6514	58.6085
	14.8668	54.1644	57.1441	54.6706	63.8352	67.4594	55.6224	70.025	53.7411	104.205	49.7718	57.0513	92.6098	58.4456	58.2552	39.3071	52.3578	47.4682	55.5856	50.0539	48.8502	72.4905	74.3625	58.4456
	14.9002	53.863	57.0451	54.1403	63.8352	67.2824	54.9395	69.9482	53.761	104.368	49.727	57.0158	92.7379	58.7003	58.0177	39.4541	52.4829	47.2496	55.9389	50.0441	48.8238	73.1765	74.3625	58.7003
	14.9335	53.9916	57.2416	53.8901	63.8726	67.4638	54.9809	70.0892	53.6229	105.75	49.7718	57.05	92.8061	58.7591	57.9777	39.5916	52.6363	47.0304	56.206	49.7869	48.6604	73.706	73.9365	58.7591
	14.9668	53.6669	57.3089	54.2609	64.2094	67.3272	54.8206	70.0892	53.0303	106.623	49.7718	57.0855	92.8578	58.971	57.9196	39.2951	52.9588	47.0098	56.2632	50.0359	48.733	74.6737	73.9365	58.971
	15.0002	53.0828	57.3089	54.1287	64.2404	67.2633	54.6882	70.1015	53.0405	106.762	49.7718	57.0647	92.9162	58.971	57.8901	38.9852	53.3425	46.6885	56.3685	50.1606	48.733	75.5828	73.9365	58.971
	15.0335	52.8607	57.471	54.5261	64.1022	67.044	54.48	70.0549	52.8297	106.762	49.8091	56.8822	93.1395	58.8927	57.1159	38.9391	53.2691	46.6207	56.8021	50.0215	48.5455	75.9283	73.2753	58.8927
	15.0668	52.8607	57.1843	54.9367	64.1114	66.9821	54.2935	69.7207	53.1354	106.36	49.8902	57.0953	93.2208	59.0385	57.3178	38.9391	53.285	46.6793	57.1292	49.937	48.43	76.234	72.9798	59.0385
	15.1002	53.055	57.2141	55.1882	64.3034	66.9821	54.4149	69.7096	53.1354	107.331	49.9892	57.0253	93.2531	59.0674	57.8693	38.8838	53.345	46.6793	57.144	49.8174	48.2317	76.1802	73.2181	59.0674
	15.1335	52.9748	57.7668	55.5389	64.2039	67.2053	54.3823	69.3908	53.1446	109.536	49.6438	57.122	93.4206	58.9141	57.2079	38.8227	53.318	46.7472	57.3964	50.2541	48.2525	76.2498	73.5328	58.9141
	15.1668	53.0185	57.8213	55.487	64.4155	67.068	54.472	69.4788	53.5861	112.312	49.2286	57.655	93.7497	59.0038	57.2079	38.8372	53.3669	46.9755	57.1646	50.0394	48.3009	76.3365	73.0157	59.0038
	15.2002	52.8722	57.8472	55.7105	64.4846	67.2624	54.6711	69.4506	53.7286	111.498	49.2353	57.8718	93.7737	58.9891	57.7955	38.7139	53.0927	47.1423	57.1769	49.862	48.3009	76.5506	73.3914	58.9891
	15.2335	52.9229	57.8127	55.8552	64.5651	67.2199	54.6487	69.5829	53.7242	111.402	49.2353	58.1136	94.0385	59.1548	57.9266	38.8379	53.0927	47.1546	57.1508	49.9174	48.1769	76.3365	74.4012	59.1548
	15.2668	52.9229	57.3534	55.8552	64.5651	67.2262	54.7083	69.436	54.2591	110.546	49.0911	58.1315	94.0793	59.0315	57.9266	39.0481	53.0416	47.1546	57.4879	49.9113	48.106	76.3454	75.8059	59.0315
	15.3002	52.8184	57.3277	55.8552	64.614	67.2417	54.6604	69.5292	54.4124	110.546	48.7372	57.7481	94.028	58.8717	57.8002	39.1917	52.5044	47.0143	57.6221	49.4095	48.0382	76.0689	75.8432	58.8717
	15.3335	53.9447	57.3277	55.7687	65.1051	67.1396	54.6444	69.5241	54.604	110.524	48.5111	57.6413	94.1457	59.0694	57.8002	39.1628	52.5473	47.0143	57.7882	49.2631	47.9789	75.7835	75.7787	59.0694
	15.3668	55.0446	57.3534	55.7687	67.5605	67.1396	54.8627	69.654	54.604	110.524	48.6751	57.9264	93.8415	58.5177	57.7249	39.1355	53.0416	47.1953	57.8215	49.1129	47.9265	75.5026	76.3951	58.5177
	15.4002	55.0446	57.7893	55.6973	70.3407	66.9622	54.9802	69.6603	54.4639	111.222	49.0288	57.7432	94.1624	58.6077	57.3934	39.0071	53.8686	47.0021	57.9828	48.9085	47.8658	75.1032	76.518	58.6077
	15.4335	55.2048	57.8713	55.639	71.9427	66.9622	54.8801	69.5127	54.3324	110.306	48.974	57.4935	94.1624	58.6077	57.1818	38.9304	53.8348	46.8424	58.0825	48.8548	47.6857	74.2926	76.8038	58.6077
	15.4668	55.166	57.4351	55.381	73.3419	66.9622	55.1185	69.6669	54.4997	109.743	48.3789	57.5916	94.1624	59.1206	57.1101	38.6867	54.3651	46.5754	58.3248	48.5878	47.4726	73.7944	76.7167	59.1206
	15.5002	55.166	57.7025	55.4219	74.4292	66.8203	55.1185	69.5127	54.2201	108.355	48.2553	57.5259	93.8753	58.9059	57.0446	38.5288	54.2538	46.6348	58.544	48.3899	47.3484	73.1558	76.9936	58.9059
	15.5335	55.0496	57.7709	55.2523	74.8771	66.3501	55.235	69.506	53.6506	108.977	48.335	57.0899	93.8753	59.0992	56.9286	38.447	54.0945	46.5579	58.544	48.3744	47.3484	71.9703	76.8764	59.0992
	15.5668	54.9206	58.376	54.9083	75.4312	66.872	55.4397	69.1169	53.633	107.783	48.3439	57.3591	93.8753	58.7083	56.4293	38.4257	53.9257	46.4803	58.3283	48.4337	47.3798	70.7482	76.7167	58.7083
	15.6002	54.473	58.4307	54.9974	76.8618	66.9386	55.6245	69.216	53.5344	107.783	48.1457	57.3591	93.8753	58.7471	56.043	38.4679	53.9309	46.2246	58.1082	48.4337	47.3798	69.9442	76.3507	58.7471
	15.6335	54.3976	58.6664	54.9974	77.8952	66.9728	56.0712	69.1839	53.4992	107.783	48.9841	57.3591	94.2094	58.831	55.9703	38.455	53.8189	46.2246	58.3027	48.4998	47.3365	69.7632	76.2803	58.831
	15.6668	54.3976	58.8731	55.0443	78.3069	67.1719	56.2506	69.0091	53.2675	108.474	48.9841	57.7949	94.3121	59.0533	55.874	38.6945	53.5184	46.19	58.5293	48.5149	47.085	69.3546	75.7415	59.0533
	15.7002	53.9174	58.9695	55.0443	78.4738	67.3563	56.255	69.0511	53.6232	109.574	48.979	57.3869	94.4073	59.2168	55.6977	38.8308	53.3666	46.0618	58.8444	48.5149	46.9414	69.0326	74.9673	59.2168
	15.7335	53.6851	58.6715	55.1155	78.4738	67.4136	56.1401	68.931	53.7077	108.765	48.4661	57.1023	94.0334	59.2168	55.7796	38.9056	53.3666	46.0754	58.8493	48.8563	46.9414	68.9629	74.6219	59.2168
	15.7668	53.5022	57.8093	55.0767	78.4738	67.6537	56.1401	69.0025	53.7077	111.344	48.4661	58.2067	93.9129	59.1746	55.763	39.0311	53.4313	45.8167	58.8841	48.6849	47.2734	68.8357	74.8455	59.1746
	15.8002	53.3548	58.0366	55.1914	78.4233	67.2936	56.102	68.9564	53.7722	111.571	48.8933	58.3084	93.9704	58.8456	55.6989	39.1758	53.2174	46.0461	58.7752	48.8839	47.4667	68.6014	74.4199	58.8456
	15.8335	53.3548	58.0105	55.1769	78.0121	67.3148	56.1755	69.1696	53.8075	112.3	48.9907	58.358	94.2224	59.1686	55.7054	39.2547	52.736	46.0461	58.9787	49.0132	47.1752	68.3586	74.4199	59.1686
	15.8668	53.5504	57.983	55.2011	77.1213	67.3633	56.1827	69.2616	54.1356	113.261	48.8121	58.358	94.2224	59.0825	55.7054	39.1099	52.4653	45.5737	58.9977	49.2214	47.0583	68.4141	75.1288	59.0825
	15.9002	53.5504	57.5952	55.1415	76.5723	67.4376	56.2568	69.2616	54.4051	114.691	48.8121	58.1643	93.916	59.0635	56.0058	39.2435	52.3493	46.1077	58.9977	49.1586	46.9458	68.8914	75.6921	59.0635
	15.9335	53.5262	57.5952	55.1415	75.9034	67.4562	56.2045	69.5099	54.8321	115.46	48.9228	57.6377	93.8814	59.0905	56.1821	39.3343	51.9532	46.7438	58.9977	48.9598	46.7229	68.4557	75.5663	59.0905
	15.9668	53.6952	57.2075	55.1415	74.5046	67.4695	56.1179	69.338	54.8407	116.197	48.4713	57.9572	93.7277	59.2507	56.11	39.2763	51.535	46.2709	59.0656	49.2494	46.8914	68.0651	75.2045	59.2507
	16.0002	53.6755	56.3248	55.1004	73.4202	67.5762	56.1076	69.7133	55.0115	115.252	48.1442	57.5735	93.8875	59.2361	56.5512	39.1643	51.5672	46.2739	59.2695	49.8342	47.7721	67.8568	74.9728	59.2361
	16.0335	53.8364	55.8947	54.8241	73.1316	67.5279	56.0528	69.7552	54.8883	115.218	48.1868	57.5243	93.8448	59.2869	57.1889	38.8669	51.7908	46.0651	59.4006	50.0884	48.0251	68.2526	74.5344	59.2869
	16.0668	54.4387	56.0484	54.8725	72.9066	67.6858	56.0436	70.3596	54.3068	115.412	48.6537	57.815	93.7573	59.5685	57.3028	38.8669	50.9502	46.1964	59.6211	49.8138	47.9789	68.3827	75.4352	59.5685
	16.1002	54.7452	56.6568	54.8386	72.6955	67.7332	56.219	70.1128	54.384	115.218	49.0337	57.5029	93.646	59.4439	57.423	38.6759	50.4731	46.207	59.8711	49.2805	47.9823	68.3375	74.6041	59.4439
	16.1335	54.8002	56.1994	54.9339	72.4479	67.7061	56.1847	70.1711	54.1711	114.835	48.7663	57.4717	93.5043	59.5075	57.7122	38.7702	50.9495	46.2264	59.9319	48.9312	48.0138	68.5809	74.6804	59.5075
	16.1668	55.1703	56.1352	55.0557	71.5321	67.7275	55.8812	70.2372	54.3576	114.9	48.8225	57.4684	93.4908	59.3326	57.8876	38.7831	51.584	46.3565	60.0919	48.9497	47.7866	68.5809	74.878	59.3326
	16.2002	55.0667	56.1352	55.2726	71.4997	67.6121	55.8615	70.2069	53.8388	115.141	48.8255	57.133	93.2851	59.4298	57.9341	38.5558	52.0349	46.5701	60.2099	48.8167	47.7445	68.2505	74.4703	59.4298
	16.2335	55.3995	55.9928	55.7154	71.1669	67.6156	55.7985	70.6652	53.9273	114.031	48.7692	57.4182	93.2157	59.4589	57.9659	38.6507	52.2845	46.62	60.245	48.9792	47.7051	68.104	74.772	59.4589
	16.2668	55.6794	55.9373	56.261	71.6857	67.63	55.7536	70.2069	54.0622	113.344	48.5702	58.1225	93.1899	59.4589	57.8599	38.2973	51.7635	46.1066	60.3352	48.9792	47.9028	68.0846	74.8304	59.4589
	16.3002	55.5885	56.1798	56.7335	71.167	67.713	55.7536	70.6307	54.104	113.02	48.5702	58.2314	92.8376	59.2344	58.0243	38.3594	52.0474	46.1219	60.1962	49.0598	47.8117	68.6039	75.1079	59.2344
	16.3335	55.5885	56.4406	57.0231	71.112	67.713	55.8301	70.2822	54.5144	114.643	48.6215	58.3118	92.3691	58.9254	58.1739	38.309	53.1821	46.1448	60.1962	48.966	47.8553	68.4104	75.1079	58.9254
	16.3668	55.8794	56.4406	57.2767	71.463	67.7862	55.9297	70.2822	54.5144	115.485	48.4965	58.4445	91.9852	58.7903	58.3093	38.2616	53.2111	46.1264	59.4133	48.3549	47.6502	68.433	74.9184	58.7903
	16.4002	55.8794	56.7286	57.3521	71.112	68.0272	55.9297	69.8155	54.4209	115.485	48.3258	58.4445	91.9052	58.5458	58.3339	38.1904	53.2627	45.3453	58.8931	48.3549	47.6755	68.454	74.4857	58.5458
	16.4335	55.6583	56.713	57.5331	70.9449	67.9777	55.884	70.0075	54.0471	115.079	48.0469	58.4425	91.8022	58.1645	58.5524	38.3133	53.446	44.9425	58.4815	47.8878	47.7633	68.8216	75.3522	58.1645
	16.4668	55.8079	57.0339	57.9207	70.4176	67.7917	56.133	70.4284	54.5806	114.37	48.0469	58.4793	91.8022	57.7824	58.7332	38.4888	53.6281	45.1792	58.3405	47.7316	47.8785	69.2249	75.3675	57.7824
	16.5002	56.0798	57.4921	58.0114	70.6775	67.8771	56.3925	70.0075	54.4259	113.58	47.9913	58.5323	91.8022	57.9699	58.7816	38.5318	53.6563	45.1792	58.2591	47.7803	47.543	69.7809	75.3675	57.9699
	16.5335	56.2248	57.6511	58.4961	70.2625	67.7962	56.4676	70.0075	54.4788	112.401	48.0849	58.5356	92.0725	57.7618	58.7816	38.5992	53.872	45.8948	58.349	47.6865	47.6382	69.9408	75.3675	57.7618
	16.5668	56.5406	58.0434	59.0199	70.244	67.8771	56.5585	69.7697	54.4788	112.657	48.0849	58.5058	91.9859	57.3186	58.7019	38.5109	52.8874	46.3386	58.1522	47.6865	47.6492	70.5713	74.9163	57.3186
	16.6002	56.1213	58.0434	59.5137	70.244	67.8896	56.5863	69.8222	54.3818	111.83	48.412	58.477	91.8983	57.1673	58.7019	38.4226	52.8076	46.7049	57.4629	47.9099	48.0513	70.6036	73.9545	57.1673
	16.6335	56.1213	58.0798	59.8145	70.2559	67.7798	56.4652	69.2381	54.1474	110.432	48.412	58.4147	92.2317	57.3098	58.8349	38.3752	53.1262	46.7296	57.567	48.244	48.4196	70.4851	74.0272	57.3098
	16.6668	56.1213	57.9999	59.9842	70.4419	67.5507	56.4952	69.2241	54.0959	109.696	48.4516	57.4943	92.2694	57.3644	58.4167	38.4295	53.1262	46.4278	57.6767	48.8798	48.5456	70.684	74.3612	57.3644
	16.7002	56.0426	57.9216	60.472	70.4125	67.7071	56.4909	69.1909	53.9954	108.557	48.7891	56.3781	92.4886	57.4744	58.4167	38.4355	53.2764	45.9393	57.511	48.8798	48.7131	70.8241	74.8555	57.4744
	16.7335	56.0672	57.7646	61.4046	70.4736	67.8755	56.4303	69.2149	54.0141	108.929	48.8111	56.8067	92.4866	57.6723	58.4167	38.5066	53.2481	46.1037	57.5544	48.966	48.8486	71.1364	74.1684	57.6723
	16.7668	56.0984	57.7646	62.1331	70.6076	67.8755	56.4303	68.8004	54.2218	108.718	48.8111	56.1817	92.639	57.9302	58.5396	38.5723	53.2481	46.1698	57.4103	48.8941	49.0373	71.7375	74.1684	57.9302
	16.8002	56.1313	57.6214	62.0042	70.7612	67.914	56.4303	68.8004	54.2675	108.718	48.9738	56.6842	92.8393	58.2754	58.1585	38.5872	53.4262	46.1258	57.3583	48.8277	49.2489	72.3323	74.1684	58.2754
	16.8335	55.8066	57.629	62.5688	70.7633	67.5986	56.28	68.8004	54.3181	109.173	48.9738	56.3665	92.8393	58.4095	57.9178	38.5029	53.6573	46.3204	57.1174	48.8458	49.3397	72.6188	74.0163	58.4095
	16.8668	55.8049	57.3391	62.8546	70.9718	68.0137	56.2979	69.2645	54.1342	108.763	49.0454	56.2711	93.0136	58.6612	58.5726	38.4464	53.5945	46.4432	56.5665	48.9474	49.5186	73.178	74.0309	58.6612
	16.9002	55.7475	57.1362	62.9766	71.0025	67.8411	56.2375	69.2645	54.7026	108.763	48.9247	56.1321	93.0136	59.1321	58.5726	38.643	53.6717	46.5654	56.1425	48.987	49.7359	73.5813	73.33	59.1321
	16.9335	55.8648	57.1128	63.1048	71.2233	67.8862	56.2531	69.3407	54.6019	108.354	48.7971	56.0418	92.991	59.6755	59.3571	38.7456	53.8653	46.5017	56.0914	48.8102	49.7672	74.0573	73.4238	59.6755
	16.9668	55.7796	57.1128	63.1518	71.9929	68.2201	56.3525	69.1911	55.8866	108.072	48.8057	56.0418	92.8242	59.8367	59.5464	38.8161	53.802	46.5839	56.0967	48.5988	49.8967	74.4849	73.3069	59.8367
	17.0002	55.8427	57.1128	63.4982	72.6612	68.239	56.3687	69.1911	56.9686	108.22	48.7626	56.0015	92.7454	60.361	59.7917	38.7793	54.2091	46.8978	56.1616	48.5628	50.0244	75.0568	73.6513	60.361
	17.0335	56.1354	57.1891	63.1518	72.4001	67.9051	56.4938	69.3529	56.9686	109.417	48.73	56.5769	92.4581	61.0075	60.5238	38.8272	54.0202	47.0301	56.2424	48.5714	50.1865	75.2978	73.509	61.0075
	17.0668	56.5173	57.3919	63.2832	72.8971	67.9113	56.6967	69.4674	56.8775	109.715	48.7182	56.9578	92.1625	61.3102	60.7084	38.8319	54.0355	47.458	56.3294	48.4707	50.1849	75.81	74.18	61.3102
	17.1002	56.335	57.9482	63.0648	72.8548	68.0954	56.9112	69.5341	55.9019	109.165	48.73	56.914	92.0759	61.5582	60.7061	38.8827	54.1497	47.9662	56.2287	48.7732	50.4976	76.1148	74.3321	61.5582
	17.1335	56.1548	57.5643	63.5981	72.952	67.9996	56.9508	69.3022	55.4183	108.063	48.5561	56.6393	91.9884	61.9879	60.9425	38.8222	53.8071	48.3542	56.5196	49.0829	50.8751	76.2821	74.49	61.9879
	17.1668	56.5198	57.5657	64.1003	72.952	68.0925	57.1193	69.8821	55.3903	107.946	48.2458	56.8605	91.7117	62.2811	61.443	38.6795	53.8071	48.416	56.6044	49.056	51.0558	77.3358	74.6418	62.2811
	17.2002	56.817	57.5066	63.6847	72.952	68.0815	57.3051	69.3022	56.0417	107.576	47.7787	57.0869	91.5929	62.1302	61.9904	38.7555	53.8071	48.1826	56.7131	49.0337	50.9564	76.3783	74.6908	62.1302
	17.2335	57.1604	57.5845	63.4858	72.8013	68.114	57.217	68.9203	55.3903	106.969	47.7787	57.2089	91.3822	62.4383	62.0757	38.7476	54.1497	48.1887	56.5065	48.6001	50.9697	77.272	75.0222	62.4383
	17.2668	57.6327	57.459	63.0782	72.8224	68.0786	57.1665	68.9738	55.5108	106.822	47.1739	57.4046	91.4055	62.2756	62.1403	38.8382	54.2283	48.1887	56.526	48.4322	51.1742	78.3125	75.2365	62.2756
	17.3002	57.8611	57.459	63.428	72.6055	68.0786	56.9949	69.0738	55.5961	107.32	46.6566	56.8568	91.3822	62.4289	61.9552	38.817	53.198	47.8907	56.2073	48.4684	51.2795	78.3418	75.2365	62.4289
	17.3335	58.25	57.459	63.4785	72.5799	68.0832	57.2173	69.1316	55.8124	106.247	46.4679	57.2803	91.7185	62.521	62.3184	39.0502	52.1228	48.2249	56.3859	48.3324	51.1449	78.6122	75.1872	62.521
	17.3668	58.4026	57.4573	63.3913	72.5045	68.2466	57.1371	69.204	55.9344	106.034	46.4679	57.0916	91.7185	62.5568	62.3665	39.0715	51.8574	48.1979	56.455	48.4627	51.1449	78.9688	74.9598	62.5568
	17.4002	58.4967	57.4573	64.3755	72.3802	68.3397	57.1221	69.4805	55.7658	105.884	46.8707	57.1687	92.0695	62.5023	62.0896	39.0465	51.8691	48.1972	56.2855	48.2583	51.1851	79.1525	74.4752	62.5023
	17.4335	58.772	57.4225	65.2231	72.4355	68.3478	57.0067	69.6532	55.9344	105.748	46.8707	56.7242	92.1459	62.3937	61.5391	39.1036	51.3566	47.7422	56.3298	48.2583	51.0984	79.1762	74.3577	62.3937
	17.4668	59.0224	57.1011	64.6829	72.4077	68.2517	57.0138	69.9083	55.6757	106.222	46.7102	57.4002	91.776	62.2326	61.1504	39.1036	51.3633	47.3432	56.3395	48.1473	51.267	79.3144	74.3639	62.2326
	17.5002	58.6961	56.764	63.9826	72.4133	68.1938	56.4495	69.9083	55.7602	106.235	46.8736	57.0176	92.1755	61.8398	61.1504	39.014	51.0124	47.359	56.3395	48.1744	51.5481	79.3144	74.3523	61.8398
	17.5335	59.0224	56.8971	64.3303	72.359	67.949	56.4495	70.0304	55.2037	106.105	47.3631	56.5843	92.1755	61.7947	61.0806	39.0423	51.0124	48.0136	56.5615	48.2146	52.0478	79.7085	74.4405	61.7947
	17.5668	58.7163	56.8913	65.1182	72.0161	68.1573	56.6877	70.4909	55.3119	105.66	47.4227	56.4691	92.5535	61.7516	61.7573	39.0886	50.9825	48.3615	56.6247	48.0852	52.9164	79.7085	74.4405	61.7516
	17.6002	58.2369	56.8913	65.1182	71.908	68.4565	56.6264	70.9265	55.9693	105.98	47.4825	56.3589	92.8169	61.7715	62.1182	39.1101	51.2476	48.5707	56.7356	47.8191	53.4621	80.4206	74.3333	61.7715
	17.6335	58.3128	56.8899	65.0521	72.4078	68.4565	56.624	70.9265	55.423	105.827	47.6888	56.7282	92.4555	61.3212	62.1182	39.1102	51.6188	48.5946	56.7356	47.5969	54.1185	80.5564	74.4507	61.3212
	17.6668	58.1953	56.9086	65.0521	71.908	68.4466	56.5684	70.9039	55.0007	106.579	48.0845	56.7282	92.0943	61.3212	62.6086	39.0325	51.6188	48.2185	56.6004	47.8541	55.0298	80.779	75.4077	61.3212
	17.7002	57.9711	56.9086	65.4178	72.5163	68.1012	56.4501	70.8148	54.8705	105.78	48.1446	56.9768	92.3106	60.9759	62.0502	38.923	51.4209	48.0466	56.1953	47.376	55.1752	80.7974	75.5463	60.9759
	17.7335	58.7615	57.4891	65.2858	72.6659	68.1175	56.4501	70.8536	55.5177	106.083	48.1446	56.9768	92.2153	61.1465	62.0502	38.8535	51.456	48.0466	56.5222	47.5068	55.8372	81.0901	76.6306	61.1465
	17.7668	58.8674	58.1767	64.9878	73.2755	68.6378	56.5315	71.0296	55.1937	107.193	47.6533	57.4705	92.1712	61.1064	61.9476	38.9211	52.5369	47.9541	56.4779	47.7548	56.2592	80.7079	77.4234	61.1064
	17.8002	58.0499	58.1767	65.4503	73.0057	68.8208	56.5014	71.1718	55.1937	106.671	48.1446	57.3054	92.1274	61.1463	61.9061	39.1846	51.1962	48.0973	56.3905	47.7441	56.3033	80.9567	77.1864	61.1463
	17.8335	57.5917	58.2238	66.0154	73.2671	69.1183	56.6525	71.0389	55.3213	107.136	47.6679	57.5636	92.1102	61.1294	61.6746	39.2993	51.1962	47.967	56.6056	47.65	56.543	81.2054	77.149	61.1294
	17.8668	58.1827	58.1657	66.0773	74.0138	69.0837	56.6525	71.1718	55.3213	107.133	47.8507	57.785	92.1102	61.5341	61.8523	39.2658	51.0348	47.7837	56.568	47.7627	56.543	81.1434	77.1278	61.5341
	17.9002	58.1778	58.0845	65.9094	74.6568	68.7709	56.4982	71.1497	55.3213	107.133	47.7893	57.785	91.8267	61.5341	61.8704	39.0936	51.0348	47.7357	56.4319	48.0256	56.773	80.924	77.1278	61.5341
	17.9335	58.6934	58.0178	65.9509	75.3317	68.7709	56.4693	71.4325	55.3714	107.117	48.2226	58.1018	91.775	61.2653	61.8325	38.9929	50.8228	47.7357	56.286	48.4654	56.9278	80.2764	76.5298	61.2653
	17.9668	58.5039	58.1003	66.1706	75.8661	68.5353	56.5839	71.2787	55.3714	108.435	48.2681	57.9149	91.775	61.4794	61.7818	38.802	51.078	47.5921	56.286	48.3664	57.1232	80.1301	76.5298	61.4794
	18.0002	58.2396	57.9798	66.1981	76.209	68.6152	56.6007	71.3844	55.6682	107.518	48.1905	57.6614	91.8673	60.9652	61.726	38.7641	50.8512	47.5504	56.554	48.2615	57.1721	79.0487	76.1352	60.9652
	18.0335	57.0945	57.56	66.1775	76.4601	68.6733	56.6779	71.5469	55.8061	107.518	48.1905	57.3372	91.818	61.0282	61.8623	39.0157	51.2019	47.5417	56.7177	48.14	57.2062	78.2675	76.9579	61.0282
	18.0668	56.9322	57.0365	66.2407	76.4722	68.7651	56.7508	71.3363	55.5291	106.718	48.7667	57.6705	92.1051	60.6551	61.7223	39.051	51.4294	47.5897	56.5392	48.14	57.1461	77.4492	76.6939	60.6551
	18.1002	57.4242	57.004	66.309	76.6214	68.4992	56.7508	71.6517	55.9252	106.792	49.7867	57.3893	92.0488	60.6551	61.7404	39.1916	51.6659	47.6407	56.4905	48.5094	57.1135	76.8129	75.9447	60.6551
	18.1335	56.8954	57.004	66.4512	76.6379	68.3476	57.2955	71.4301	56.3329	107.208	49.7867	57.3893	92.2477	60.7227	62.3195	38.9794	51.8782	47.6416	56.4691	48.5094	57.4702	76.4501	75.9447	60.7227
	18.1668	56.7906	57.004	66.4512	76.6379	68.383	57.3984	71.4301	56.7944	106.731	50.5706	57.0355	92.2477	60.619	62.7217	38.7332	51.8782	47.535	56.1526	48.5354	57.236	75.9048	76.3967	60.619
	18.2002	55.9864	57.0457	66.7371	76.7041	68.5801	57.896	71.1533	57.167	108.811	50.7238	57.1126	92.3752	60.5857	62.899	39.0543	52.2068	47.681	56.1029	48.6067	57.2567	75.2665	76.7469	60.5857
	18.2335	56.4613	57.7461	66.6539	76.9579	68.4847	57.9024	71.1533	57.186	106.947	50.2924	57.5686	92.2316	60.6152	63.3355	39.2057	52.8694	47.681	56.8429	48.6857	57.4909	74.8995	76.2217	60.6152
	18.2668	56.4372	57.1075	66.5585	77.4433	67.9678	57.572	70.7935	57.5039	106.438	49.788	57.1126	92.2316	60.6905	63.1021	39.3663	53.5181	47.6074	56.8429	48.4723	57.5824	74.6989	76.8923	60.6905
	18.3002	56.8323	57.227	66.5377	77.4451	67.9678	57.9024	71.3274	57.529	106.532	50.3434	57.1126	92.4274	60.5642	63.0204	39.5881	54.6883	47.7141	56.3242	48.5402	57.4908	74.2769	76.566	60.5642
	18.3335	56.8323	57.9246	66.4966	77.4451	67.9678	58.0744	70.9671	57.7557	107.351	50.3434	57.2128	92.3754	60.5243	63.0204	39.5792	55.367	47.6373	56.2028	48.3856	57.4701	74.0925	77.6845	60.5243
	18.3668	56.9992	57.6416	66.7152	78.3215	67.4364	58.2847	70.6006	58.1689	107.974	49.7998	56.4691	92.3132	60.59	63.1879	39.2786	55.367	47.6142	56.7711	47.7791	57.5042	73.3133	76.5138	60.59
	18.4002	56.8323	57.6416	66.5929	78.4196	67.9768	58.4116	70.6006	58.2508	109.404	49.4817	56.3713	92.3132	60.5808	63.0273	38.8395	55.0831	47.492	57.1695	47.8334	57.4457	73.0358	76.2938	60.5808
	18.4335	57.1434	58.4978	66.671	78.9787	68.1404	58.3197	70.4741	58.4622	108.036	49.2982	55.9513	92.3198	60.578	62.8774	38.8886	55.1767	47.3757	57.1579	47.4829	57.2361	73.3191	76.2938	60.578
	18.4668	57.1257	58.3096	66.7914	79.2059	68.1404	58.3277	70.4243	58.5774	107.974	49.0442	56.0798	92.2119	60.5049	62.821	38.6965	55.042	47.3757	57.1822	47.917	56.8924	72.9069	76.9634	60.5049
	18.5002	56.8762	58.4114	66.7281	79.454	68.1404	58.1862	70.5437	58.7067	107.443	49.0442	56.5003	92.3581	60.5821	62.5197	38.9998	54.9487	47.4082	57.1822	47.917	56.7853	72.357	76.0887	60.5821
	18.5335	57.2995	58.5135	66.9317	79.6155	68.1404	58.1783	70.5437	58.0921	107.411	48.425	56.7823	92.3581	60.6782	61.8695	39.0302	54.9857	47.3432	56.9053	47.8804	56.4411	72.2405	75.7391	60.6782
	18.5668	57.76	58.4114	67.0071	80.1002	68.3838	58.2618	70.5437	58.2102	108.217	48.4103	56.3891	92.5966	60.7455	61.4632	39.1818	54.8696	47.4128	56.5992	47.5248	56.1862	71.6631	75.7391	60.7455
	18.6002	57.7313	58.4303	67.0071	80.8502	68.8016	58.1887	70.9426	58.2626	108.294	48.47	56.7823	92.7318	60.9537	61.9169	39.2427	54.7839	47.4128	56.4262	47.8804	55.9615	71.2573	75.7843	60.9537
	18.6335	57.4051	57.8488	66.8743	80.8668	68.4921	58.1112	70.3754	58.4912	107.626	47.8786	56.6777	92.7753	61.2197	62.3165	39.4973	54.6497	47.3747	56.4032	48.0929	55.9457	70.8179	75.959	61.2197
	18.6668	57.8583	57.2637	66.8743	80.8213	68.3863	57.842	70.55	58.5269	106.205	47.7487	57.2224	93.0158	60.7653	62.2926	39.4726	54.5456	47.2402	56.3014	47.9886	55.8682	70.8532	76.165	60.7653
	18.7002	57.9136	57.6876	66.8743	81.106	68.3809	57.8188	70.9621	58.5663	105.855	47.24	57.1962	93.3736	60.4684	62.3019	39.4794	54.0692	47.1657	56.1707	47.9886	55.5336	70.6791	76.3733	60.4684
	18.7335	58.2215	58.342	67.1595	81.1816	68.4501	57.7522	70.9789	59.1493	105.491	47.1227	57.1962	93.4249	60.3536	62.4266	39.5313	53.8982	47.183	56.0789	47.9886	55.8682	70.6791	76.5712	60.3536
	18.7668	58.7499	58.5816	67.367	81.2146	68.5241	57.9396	71.7856	58.7666	105.034	47.2768	57.4819	93.3431	60.4063	62.3529	39.5313	53.8982	47.4092	56.2724	48.1776	55.563	70.6791	76.6589	60.4063
	18.8002	59.0963	58.6874	67.5807	81.2548	68.7796	57.9396	72.0458	59.934	106.226	47.6684	56.9819	93.628	60.8168	62.598	39.7533	54.1409	47.4511	56.2724	48.5151	55.8682	70.5859	76.4609	60.8168
	18.8335	59.0963	58.8152	67.5807	81.47	68.7741	57.9758	71.9732	59.3208	105.993	47.6513	56.8362	93.7465	60.8724	63.0171	39.7758	54.0919	47.605	56.3305	47.9855	56.0844	70.5859	76.7271	60.8724
	18.8668	59.1146	58.694	67.2468	81.3747	68.743	58.3635	72.0388	59.7642	104.351	47.8338	56.2476	93.7465	60.9407	63.2289	39.6038	54.081	47.7767	56.2288	47.6807	56.0744	70.489	76.9844	60.9407
	18.9002	59.1995	59.2475	67.5807	81.4999	68.9757	58.0305	72.4531	60.5436	103.767	47.9228	56.5823	93.7427	60.9587	63.6046	39.7375	54.7855	47.9442	56.6784	48.494	56.9061	70.5024	78.8582	60.9587
	18.9335	60.072	59.3269	67.9445	81.2327	69.1134	58.1127	72.3944	60.7721	103.767	47.99	57.0089	93.684	60.9587	63.9394	39.6736	55.1951	48.3471	57.1897	48.5029	58.2544	70.7229	79.0758	60.9587
	18.9668	60.57	59.4379	68.3215	81.7413	69.0392	58.2912	72.9127	60.8637	104.634	48.0588	57.4199	93.7663	61.0673	64.3949	39.6388	56.1083	48.6813	57.6207	48.9131	58.5593	70.8531	77.2979	61.0673
	19.0002	59.8185	59.5894	68.3884	82.0632	69.4292	58.488	72.9127	60.7088	104.9	48.3921	57.5558	93.7669	61.1388	64.7784	40.0654	56.4388	48.9001	58.1826	49.383	59.7135	70.9629	77.6988	61.1388
	19.0335	60.7949	59.9077	68.8737	82.2186	69.5746	58.6504	73.0224	61.0224	104.326	49.2181	57.7659	93.9055	61.3027	65.2913	40.2959	57.5817	49.0562	58.5165	49.9512	60.5804	71.3035	78.0432	61.3027
	19.0668	61.0443	60.0108	69.1383	82.9513	69.9152	58.9729	73.1734	61.3441	104.445	50.1959	58.3537	94.1336	61.9662	65.8452	40.4161	58.1935	49.6761	58.9633	50.1284	60.6105	71.5987	79.4767	61.9662
	19.1002	61.7417	60.6555	70.0624	83.9034	69.9335	59.8169	73.2352	61.9392	105.13	50.86	59.0906	94.8044	62.9507	66.8584	41.3794	59.3568	50.522	59.7877	50.7181	60.9975	73.5091	81.7537	62.9507
	19.1335	63.0524	61.6435	71.8377	85.8499	69.9655	60.8565	74.6581	63.5995	105.13	52.2403	59.8467	95.4458	64.166	68.9121	42.6196	62.683	52.071	61.8945	52.4145	63.6269	77.3521	85.4061	64.166
	19.1668	66.616	62.8581	77.7175	91.6216	70.6333	66.0819	77.2122	70.5075	108.731	56.0719	62.2692	97.9973	67.9799	78.9867	45.858	74.4967	58.4304	72.0217	61.0927	72.6604	90.1945	93.2766	67.9799
	19.2002	78.1645	66.5733	102.133	109.226	71.9428	82.301	84.5773	91.9671	119.764	69.0774	72.5786	108.698	82.0871	114.855	58.8503	105.658	75.7418	98.6778	87.2486	99.0547	132.156	107.01	82.0871
	19.2335	112.177	79.3454	163.479	151.033	74.7282	120.06	101.977	138.606	147.947	106.432	103.832	135.691	113.184	193.904	88.9173	173.938	113.123	148.577	143.337	155.48	226.46	144.126	113.184
	19.2668	182.808	99.2525	261.952	222.202	79.4124	178.044	132.737	206.447	187.34	180.857	165.244	182.488	159.316	297.102	129.895	266.174	169.515	215.149	220.827	232.821	363.622	209.743	159.316
	19.3002	283.501	122.121	359.769	309.382	86.0906	235.747	165.002	271.079	225.239	282.018	250.007	241.804	204.406	374.385	170.906	329.618	220.114	273.154	291.96	299.965	484.058	283.241	204.406
	19.3335	376.644	147.173	428.103	388.374	94.3828	275.293	189.109	309.976	266.523	369.817	333.377	300.212	240.611	423.815	203.811	361.652	252.07	311.788	341.029	342.419	560.224	332.573	240.611
	19.3668	447.784	171.398	483.633	444.991	102.803	301.697	212.479	336.108	304.546	441.356	400.077	348.392	267.596	465.615	224.965	376.854	277.093	335.761	371.668	370.805	612.489	359.255	267.596
	19.4002	503.637	189.894	532.527	494.016	111.028	319.506	229.548	357.28	325.016	496.468	446.672	386.283	284.861	494.672	239.421	387.224	292.749	347.67	387.672	391.118	659.131	383.626	284.861
	19.4335	541.843	200	563.013	533.298	117.522	326.705	238.946	366.71	332.137	524.331	472.449	419.513	296.096	505.177	246.979	399.418	297.942	355.019	390.963	406.727	683.332	405.263	296.096
	19.4668	576.098	209.057	572.797	553.12	123.669	327.834	247.364	371.173	339.044	549.587	494.559	449.571	302.756	507.703	252.428	406.941	302.149	360.706	395.294	416.446	687.053	422.155	302.756
	19.5002	592.42	219.081	573.741	571.408	130.663	327.834	254.308	377.388	343.3	570.039	512.974	477.069	307.114	507.703	257.777	414.591	304.314	362.998	399.724	425.979	691.48	431.533	307.114
	19.5335	598.877	229.926	574.204	584.514	135.911	327.834	258.725	382.81	344.465	581.116	528.857	496.556	307.777	507.703	261.762	415.834	304.314	364.473	400.944	438.222	692.304	439.714	307.777
	19.5668	598.877	236.136	574.41	589.094	139.819	327.834	262.158	382.81	345.276	589.393	545.415	504.855	308.39	507.703	265.123	418.638	304.314	366.863	401.373	443.823	692.304	443.92	308.39
	19.6002	601.262	240.642	574.239	591.909	143.778	327.071	264.363	382.81	345.978	607.291	561.978	510.16	309.135	506.058	269.432	419.194	304.314	369.942	402.995	451.233	692.964	448.42	309.135
	19.6335	603.377	245.448	573.729	593.392	148.683	324.588	267.626	382.81	346.096	620.192	579.829	517.512	309.135	494.764	272.338	418.243	303.279	370.515	401.225	457.576	689.951	453.829	309.135
	19.6668	603.377	249.892	572.109	593.392	153.472	320.895	270.56	382.353	345.492	622.342	601.776	523.384	309.708	480.998	274.057	419.562	301.396	371.196	394.032	460.233	683.384	456.393	309.708
	19.7002	600.685	253.87	571.362	591.911	157.141	314.389	271.095	380.851	345.18	623.506	617.822	523.57	309.708	465.063	276.51	417.663	299.063	371.196	388.249	462.396	672.08	456.393	309.708
	19.7335	595.335	256.677	567.497	591.911	160.326	308.083	271.948	378.299	345.824	623.506	644.988	525.411	307.827	449.878	277.669	417.022	295.285	370.609	382.616	463.368	671.158	457.112	307.827
	19.7668	583.567	259.386	558.195	590.431	163.322	301.277	272.073	375.739	343.609	623.506	677.676	525.411	303.783	433.23	278.02	412.764	291.815	369.669	375.999	463.555	660.254	457.112	303.783
	19.8002	574.205	261.058	550.317	585.002	165.823	294.497	271.948	372.415	344.489	621.16	698.909	526.096	301.52	417.215	279.387	407.875	288.037	366.216	370.168	464.53	642.481	448.904	301.52
	19.8335	570.886	261.058	541.084	577.473	167.225	286.871	271.948	369.675	344.713	616.992	722.397	526.096	297.674	400.986	280.379	407.468	280.205	361.791	362.646	467.113	628.642	446.694	297.674
	19.8668	556.164	259.601	530.766	569.972	168.986	278.121	271.614	365.982	342.534	613.673	741.326	524.638	292.855	380.547	280.379	405.868	273.758	357.502	355.17	467.113	613.863	444.079	292.855
	19.9002	534.338	260.624	523.965	561.376	168.986	269.752	270.707	361.661	340.378	611.628	752.553	522.49	286.406	366.892	279.387	401.66	267.44	354.163	346.098	466.916	591.482	441.819	286.406
	19.9335	519.507	260.602	514.223	554.228	168.986	260.86	269.491	354.201	333.418	598.907	764.561	520.289	279.846	354.366	279.004	390.665	260.381	349.674	337.001	463.596	570.929	435.161	279.846
	19.9668	505.982	260.202	502.556	547.957	168.891	251.921	267.582	343.854	324.372	585.374	780.947	518.375	274.136	332.091	277.943	381.044	252.721	341.119	328.392	457.714	558.251	422.431	274.136
	20.0002	488.56	259.4	495.244	539.771	168.648	241.25	265.181	336.177	317.312	578.278	791.018	516.926	264.541	311.386	276.177	372.199	243.632	334.418	315.051	447.661	538.005	411.427	264.541
	20.0335	465.891	254.067	481.689	524.65	168.346	231.144	260.628	328.112	307.58	566.895	797.124	510.23	253.787	293.13	272.059	362.712	235.305	325.312	302.951	438.583	510	396.544	253.787
	20.0668	447.315	246.441	465.568	507.814	166.655	220.44	256.402	314.123	297.639	549.001	798.575	500.438	244.14	279.177	267.435	351.887	226.064	315.338	291.21	431.77	490.077	384.334	244.14
	20.1002	431.499	240.095	448.458	494.904	165.212	210.876	251.693	302.056	289.738	534.343	807.063	495.86	235.085	264.011	261.959	339.173	217.793	306.571	279.012	420.795	475.263	377.317	235.085
	20.1335	408.064	233.399	432.866	482.797	163.094	202.17	247.815	292.08	286.213	524.167	810.359	490.181	226.682	247.261	257.55	329.399	209.302	298.426	268.849	413.779	451.22	368.732	226.682
	20.1668	389.679	227.805	416.976	466.413	159.569	194.136	242.281	280.948	278.46	509.481	816.774	483.723	219.287	235.917	254.147	318.501	200.84	290.33	258.075	407.336	428.44	362.084	219.287
	20.2002	372.378	222.018	396.247	447.576	156.059	187.01	236.197	271.927	269.485	487.882	817.919	478.273	211.264	225.259	250.29	306.442	193.898	280.839	247.382	396.196	411.96	352.634	211.264
	20.2335	351.852	217.114	380.287	432.248	154.052	177.847	231.573	263.247	264.604	471.637	819.367	469.695	202.942	214.211	245.391	296.836	186.515	271.741	239.042	385.729	393.289	340.676	202.942
	20.2668	335.79	214.065	366.865	416.445	152.72	170.768	227.524	251.966	257.542	460.594	818.696	460.295	196.603	203.911	240.265	285.645	178.737	263.709	232.237	376.666	375.868	331.401	196.603
	20.3002	323.917	208.326	355.206	401.298	151.281	162.805	224.732	241.709	247.977	447.34	820.892	452.987	190.565	195.499	234.562	273.416	170.827	255.372	223.646	367.545	361.89	320.921	190.565
	20.3335	311.672	202.153	341.562	388.312	148.33	155.199	218.906	234.753	240.39	438.209	818.401	445.961	182.552	188.98	226.958	261.688	163.765	247.494	215.292	359.822	347.121	309.565	182.552
	20.3668	293.913	196.864	324.605	375.524	144.25	150.378	212.635	227.13	235.098	422.837	819.157	435.302	174.668	180.41	221.315	251.56	158.242	238.421	208.328	351.046	332.579	301.367	174.668
	20.4002	277.949	190.002	308.208	362.91	141.562	146.028	208.875	220.709	229.248	405.246	819.319	426.044	169.306	172.36	217.99	242.711	150.741	229.125	201.958	339.246	321.339	295.134	169.306
	20.4335	263.382	184.427	295.613	348.95	140.152	141.289	203.72	214.439	224.824	394.051	819.164	417.227	164.207	167.392	213.728	233.477	143.628	223.127	196.113	330.725	311.299	291.633	164.207
	20.4668	250.719	180.679	282.847	337.247	138.283	136.979	199.462	205.977	218.91	381.086	820.045	408.48	157.513	162.781	208.361	224.257	139.895	216.441	188.625	322.345	299.37	283.489	157.513
	20.5002	241.634	173.25	268.642	325.447	136.238	135.064	195.962	199.779	211.778	369.333	823.929	400.567	152.076	157.649	203.503	212.862	136.486	209.04	182.09	312.716	286.672	273.223	152.076
	20.5335	231.984	167.668	257.312	312.815	133.979	130.637	191.881	194.471	205.787	357.814	822.89	390.841	147.69	151.771	199.602	204.239	133.097	202.364	178.043	305.174	275.353	267.449	147.69
	20.5668	223.336	164.499	246.623	302.66	131.453	124.636	186.861	189.95	200.077	348.706	816.784	380.853	142.392	146.893	195.524	200.22	127.086	195.892	172.655	297.234	264.335	258.901	142.392
	20.6002	216.576	160.644	235.456	292.915	129.061	120.131	181.882	187.284	195.606	342.756	812.101	372.266	138.68	143.529	192.371	193.833	121.017	190.574	167.753	289.96	254.384	251.599	138.68
	20.6335	210.439	156.68	227.469	283.853	126.326	117.049	177.77	180.521	188.664	331.523	801.256	364.453	135.831	139.885	189.009	185.654	117.272	184.079	163.945	281.676	245.827	248.605	135.831
	20.6668	201.77	152.574	219.475	274.258	123.977	114.746	173.261	173.263	181.648	318.704	795.277	357.208	132.522	134.844	182.818	178.844	112.224	177.552	160.719	275.239	238.548	246.067	132.522
	20.7002	192.989	147.89	210.317	265.142	122.286	111.703	169.496	168.396	177.493	312.166	794.762	347.39	127.633	130.743	178.384	173.937	107.917	173.127	158.396	273.138	233.064	244.883	127.633
	20.7335	186.564	142.696	203.2	257.237	121.031	109.139	166.27	164.181	174.636	303.88	784.264	338.844	122.319	127.325	176.553	169.462	105.848	167.987	153.823	269.799	224.686	243.3	122.319
	20.7668	179.951	139.753	195.499	248.527	119.619	106.409	163.329	161.065	170.598	294.6	773.568	331.561	119.094	123.736	174.116	164.016	103.491	163.48	149.858	265.008	216.931	236.756	119.094
	20.8002	175.056	137.045	188.124	241.974	118.443	103.803	160.221	157.712	166.536	288.873	770.049	322.342	116.847	121.861	171.593	158.373	99.6882	158.057	146.148	257.732	212.375	231.414	116.847
	20.8335	171.223	134.856	181.222	235.107	117.223	102.002	157.637	154.385	162.636	283.559	763.854	314.922	114.487	119.952	168.574	152.505	95.9906	153.368	142.085	249.028	206.114	227.423	114.487
	20.8668	165.835	131.849	174.046	225.98	115.352	99.7891	154.967	150.655	158.831	279.265	755.072	307.418	111.04	116.811	166.024	148.398	93.0401	149.636	139.342	242.636	201.29	221.338	111.04
	20.9002	159.932	127.923	168.455	218.371	113.879	97.6536	151.613	145.808	155.469	271.845	743.537	299.539	108.171	114.135	162.634	143.12	90.9138	144.958	136.817	236.405	195.489	215.921	108.171
	20.9335	154.789	124.896	164.207	212.767	112.599	96.2133	149.178	140.953	152.354	264.925	733.033	292.781	106.788	111.802	158.038	136.342	89.5505	141.509	135.29	229.89	189.994	213.307	106.788
	20.9668	149.769	122.59	159.343	206.184	110.887	93.9057	145.937	138.701	151.673	258.092	723.737	286.691	104.547	109.902	154.698	132.901	87.7254	137.997	132.113	223.15	185.299	208.523	104.547
	21.0002	144.858	120.035	154.375	199.876	108.915	91.2619	142.899	135.98	151.605	252.814	713.862	279.499	101.711	108.7	152.878	129.763	85.5338	134.192	128.048	217.632	178.154	205.112	101.711
	21.0335	141.911	117.802	150.07	195.559	107.289	89.5439	141.181	132.187	148.414	247.524	705.285	272.578	99.5801	106.219	150.505	126.762	84.0798	130.677	125.818	215.634	172.876	202.377	99.5801
	21.0668	137.394	115.082	145.326	191.792	106.143	87.4585	139.053	129.068	145.781	241.528	697.404	264.176	97.3595	103.804	146.91	124.535	81.6688	127.114	123.143	212.622	168.68	197.482	97.3595
	21.1002	131.102	112.198	141.029	185.924	104.812	85.7122	136.319	126.275	143.994	237.157	684.141	256.04	95.5642	102.493	144.19	122.459	79.32	124.379	120.285	206.265	163.175	194.353	95.5642
	21.1335	127.193	110.3	136.441	179.316	103.627	84.2353	133.82	124.252	142.489	232.758	669.167	250.888	94.0175	101.41	141.841	119.799	77.5828	121.498	119.179	200.866	159.061	190.455	94.0175
	21.1668	125.444	108.551	132.044	174.387	102.843	83.1388	132.052	122.251	141.243	226.656	658.783	244.82	92.1873	100.574	139.392	116.226	75.7277	118.979	117.691	197.181	157.177	187.483	92.1873
	21.2002	123.581	107.738	129.699	170.145	101.707	82.5578	128.519	119.163	139.98	221.683	653.655	237.295	90.9582	99.3841	136.963	115.326	73.5853	116.616	116.097	193.593	154.392	186.269	90.9582
	21.2335	120.528	106.174	127.246	165.32	100.987	81.1325	125.308	115.324	137.121	217.043	641.923	230.391	89.9569	97.352	134.453	112.493	71.4191	113.462	115.179	189.934	151.804	184.459	89.9569
	21.2668	117.648	103.327	123.941	161.612	99.7531	79.1077	123.942	113.603	134.73	212.758	631.677	224.222	87.5559	95.3189	131.389	110.7	70.6774	110.675	113.26	186.4	147.368	182.733	87.5559
	21.3002	114.808	100.995	121.24	159.343	98.4875	77.986	122.78	112.459	133.309	207.653	628.274	218.892	85.2062	93.8116	128.603	108.754	69.7485	107.889	110.963	182.807	143.386	180.334	85.2062
	21.3335	112.817	98.7777	119.353	156.323	97.9906	77.4527	121.557	110.028	131.718	202.753	616.072	214.105	84.1291	92.444	126.893	106.331	68.527	105.342	109.59	179.754	141.395	177.268	84.1291
	21.3668	110.99	96.8906	117.329	151.952	97.3542	76.4397	120.315	108.392	130.065	201.229	598.705	210.342	82.9276	91.8062	124.514	104.439	67.7134	103.952	108.615	177.645	138.148	175.71	82.9276
	21.4002	107.432	96.1731	114.3	148.429	96.7846	75.6434	118.874	107	128.271	199.252	588.416	205.784	81.9073	90.9266	121.654	103.623	66.7219	102.617	107.508	175.436	135.032	174.339	81.9073
	21.4335	104.178	95.4655	112.202	145.712	95.8444	75.2163	117.029	105.18	126.138	195.976	580.199	199.486	80.7835	90.1219	119.791	101.786	65.4841	100.288	106.17	173.088	132.639	170.903	80.7835
	21.4668	103.409	93.8009	110.747	143.159	94.4797	74.5102	116.109	103.526	124.799	193.757	569.869	195.279	79.7286	89.4687	117.801	99.6549	64.6122	98.3107	104.471	170.356	129.74	168.367	79.7286
	21.5002	101.701	92.8742	109.036	140.082	93.3132	73.407	114.273	100.964	123.584	191.44	563.569	191.69	78.2145	88.5834	115.627	97.2514	63.6247	96.9769	103.454	167.633	127.249	166.548	78.2145
	21.5335	100.024	91.5192	106.989	137.359	92.6508	72.4699	112.883	98.552	123.143	189.304	552.961	188.205	76.1436	87.183	113.409	94.309	62.4858	94.8281	102.039	163.992	125.059	164.259	76.1436
	21.5668	99.3912	90.687	104.094	134.869	91.8722	71.9892	111.452	97.041	121.643	187.188	546.261	185.544	75.2668	86.4233	111.011	92.6079	61.2957	92.3405	99.7658	160.257	122.46	163.164	75.2668
	21.6002	98.4622	88.5678	101.665	131.511	91.1443	71.4646	109.705	95.2009	119.596	183.168	535.508	181.48	74.3754	86.1061	109.477	91.5103	60.1812	90.8413	98.2614	157.56	120.64	160.784	74.3754
	21.6335	96.9724	86.6357	99.7273	128.989	90.7035	70.6092	108.391	93.7302	117.821	179.528	525.172	177.112	72.8616	85.931	107.468	90.2421	59.8948	89.2711	97.5859	155.004	118.884	159.362	72.8616
	21.6668	95.2631	85.6405	98.0563	126.57	90.1866	69.8871	106.854	91.7127	114.918	177.528	513.3	173.113	71.6647	85.0533	104.919	88.5667	58.8371	87.2491	96.5148	153.043	117.555	156.267	71.6647
	21.7002	93.844	84.2472	96.4811	123.946	89.9178	69.4037	105.312	89.4137	112.328	174.186	501.258	169.652	71.0174	83.583	102.646	86.6768	57.4794	85.5485	95.418	150.832	115.568	152.86	71.0174
	21.7335	92.3222	83.8586	94.8985	120.685	89.3118	69.1032	104.299	87.8722	111.188	170.55	487.672	166.785	70.4699	82.2455	100.425	84.9074	56.813	83.9915	94.0881	148.601	112.155	150.918	70.4699
	21.7668	90.5458	81.317	93.9805	117.658	88.469	68.7268	103.397	87.262	110.16	168.012	477.838	163.272	69.767	81.6157	98.1645	83.7646	55.9876	82.7978	92.5588	146.339	109.423	149.339	69.767
	21.8002	89.3605	79.2057	92.5609	115.677	87.9093	67.7488	102.287	86.543	109.994	165.574	465.093	160.412	68.7646	81.3742	96.2684	82.5465	55.1066	81.9188	91.6153	143.081	107.879	147.159	68.7646
	21.8335	88.3462	78.7445	91.2344	113.889	87.0918	66.9976	101.436	85.9334	108.102	162.637	453.67	158.347	68.4211	81.2653	95.1856	81.6544	54.4497	80.4651	90.9299	140.402	105.779	144.561	68.4211
	21.8668	85.9381	77.9685	90.0568	111.346	85.9192	66.673	100.895	84.8635	105.379	158.67	446.394	156.477	68.0062	80.796	93.9572	81.3708	53.6623	78.6713	90.2679	138.225	103.581	143.278	68.0062
	21.9002	83.8961	77.0345	88.6162	109.299	85.4297	66.1007	99.631	83.865	103.532	155.19	437.811	153.607	67.1504	80.0966	92.8596	79.7086	53.1571	77.5758	89.8125	136.141	102.126	142.535	67.1504
	21.9335	82.6174	76.4212	87.0794	108.533	84.9482	65.7706	97.8559	82.7709	103.376	153.477	428.853	149.328	66.2241	78.9098	91.6503	78.049	52.4589	76.9852	89.0749	134.967	100.843	141.855	66.2241
	21.9668	80.3369	76.023	85.568	107.227	84.6317	65.3088	96.5516	81.6497	102.051	152.318	421.072	147.149	65.2171	78.3412	90.4541	77.2529	52.1095	75.796	87.8023	133.565	100.066	139.876	65.2171
	22.0002	78.9405	75.4801	84.6146	105.601	84.0736	64.9689	96.3269	81.0499	100.843	150.377	410.193	146.042	64.3975	78.3295	89.63	75.9663	51.6709	74.6676	86.9479	130.155	98.5249	137.98	64.3975
	22.0335	78.5166	75.0182	83.2001	103.726	83.7465	64.7089	94.4653	80.3235	99.7626	148.044	397.971	143.91	63.9013	77.6657	88.9455	74.9833	51.1723	74.2847	86.1755	127.278	97.1011	137.264	63.9013
	22.0668	77.8507	74.6084	82.1031	102.092	83.5945	64.0094	93.626	79.6002	99.4352	147.44	387.272	141.901	63.66	77.2863	87.716	74.0974	51.0018	73.3721	85.2252	125.742	95.419	136.053	63.66
	22.1002	76.6442	74.1783	82.005	101.329	83.2491	63.2366	93.0819	78.8615	98.6238	145.73	376.385	140.337	62.8983	76.4885	84.7757	73.1737	50.6858	72.1879	83.9505	123.618	93.9735	134.651	62.8983
	22.1335	75.4079	73.5392	80.867	100.649	82.7352	62.9458	92.2341	78.1614	97.7316	143.14	364.929	138.426	61.9421	76.1192	82.4982	72.6958	49.7398	71.2602	83.3288	121.924	92.7121	133.512	61.9421
	22.1668	74.4822	72.4241	79.4602	100.109	82.2798	63.0293	91.3194	77.4216	96.8359	140.228	358.979	136.25	61.4353	75.6401	81.9256	71.8085	49.3939	70.4295	82.5154	120.526	91.0207	133.022	61.4353
	22.2002	73.8011	71.5962	78.7965	99.1882	81.9324	62.8406	90.8725	76.4027	96.6796	138.296	351.373	134.642	61.0759	74.9299	80.6313	70.3934	48.9956	69.3761	81.624	118.742	89.5375	130.192	61.0759
	22.2335	73.4874	71.1231	77.9659	97.8491	81.446	62.5196	90.4941	75.0729	96.2494	137.181	339.951	132.101	60.2685	74.4174	79.3686	69.1197	48.2229	68.4955	80.6411	116.228	88.4117	128.574	60.2685
	22.2668	73.0579	70.6153	76.9908	96.8533	80.7036	62.2766	90.1556	74.6536	95.8375	134.534	330.782	129.926	59.885	73.8449	78.6429	67.9342	47.9449	67.7614	79.9373	113.585	87.3735	126.737	59.885
	22.3002	72.3267	70.5345	75.8393	95.6638	80.602	61.7908	90.0323	73.7566	95.5599	132.421	322.871	129.216	59.6875	73.4526	77.2133	66.7198	47.386	66.6843	79.3505	111.724	86.1642	124.251	59.6875
	22.3335	71.4692	69.9553	74.7301	94.5457	80.1583	61.5158	89.5668	72.9757	94.9232	131.749	316.573	127.69	59.2186	72.5042	75.728	65.2021	46.9186	65.9846	78.5128	110.414	85.5297	122.004	59.2186
	22.3668	70.5096	69.7392	73.9912	93.9215	80.1008	61.2043	88.4226	71.7186	93.651	130.279	308.274	125.864	58.5461	71.5892	74.5678	64.7968	46.7522	65.1452	77.6978	109.472	84.6933	120.258	58.5461
	22.4002	70.0174	69.4165	73.3935	92.9963	79.8615	61.1142	86.7156	70.4342	92.8244	129.059	300.029	124.441	58.3986	71.3008	73.6104	63.5369	46.5911	64.0606	76.6297	107.211	83.519	118.839	58.3986
	22.4335	69.5929	68.8388	73.1308	91.93	79.5562	60.7886	85.7443	68.9696	92.2956	127.984	292.595	122.883	57.8334	70.7072	72.0453	63.1125	46.2083	63.3914	76.0643	104.83	82.9355	116.535	57.8334
	22.4668	69.0589	68.9921	72.5492	91.2548	79.4424	60.3931	85.13	68.7363	92.0104	126.64	284.492	121.312	57.3251	70.1403	70.814	62.5165	46.179	62.9921	75.6889	103.398	82.7385	114.581	57.3251
	22.5002	68.0195	68.1472	71.9019	90.5236	79.1638	59.9997	84.6249	67.5364	91.3462	125.326	278.945	120.348	56.5087	69.7963	69.8169	61.9973	45.9483	62.34	74.861	101.913	82.5986	113.984	56.5087
	22.5335	68.3141	68.0996	71.8119	89.3521	78.8261	59.7181	84.132	66.6578	90.8813	123.395	274.759	119.442	56.5739	69.6512	69.0066	61.5654	45.7081	61.516	73.6255	100.896	82.3026	113.703	56.5739
	22.5668	67.0118	67.7771	71.1918	87.9155	78.6079	59.6301	83.7085	66.5386	90.3328	121.179	266.746	118.331	56.1242	69.3801	68.2544	60.9647	45.7529	60.6334	72.9965	99.8252	82.5736	113.417	56.1242
	22.6002	66.3958	67.4995	70.4427	86.8973	78.5289	59.3929	83.1652	66.4791	89.528	119.629	260.322	117.222	55.8881	68.9934	67.0795	61.2595	45.6022	60.1056	72.6016	98.443	82.3813	113.055	55.8881
	22.6335	66.1534	67.2609	69.8503	86.4396	78.4113	59.1859	82.2574	66.1501	89.4323	117.408	254.04	116.177	55.611	68.3874	66.0906	60.7406	45.4464	59.7877	71.8998	97.5314	82.6391	112.542	55.611
	22.6668	64.9251	67.215	69.1595	85.9547	78.2855	58.9801	81.6997	66.0245	88.7586	115.822	246.529	115.255	55.3187	67.7947	65.3634	60.5453	45.3341	59.52	71.3719	96.7316	82.8315	111.424	55.3187
	22.7002	63.9574	67.1582	68.6753	85.1906	78.0833	58.7597	81.5813	65.5628	88.9778	113.979	243.372	114.138	55.0026	67.0549	64.8276	60.3135	45.3468	59.2009	71.0571	95.727	83.0224	110.181	55.0026
	22.7335	63.5858	67.0551	67.4458	84.8885	77.8571	58.5181	81.301	65.2477	88.5833	112.165	240.131	112.705	54.6818	67.0299	64.1021	59.3751	45.2567	58.855	70.6258	94.9052	83.672	109.971	54.6818
	22.7668	63.4205	66.8753	66.613	84.0969	77.9419	58.5575	80.5653	64.8955	88.3227	111.254	236.305	111.559	54.6471	66.2242	63.3755	58.7938	45.1145	58.2197	70.0593	93.9243	85.2525	108.971	54.6471
	22.8002	63.907	65.7448	65.499	83.6013	77.7877	58.2839	79.9134	63.888	88.3227	109.845	231.684	110.948	54.2906	65.7553	62.5584	58.1007	44.985	57.4924	69.4503	92.6167	84.8095	108.09	54.2906
	22.8335	63.611	64.654	65.1706	83.3259	77.5734	57.8974	79.3227	63.4398	88.1959	107.581	226.941	110.249	53.9415	65.568	61.6167	57.8136	44.999	57.2004	68.968	91.5827	85.1052	106.287	53.9415
	22.8668	62.6642	63.9696	65.0016	83.2447	77.2005	57.6151	78.8328	63.3963	88.5703	105.885	222.276	109.531	53.206	65.0213	61.2783	57.6096	44.9477	56.818	68.5635	90.9729	85.2326	105.165	53.206
	22.9002	62.0449	64.06	64.8754	82.8716	77.0979	57.4282	78.5132	63.0502	87.8322	105.148	217.803	108.963	52.4368	64.6541	61.1751	57.4465	44.3988	56.1915	68.1534	89.91	85.4061	104.511	52.4368
	22.9335	61.4913	63.3602	64.7549	82.6496	76.5261	57.2379	77.8913	62.7789	87.4384	104.122	213.094	108.513	52.158	64.3809	60.6739	56.9574	43.7234	55.1248	67.5781	88.2177	86.4382	103.576	52.158
	22.9668	61.444	63.2347	64.4042	82.4242	76.466	57.2611	77.5787	62.6581	86.7982	102.881	206.943	107.906	52.0278	64.2862	59.8802	56.6341	44.3678	55.0238	67.2671	87.2178	86.1624	102.011	52.0278
	23.0002	61.4717	62.8446	63.8764	82.1377	76.1288	57.3216	77.2632	62.4405	86.7263	102.295	201.495	106.917	52.0426	64.1723	59.106	56.3697	44.6677	54.2575	65.8227	86.2732	85.2824	101.844	52.0426
	23.0335	61.4086	62.3979	63.3798	81.6151	76.0922	57.3187	77.0252	62.0609	86.8483	102.034	197.437	105.755	52.0915	64.2289	58.6681	56.0537	44.1429	53.8603	65.1477	84.9456	84.9625	100.251	52.0915
	23.0668	61.2301	61.859	62.8257	81.0321	75.803	57.4335	76.8098	60.8389	87.319	100.785	193.952	105.072	52.1151	63.4163	58.1671	56.0537	44.0136	53.779	64.7515	84.4024	85.2038	99.693	52.1151
	23.1002	61.0992	61.6833	62.3391	80.8411	75.803	56.8949	76.451	60.9721	86.9733	99.3265	190.406	104.506	52.0804	62.6378	57.3172	56.0537	43.7446	53.3595	64.1961	83.5752	85.2038	98.7494	52.0804
	23.1335	60.774	60.6985	61.818	80.7779	75.5654	56.4747	76.3601	60.206	86.8543	98.6739	187.598	104.293	52.0568	62.9287	56.8433	55.966	43.7608	53.1078	63.747	82.9342	85.9096	99.2782	52.0568
	23.1668	60.7531	60.9607	61.4972	80.7779	75.5338	56.5725	75.8139	59.8439	86.6687	97.9008	184.625	104.133	52.0915	62.397	56.5574	55.7045	43.7608	52.9081	63.6668	82.611	86.5687	98.0962	52.0915
	23.2002	61.0661	60.8253	61.2827	80.6074	75.0259	56.5133	75.6775	59.8439	85.8482	96.8704	180.916	103.885	52.0804	61.9365	56.3686	55.6003	43.7608	52.7307	63.3005	82.2388	86.7846	96.641	52.0804
	23.2335	60.7531	60.3616	61.0087	80.7779	74.9938	56.2798	75.4194	59.9785	85.6148	96.1748	178.063	103.514	52.0568	61.4241	56.0772	55.5786	43.7608	52.6194	63.2316	81.6842	86.997	96.2359	52.0568
	23.2668	61.3607	60.0891	60.6046	80.4673	74.9938	56.2004	74.5584	59.7505	85.6148	95.26	176.202	103.09	51.9899	61.2698	55.5329	55.5786	43.7608	52.5173	63.1239	81.311	87.004	95.283	51.9899
	23.3002	61.6211	59.9959	60.2298	80.5217	74.9938	55.85	74.0183	59.5363	85.766	93.4262	172.85	102.295	51.4842	61.1874	55.0042	55.5337	43.2716	52.1962	63.0086	80.0445	86.6015	95.4317	51.4842
	23.3335	62.1637	59.8892	60.0302	80.846	74.7857	55.6368	73.4298	59.4138	86.0841	91.9036	169.178	101.6	50.8873	61.1286	54.3684	55.3317	43.2716	51.739	62.6892	79.0544	86.7697	95.6609	50.8873
	23.3668	61.9069	59.8207	59.8079	80.7436	75.1308	55.4841	72.5082	59.3202	85.9973	91.6424	166.179	101.45	50.6001	61.1286	53.296	54.7523	43.3756	51.6216	61.9638	78.5741	87.3881	94.8675	50.6001
	23.4002	60.6416	60.5998	59.4123	80.8118	74.8476	55.2662	72.3418	59.2164	85.6918	90.8256	163.155	100.987	50.4693	60.8944	53.052	53.6417	43.3474	51.531	61.316	78.3876	87.3881	94.5655	50.4693
	23.4335	61.4657	60.5998	59.2692	80.0439	74.3775	55.1535	72.8892	58.8409	85.8278	91.0747	160.621	100.897	50.41	60.7662	52.7731	52.6049	43.33	51.3856	61.4355	77.8934	86.698	94.3097	50.41
	23.4668	61.6134	60.5722	58.8547	79.4561	74.1476	54.8948	71.8805	58.5467	85.7317	90.2645	158.535	100.346	50.3559	60.6405	51.7971	52.5433	43.208	51.3183	61.4355	77.8934	86.7893	92.6454	50.3559
	23.5002	61.6134	60.2964	58.7782	78.8692	74.0231	54.867	72.0261	58.4734	85.8447	89.2502	155.797	100.128	50.3058	60.5641	51.5173	52.4224	43.2694	50.9456	61.2266	77.3084	86.5024	92.9624	50.3058
	23.5335	60.8171	59.9622	58.6209	78.4786	74.1518	54.6596	70.9143	58.6467	85.9684	88.2459	154.507	99.8801	50.1756	60.5641	51.4144	52.7859	43.3124	50.7575	60.9708	76.7557	85.8461	92.6695	50.1756
	23.5668	60.8149	59.7969	58.6209	78.0626	73.9505	54.5193	70.5951	58.512	86.1296	88.1222	153.599	99.3169	50.0944	60.3817	51.3366	52.7545	43.1715	50.3841	60.7562	75.7525	86.1228	91.4305	50.0944
	23.6002	60.0925	59.8456	58.6011	77.7259	73.9505	54.6119	70.7662	58.4978	86.0428	87.5682	150.988	99.2741	49.8599	60.8495	51.0967	52.476	42.6593	49.9593	60.3794	74.8676	85.3533	91.1267	49.8599
	23.6335	59.955	59.7802	58.5538	76.9654	73.9724	54.8281	71.2989	58.2693	85.19	87.6261	149.622	98.7736	50.0031	61.0031	51.0967	52.1723	42.9322	50.0127	59.8694	74.4867	85.0506	90.386	50.0031
	23.6668	60.0117	59.7028	58.4934	76.3163	73.9724	54.6635	72.0314	58.1786	84.4447	86.1577	148.233	98.6312	49.9264	60.9859	51.1171	52.3302	42.6875	50.062	59.4325	74.2164	85.2024	89.6948	49.9264
	23.7002	59.6875	59.6314	58.2875	75.8512	73.9724	54.3988	71.8982	58.2972	84.5803	85.1179	146.947	98.2374	49.9559	60.7974	51.0097	52.3019	42.3557	49.7911	59.3674	74.0304	84.9156	89.1151	49.9559
	23.7335	59.679	59.4739	57.9957	75.3059	74.2037	54.4346	71.6128	58.3032	84.757	84.4531	144.999	97.8577	50.1082	60.3764	51.0025	52.4914	42.2549	49.5529	59.4259	73.7696	84.4957	88.7393	50.1082
	23.7668	59.6401	59.3399	57.8926	75.0709	74.3702	54.4974	71.546	58.2801	84.7484	84.0878	143.214	97.6996	50.2264	60.125	51.0113	52.6827	42.1726	49.4736	59.4327	73.5915	83.926	88.8348	50.2264
	23.8002	59.679	59.3567	57.643	74.2027	74.4767	54.5865	71.57	58.4233	84.5832	83.6663	142.028	97.7443	50.0323	60.2832	50.8486	52.7514	42.0459	49.2867	59.2936	73.56	83.0935	88.1919	50.0323
	23.8335	59.679	59.3205	57.5888	73.8576	74.5597	54.0015	71.19	58.5347	84.7508	83.3322	140.514	97.8577	50.2485	60.3127	50.9034	53.181	41.9579	49.5529	59.2936	72.8732	82.9614	87.8472	50.2485
	23.8668	59.5273	59.4699	57.3277	73.4318	74.7272	53.8497	71.0792	58.4146	84.3727	84.1269	137.521	97.8256	50.2864	60.1558	49.42	53.181	42.0367	49.5529	59.2936	72.7988	84.1001	87.5083	50.2864
	23.9002
	23.9335
	23.9668
	24.0002
	24.0335
	24.0668
	24.1002
	24.1335
	24.1668
	24.2002
	24.2335
	24.2668
	24.3002
	24.3335
	24.3668
	24.4002
	24.4335
	24.4668
	24.5002
	24.5335
	24.5668
	24.6002
	24.6335
	24.6668
	24.7002
	24.7335
	24.7668
	24.8002
	24.8335
	24.8668
	24.9002
	24.9335
	24.9668
	25.0002
