# Supplementary material for: Direct modulation of TRPM8 ion channels by rapamycin and analog macrolide immunosuppressants
Source: eLife. 2025 Sep 30;13:RP97341. doi: 10.7554/eLife.97341 (PMC12483518; doi:10.7554/eLife.97341)
Supplement: Figure 1—source data 1. [file elife-97341-fig1-data1.xlsx]

## Sheet: Figure 1B
	0.4 uM Rapamycin	2 uM Rapamycin	10 uM Rapamycin	50 uM Rapamycin
	13.0464	35.1037	1548.1	1640.74
	28.6598	57.9522	131.621	381.34
	7.42944	66.1925	2148.41	2019.8
	24.7088	9.61671	35.9765	365.041
	11.2719	184.659	1825.45	1778.38
	15.3668	144.141	396.349	1200.93
	19.1001	106.918	413.313	892.066
	11.7269	107.208	338.806	545.969
	30.9737	131.626	419.092	624.004
	12.3898	53.1274	2196.55	2662.92
	7.87885	28.5406	1057.94	1147.13
	11.7117	263.927	1461.66	1617.38
	18.5421	223.333	1175.02	1246.34
	10.7361	60.2591	994.098	1357.39
	29.8743	320.179	2993.41	2770
	80.7312	171.5	718.911	820.893
	20.9801	79.471	1513.08	2120.37
	7.20653	172.757	3674.91	3490.91
	57.0434	490.421	2577.52	2271.45
	59.619	227.239	1832.03	1961.5
	13.9677	207.873	2288.71	2059.22
	9.4156	214.793	1934.76	1945.35
	78.6312	102.734	295.954	799.473
	29.2332	323.617	1304.92	1519.27
	45.5005	374.475	3412.77	2821.07
	29.1964	226.378	2534.39	2132.32
	10.1716	162.365	2479.52	2304.37
	54.1386	478.968	2447.04	2334.48
	10.4455	160.601	320.663	856.635
	0.36411	273.69	2083.64	2349.97
	82.9063	693.075	2010.48	2000.5
	32.5273	1044.51	2556.32	2300.69
	46.419	498.468	3366.69	3033.94
	30.8798	647.923	2878.92	2515.2
	28.9606	631.404	2834.48	2667.9
	20.1536	385.843	1004.8	1143.83
	35.8872	1024.58	2611.56	2543.49
	83.0245	461.886	1893.72	1847.48
	36.0867	218.348	4122.63	3808.38
	-0.2846	73.7326	1622.96	1632.95
	19.2115	516.279	2827.83	2659.97
	52.659	319.35	580.547	755.639
	27.9391	116.213	4608.37	4272.78
	19.5822	570.545	2674.45	2998.28
	34.2962	587.686	2769.68	2396.63
	8.909	472.326	2391.55	2490.54
	38.1721	747.905	4876.3	3997.1
	79.2646	734.027	4648.7	4648.13
	79.2646	734.027	4648.7	4648.13
	14.8002	140.683	3821.44	4036.68
	29.7592	890.576	3701.82	3085.06
	144.399	597.964	2668.55	2455.02

## Sheet: Figure 1F
	TRPM8-/-		TRPM8+/+
	Rapa+	Menthol+	Rapa+	Menthol+
	0.05556	0.08333	0.16667	0.21429
	0	0.14286	0.14634	0.17073
	0.01493	0.04478	0.09375	0.10938
	0	0.07407	0.03846	0.19231
	0	0.08284	0.02326	0.02326
			0.11163	0.30698
mean	0.014098	0.085576	0.096685	0.169492
sem	0.0107612	0.0159541	0.0233644	0.0393401
