# Supplementary material for: Direct modulation of TRPM8 ion channels by rapamycin and analog macrolide immunosuppressants
Source: eLife. 2025 Sep 30;13:RP97341. doi: 10.7554/eLife.97341 (PMC12483518; doi:10.7554/eLife.97341)
Supplement: Figure 2—figure supplement 3—source data 1. [file elife-97341-fig2-figsupp3-data1.xlsx]

## Sheet: Fig 2-Fig Suppl 4E - act.tau
Tau of activation
Rapamycin (µM):	0	0	0.3	1	3	10	30
Menthol (µM):	0	50	0	0	0	0	0
cell
1	4.969	13.1105		9.9275	21.2471	31.725
2	6.602	25.6222		9.61462	31.42	41.7818
3	4.38111	25.175					50.8667
4	6.67667	18.7222					68.2786
5	6.33263	20.7906	8.03024	10.5187
6	7.14111	15.4722		14.4778	57.65	68.5947
7	5.555	13.4227					48.91
8	11.775	19.52				29.0333
9	6.844					23.92
10	5.27444	17.5333	5.7725
11	7.538	20.8556
12	4.72167		4.96667	5.66	22.1833	32.2833	39.0667
13	4.9		4.355	4.87333	11.6	27.2667	32.75
14	7.0275					48.2818
15	6.57	36.98	7.036	8.84714	29.25	63.58	52.36
16	5.158					34.98
17	5.13	23.78				35.9

## Sheet: Fig 2-Fig Suppl 4E - deact.tau
Tau of deactivation
Rapamycin (µM):	0	0	0.3	1	3	10	30
Menthol (µM):	0	50	0	0	0	0	0
cell
1	0.7939	5.54105		1.1758	4.29778	11.75
2	1.92556	4.56		1.79455	6.58	11.3167
3	1.812	7.644					21.6364
4	1.235	5.29					15.8357
5	1.44932
6	0.77945	9.43533		1.44967	7.37833	11.3117
7	1.14383	5.80278					27.56
8	0.54333	6.91222				11.64
9	0.3114					7.06
10	1.41444	4.79875	1.65857
11	0.7842	3.27333
12	0.74311		0.72164	1.148	3.01	5.235	9.366
13	0.6502		0.6312	0.7002	1.89	8.042	15.05
14	0.69417					6.27625
15	1.96	4.882	1.714	1.888	3.406	15.34	28.24
16	0.8958					13.72
17	1.296	2.348				13.54
