# Supplementary material for: Direct modulation of TRPM8 ion channels by rapamycin and analog macrolide immunosuppressants
Source: eLife. 2025 Sep 30;13:RP97341. doi: 10.7554/eLife.97341 (PMC12483518; doi:10.7554/eLife.97341)
Supplement: Figure 2—figure supplement 4—source data 1. [file elife-97341-fig2-figsupp4-data1.xlsx]

## Sheet: Fig 2-Fig Suppl 4B
	Control	Rapa	Rapa+menthol
	0.85714	0.66503	0.03666
	0.90495	0.70371	0.08608
	0.88675	0.39218	0.1634
	0.95206	0.77621	0.09724
	0.99422	0.44142	0.15682
	0.93159	0.65864	0.16391
