# Supplementary material for: Direct modulation of TRPM8 ion channels by rapamycin and analog macrolide immunosuppressants
Source: eLife. 2025 Sep 30;13:RP97341. doi: 10.7554/eLife.97341 (PMC12483518; doi:10.7554/eLife.97341)
Supplement: Figure 2—source data 1. [file elife-97341-fig2-data1.xlsx]

## Sheet: Figure 2A I-O patch clamp
Time course					Individual voltage steps
time	I @ +120 mV	I @ -120 mV			time	baseline	Rapamycin
1	31.4631	-10.2721			0	0	0
2	26.2357	-9.78001			0.2	0	0
3	24.0733	-9.38562			0.4	0	0
4	26.1576	-8.4803			0.6	0	0
5	24.3619	-9.08854			0.8	0	0
6	25.8374	-8.18024			1	0	0
7	21.6822	-7.76109			1.2	0	0
8	22.1419	-7.05895			1.4	0	0
9	22.1244	-6.58346			1.6	0	0
10	18.6334	-4.82449			1.8	0	0
11	19.1439	-5.11559			2	0	0
12	19.6987	-3.84149			2.2	0	0
13	16.1714	-4.35198			2.4	0	0
14	16.9896	-3.8082			2.6	0	0
15	17.8932	-3.93582			2.8	0	0
16	17.355	-3.54911			3	0	0
17	20.0487	-3.81972			3.2	0	0
18	15.7911	-3.71088			3.4	0	0
19	15.9759	-3.2563			3.6	0	0
20	16.0591	-3.49234			3.8	0	0
21	17.1659	-3.50515			4	0	0
22	15.7983	-3.28362			4.2	0	0
23	15.1513	-2.7949			4.4	0	0
24	18.9962	-3.29856			4.6	0	0
25	16.1974	-2.7424			4.8	0	0
26	14.1623	-2.84825			5	0	0
27	17.3892	-2.33648			5.2	0	0
28	15.3177	-2.69971			5.4	0	0
29	16.1082	-3.04972			5.6	0	0
30	18.1207	-2.78679			5.8	0	0
31	15.9951	-3.35362			6	0	0
32	16.41	-2.72106			6.2	0	0
33	17.5279	-3.29515			6.4	0	0
34	18.6782	-2.40648			6.6	0	0
35	16.7267	-3.42106			6.8	0	0
36	17.4267	-2.25282			7	0	0
37	16.054	-3.02496			7.2	0	0
38	16.8522	-2.92252			7.4	0	0
39	19.1097	-2.72831			7.6	0	0
40	18.3444	-3.03435			7.8	0	0
41	18.4076	-2.93533			8	0	0
42	22.1927	-2.85167			8.2	0	0
43	24.4169	-2.53923			8.4	0	0
44	25.5472	-2.93447			8.6	0	0
45	20.1648	-2.33392			8.8	0	0
46	18.1203	-2.99039			9	0	0
47	21.6724	-2.59258			9.2	0	0
48	24.8327	-2.40008			9.4	0	0
49	23.5274	-2.46752			9.6	0	0
50	21.5247	-1.87678			9.8	0	0
51	30.1659	-2.57295			10	2.2	3.17
52	29.1706	-2.06544			10.2	1.83	2.99
53	28.7489	-2.58916			10.4	2.01	2.93
54	27.456	-2.65362			10.6	2.14	3.17
55	29.0105	-2.60453			10.8	2.08	3.23
56	21.1218	-2.57508			11	1.83	3.54
57	30.1544	-2.14355			11.2	2.01	3.36
58	21.3164	-2.73215			11.4	2.08	2.62
59	31.2919	-1.85629			11.6	2.38	2.38
60	27.3932	-2.59386			11.8	2.44	3.36
61	29.4856	-1.85245			12	1.65	2.99
62	29.3652	-2.46026			12.2	2.26	2.93
63	28.7476	-2.23319			12.4	2.08	2.5
64	35.7011	-1.94123			12.6	1.95	2.62
65	38.1213	-2.3305			12.8	2.5	3.42
66	37.6108	-1.74702			13	2.44	2.87
67	36.2611	-2.33178			13.2	2.2	3.11
68	28.4556	-2.30489			13.4	2.01	3.42
69	35.865	-2.99337			13.6	2.62	3.6
70	26.0086	-2.67453			13.8	2.75	3.17
71	26.3663	-2.63099			14	2.56	3.17
72	30.3047	-3.04331			14.2	2.32	2.93
73	41.308	-2.83801			14.4	3.11	2.75
74	38.7423	-3.25758			14.6	2.56	3.54
75	42.1843	-2.56185			14.8	2.44	2.01
76	49.8591	-3.02752			15	2.08	2.44
77	57.4952	-2.47264			15.2	2.62	3.05
78	73.0694	-2.383			15.4	2.44	3.3
79	64.0394	-3.00703			15.6	2.69	3.17
80	62.91	-2.56782			15.8	1.95	2.69
81	93.0657	-3.34167			16	2.69	2.81
82	53.6007	-2.55758			16.2	2.81	2.93
83	54.1253	-2.40691			16.4	3.17	2.38
84	74.7426	-3.03819			16.6	3.54	2.62
85	95.0048	-3.55039			16.8	3.11	3.42
86	46.5038	-2.70953			17	3.54	3.3
87	81.5386	-3.09027			17.2	3.3	3.05
88	53.2396	-2.79575			17.4	3.54	3.54
89	100.128	-2.56057			17.6	3.17	3.23
90	95.0163	-3.33057			17.8	2.93	2.81
91	109.337	-2.80301			18	2.69	2.93
92	108.518	-3.01258			18.2	2.75	2.56
93	92.4113	-2.98356			18.4	2.81	2.93
94	104.596	-2.37874			18.6	3.3	3.11
95	139.907	-3.01258			18.8	2.81	2.44
96	97.786	-3.03819			19	2.93	2.69
97	100.362	-2.78892			19.2	2.32	2.56
98	96.1969	-4.16631			19.4	2.99	3.17
99	79.1804	-3.87052			19.6	2.75	2.44
100	108.911	-4.19107			19.8	3.23	2.5
101	82.0248	-3.85387			20	3.17	2.69
102	70.7026	-4.75619			20.2	2.99	2.62
103	60.0545	-4.26576			20.4	3.17	2.14
104	82.5571	-4.11082			20.6	2.69	2.69
105	82.1575	-4.21668			20.8	3.54	2.5
106	78.0087	-4.47534			21	3.05	2.14
107	49.9658	-4.10826			21.2	3.3	2.56
108	48.55	-4.09588			21.4	2.99	2.99
109	50.0973	-4.47278			21.6	2.93	2.44
110	45.5358	-3.81887			21.8	2.87	2.2
111	41.3481	-4.101			22	3.3	2.87
112	49.4908	-4.29308			22.2	2.93	2.75
113	56.2386	-3.94777			22.4	2.75	3.05
114	43.3226	-4.69985			22.6	2.69	2.56
115	50.9096	-3.40484			22.8	2.32	2.5
116	53.2303	-4.14198			23	2.38	2.69
117	47.5781	-4.27473			23.2	2.26	2.62
118	55.9675	-3.70747			23.4	2.38	2.93
119	42.9265	-3.62978			23.6	2.5	2.5
120	61.9201	-2.97929			23.8	2.26	2.5
121	61.679	-3.8385			24	2.38	2.5
122	50.9902	-2.65746			24.2	2.99	2.2
123	48.2158	-3.19057			24.4	2.38	2.81
124	42.7447	-3.50088			24.6	2.5	2.62
125	45.4158	-3.23752			24.8	2.32	2.69
126	46.6003	-4.15777			25	2.69	2.69
127	50.1319	-2.96094			25.2	2.32	1.95
128	51.8217	-4.24655			25.4	2.38	2.56
129	64.4372	-3.68271			25.6	2.26	2.75
130	51.8836	-3.84149			25.8	2.08	2.56
131	58.7778	-3.5982			26	2.01	2.56
132	48.0353	-3.29258			26.2	2.26	2.75
133	55.685	-3.77021			26.4	1.95	2.69
134	54.11	-2.8299			26.6	2.2	3.05
135	66.5286	-2.98527			26.8	2.26	2.44
136	66.4382	-2.87984			27	2.14	2.93
137	61.8668	-2.83886			27.2	1.65	3.05
138	76.1686	-3.50856			27.4	2.01	3.17
139	59.4441	-2.49313			27.6	1.83	3.05
140	57.0935	-2.72917			27.8	2.32	3.05
141	67.0647	-2.51105			28	2.08	2.93
142	62.2364	-4.24527			28.2	1.28	3.17
143	57.6446	-2.7885			28.4	1.65	2.69
144	59.4471	-3.05484			28.6	1.77	2.99
145	55.2722	-2.69545			28.8	2.01	2.93
146	52.8764	-2.55502			29	1.71	2.44
147	55.8489	-2.75051			29.2	1.77	2.2
148	44.6932	-3.27679			29.4	2.44	2.81
149	47.7152	-2.50977			29.6	2.08	3.17
150	60.9901	-2.3813			29.8	2.26	3.42
151	57.318	-3.12569			30	2.32	3.11
152	113.377	-2.27075			30.2	-164	-140
153	138.491	-2.86447			30.4	-139	-135
154	135.209	-2.29849			30.6	-72.8	-73.5
155	110.544	-2.66984			30.8	-48.6	-49.5
156	103.208	-2.50423			31	-37.5	-37.4
157	108.3	-3.02496			31.2	-30.7	-30.6
158	91.8257	-2.45258			31.4	-25.8	-26.6
159	98.5206	-2.16191			31.6	-22.6	-23.7
160	89.3962	-2.50337			31.8	-20.6	-21.6
161	83.1277	-2.14313			32	-18.9	-19.8
162	100.018	-2.56014			32.2	-17.6	-18.2
163	92.7997	-2.15294			32.4	-16.6	-17.8
164	86.679	-2.70953			32.6	-16.1	-16.4
165	86.0844	-2.48587			32.8	-14.6	-15.7
166	89.3309	-3.6682			33	-14.2	-15.3
167	85.3268	-2.52642			33.2	-14.2	-14.5
168	53.1884	-1.85117			33.4	-13.4	-13.9
169	52.5627	-1.60702			33.6	-12.9	-14.2
170	51.8085	-2.12392			33.8	-12.6	-13.8
171	47.0907	-2.43679			34	-12.1	-12.9
172	49.9091	-1.81148			34.2	-12.3	-13.3
173	50.8349	-1.98733			34.4	-10.9	-12.9
174	50.8097	-2.11538			34.6	-11.4	-12.3
175	56.3346	-1.94209			34.8	-11.6	-12.9
176	48.3264	-2.03215			35	-11.5	-12.7
177	60.5078	-1.92459			35.2	-10.6	-12.6
178	53.891	-2.59685			35.4	-10.6	-11.8
179	52.7646	-2.17898			35.6	-10.7	-12.1
180	60.6354	-2.35782			35.8	-11	-11.9
181	55.3192	-2.38557			36	-9.89	-10.9
182	64.9229	-3.50899			36.2	-9.52	-11.5
183	61.6508	-4.58546			36.4	-9.52	-11.4
184	74.25	-3.82655			36.6	-9.09	-10.7
185	61.3029	-4.50479			36.8	-9.03	-10.6
186	52.8073	-4.2218			37	-9.16	-10.6
187	63.6565	-4.47064			37.2	-8.97	-10.9
188	57.3897	-3.36472			37.4	-8.61	-10.3
189	74.6171	-3.78131			37.6	-8.79	-10.4
190	59.0523	-3.91064			37.8	-8.79	-10.3
191	62.0286	-3.14063			38	-9.46	-9.52
192	54.4096	-4.38485			38.2	-8.97	-10.4
193	70.4252	-3.2499			38.4	-9.09	-9.4
194	54.8676	-4.43223			38.6	-8.18	-9.4
195	58.8307	-3.70192			38.8	-8.55	-9.58
196	50.9561	-4.45698			39	-8.55	-9.58
197	69.9779	-3.77405			39.2	-8.91	-9.77
198	63.5605	-4.45442			39.4	-8.42	-9.46
199	58.2063	-3.80393			39.6	-8.42	-9.28
200	65.4334	-3.26057			39.8	-8.12	-9.4
201	66.6849	-3.77448			40	-7.75	-9.16
202	59.5768	-2.88368			40.2	-8.06	-8.79
203	70.5084	-3.57643			40.4	-7.69	-9.77
204	83.4005	-2.64423			40.6	-8.48	-9.03
205	67.2828	-3.37326			40.8	-8.06	-10.9
206	72.809	-3.37838			41	-7.63	-11.2
207	79.5965	-3.20124			41.2	-7.39	-10.5
208	67.8416	-3.36771			41.4	-8.06	-10.1
209	77.3864	-3.07447			41.6	-7.87	-9.83
210	76.6954	-4.15265			41.8	-7.87	-9.64
211	71.4739	-3.54271			42	-7.39	-9.03
212	62.5813	-3.52862			42.2	-7.45	-8.85
213	77.6873	-4.20857			42.4	-7.45	-8.97
214	74.145	-3.06252			42.6	-8.12	-8.73
215	70.2873	-3.21746			42.8	-8.18	-8.48
216	64.8862	-3.13722			43	-7.93	-8.67
217	82.2758	-3.60716			43.2	-8.24	-8.67
218	69.6168	-3.4296			43.4	-7.87	-8.48
219	71.1547	-2.35996			43.6	-7.87	-8.3
220	76.1844	-3.22429			43.8	-8.48	-8.55
221	71.1491	-2.98484			44	-7.69	-8.61
222	67.1706	-3.5299			44.2	-7.75	-9.09
223	75.0141	-3.33399			44.4	-8.06	-8.73
224	71.4906	-3.25545			44.6	-7.87	-8.67
225	63.7555	-3.36173			44.8	-8.06	-8.18
226	86.0041	-3.01002			45	-7.93	-8.24
227	64.9225	-3.49106			45.2	-7.93	-8.79
228	69.3581	-2.90246			45.4	-7.81	-8.06
229	70.8653	-2.49142			45.6	-8.18	-8.48
230	65.6784	-3.61015			45.8	-8.18	-8.42
231	63.2817	-3.32033			46	-8.24	-8.06
232	73.1719	-3.99302			46.2	-8.3	-7.93
233	74.2415	-3.14874			46.4	-8.36	-8.12
234	69.1592	-2.87642			46.6	-8.18	-7.57
235	67.606	-3.35789			46.8	-8.48	-9.03
236	74.364	-3.11801			47	-7.63	-7.93
237	77.4082	-3.79795			47.2	-8.12	-7.81
238	60.7694	-2.79959			47.4	-8.48	-7.45
239	64.4389	-1.33428			47.6	-8.24	-7.93
240	57.009	-1.04915			47.8	-7.93	-7.87
241	69.6151	-1.09056			48	-7.81	-7.87
242	66.7626	-1.52763			48.2	-8.42	-7.32
243	62.7981	-0.96379			48.4	-8.36	-7.57
244	66.862	-1.39361			48.6	-8.3	-7.32
245	40.488	-3.17862			48.8	-8.18	-8
246	42.18	-2.18367			49	-8	-8.36
247	43.5544	-2.4163			49.2	-8	-9.16
248	43.4793	-2.13245			49.4	-7.69	-7.69
249	40.2345	-1.67532			49.6	-7.57	-7.39
250	68.5663	-1.73891			49.8	-8	-7.69
251	75.0418	-1.543			50	-7.75	-7.75
252	61.3115	-1.84392			50.2	-8	-7.51
253	63.4017	-2.31386			50.4	-8.48	-7.75
254	75.5493	-2.63356			50.6	-7.75	-7.87
255	65.4261	-2.00355			50.8	-7.57	-6.9
256	43.7191	-2.56526			51	-8.3	-6.96
257	51.9233	-1.93568			51.2	-8.24	-7.32
258	60.1048	-2.08337			51.4	-7.45	-7.93
259	55.7661	-1.90196			51.6	-7.51	-7.93
260	43.8946	-1.92757			51.8	-7.39	-7.51
261	45.7735	-2.22721			52	-7.81	-7.45
262	51.8772	-2.7313			52.2	-7.75	-8.3
263	36.5522	-2.21441			52.4	-7.51	-7.93
264	38.1537	-1.73038			52.6	-7.81	-7.87
265	31.6731	-1.70818			52.8	-6.96	-7.69
266	35.025	-1.60446			53	-7.02	-7.63
267	40.4091	-1.58269			53.2	-7.51	-7.14
268	42.0221	-2.71337			53.4	-7.63	-7.45
269	44.5916	-2.5341			53.6	-7.08	-7.45
270	38.3957	-2.89051			53.8	-6.9	-7.2
271	41.0621	-1.73294			54	-7.02	-7.39
272	41.8526	-3.33868			54.2	-7.75	-7.26
273	47.9435	-2.52301			54.4	-6.53	-7.39
274	36.848	-3.05825			54.6	-7.51	-7.08
275	41.7007	-2.16105			54.8	-7.08	-8.42
276	38.292	-3.3199			55	-7.45	-8.3
277	44.8763	-3.91234			55.2	-6.78	-7.69
278	40.2349	-3.24905			55.4	-6.96	-7.26
279	38.4734	-3.4232			55.6	-6.9	-7.51
280	41.9077	-2.43636			55.8	-7.57	-7.75
281	38.175	-3.62509			56	-6.71	-7.45
282	31.7755	-2.92764			56.2	-6.65	-7.45
283	48.6158	-3.18502			56.4	-6.29	-7.93
284	40.5875	-5.15101			56.6	-6.23	-7.57
285	37.7823	-4.99949			56.8	-6.35	-7.57
286	44.7534	-4.60083			57	-6.1	-7.08
287	43.5634	-5.56291			57.2	-6.35	-7.2
288	36.8331	-3.40655			57.4	-5.62	-7.26
289	32.8332	-4.81296			57.6	-6.23	-7.57
290	41.2627	-5.08443			57.8	-6.47	-7.45
291	41.608	-4.47576			58	-6.9	-7.08
292	44.1221	-4.6832			58.2	-6.96	-7.45
293	36.2137	-3.95119			58.4	-6.78	-7.26
294	35.9103	-3.34978			58.6	-6.1	-7.45
295	42.1057	-4.56028			58.8	-6.59	-7.14
296	38.2309	-4.35028			59	-6.84	-7.51
297	32.7581	-5.96327			59.2	-7.02	-7.08
298	36.3315	-4.92052			59.4	-6.71	-7.51
299	35.9115	-4.83942			59.6	-6.35	-7.26
300	32.5041	-3.23496			59.8	-6.59	-7.75
301	37.7934	-5.09083			60	-6.59	-7.2
					60.2	-6.47	-7.14
					60.4	-6.29	-8.48
					60.6	-6.41	-7.14
					60.8	-6.23	-7.87
					61	-6.16	-7.69
					61.2	-6.16	-6.9
					61.4	-6.41	-7.45
					61.6	-6.41	-6.96
					61.8	-6.29	-7.57
					62	-6.23	-7.08
					62.2	-6.41	-6.84
					62.4	-6.59	-7.45
					62.6	-6.78	-7.2
					62.8	-6.78	-7.2
					63	-6.96	-7.2
					63.2	-6.84	-6.59
					63.4	-6.78	-7.14
					63.6	-6.78	-6.84
					63.8	-7.26	-6.78
					64	-6.53	-7.57
					64.2	-6.47	-7.75
					64.4	-6.78	-7.45
					64.6	-6.71	-7.26
					64.8	-7.2	-7.02
					65	-6.9	-7.51
					65.2	-6.78	-7.69
					65.4	-6.59	-7.32
					65.6	-6.84	-7.2
					65.8	-7.45	-8.18
					66	-7.02	-7.39
					66.2	-7.08	-7.39
					66.4	-7.02	-7.2
					66.6	-7.26	-7.26
					66.8	-7.08	-7.45
					67	-7.2	-6.71
					67.2	-7.02	-6.23
					67.4	-7.32	-6.65
					67.6	-7.32	-6.84
					67.8	-7.02	-6.78
					68	-7.51	-6.47
					68.2	-7.81	-6.47
					68.4	-7.32	-6.29
					68.6	-7.51	-6.96
					68.8	-7.63	-7.26
					69	-7.2	-7.39
					69.2	-7.14	-7.63
					69.4	-7.08	-6.96
					69.6	-7.26	-6.53
					69.8	-7.26	-6.23
					70	-7.08	-6.59
					70.2	-7.57	-7.08
					70.4	-7.39	-6.9
					70.6	-6.84	-7.2
					70.8	-7.02	-6.1
					71	-7.02	-5.62
					71.2	-7.26	-5.92
					71.4	-6.47	-6.9
					71.6	-6.96	-7.32
					71.8	-6.96	-6.71
					72	-7.32	-7.14
					72.2	-6.65	-7.14
					72.4	-6.84	-7.75
					72.6	-7.08	-7.08
					72.8	-6.59	-6.23
					73	-6.78	-6.35
					73.2	-6.84	-5.98
					73.4	-6.9	-6.59
					73.6	-6.35	-6.96
					73.8	-6.65	-6.47
					74	-6.41	-6.53
					74.2	-6.9	-6.41
					74.4	-5.68	-6.23
					74.6	-6.65	-6.04
					74.8	-6.78	-7.2
					75	-6.78	-7.08
					75.2	-6.35	-6.41
					75.4	-6.78	-6.59
					75.6	-6.71	-6.53
					75.8	-6.84	-7.02
					76	-6.35	-6.71
					76.2	-5.98	-6.84
					76.4	-6.04	-6.9
					76.6	-5.86	-6.16
					76.8	-5.98	-6.29
					77	-5.62	-6.65
					77.2	-5.49	-6.35
					77.4	-5.74	-6.04
					77.6	-5.92	-6.16
					77.8	-5.8	-6.35
					78	-6.29	-6.1
					78.2	-6.23	-6.59
					78.4	-6.35	-6.53
					78.6	-5.86	-6.53
					78.8	-6.16	-6.53
					79	-5.92	-6.78
					79.2	-6.84	-7.14
					79.4	-6.16	-6.71
					79.6	-6.29	-6.9
					79.8	-6.23	-6.71
					80	-5.86	-6.71
					80.2	-5.68	-6.35
					80.4	-5.98	-7.2
					80.6	-6.35	-6.71
					80.8	-5.74	-6.9
					81	-5.74	-7.14
					81.2	-5.68	-6.59
					81.4	-5.86	-6.78
					81.6	-6.1	-6.53
					81.8	-6.04	-6.65
					82	-5.86	-6.78
					82.2	-6.1	-6.47
					82.4	-5.92	-6.47
					82.6	-6.47	-6.53
					82.8	-6.47	-6.96
					83	-6.47	-6.29
					83.2	-6.35	-6.71
					83.4	-6.71	-6.41
					83.6	-6.59	-6.41
					83.8	-6.47	-6.41
					84	-6.29	-7.02
					84.2	-6.29	-7.08
					84.4	-6.47	-6.96
					84.6	-6.29	-6.96
					84.8	-6.9	-6.84
					85	-6.35	-6.84
					85.2	-6.78	-7.26
					85.4	-6.23	-6.29
					85.6	-6.65	-6.84
					85.8	-6.41	-6.59
					86	-6.65	-6.23
					86.2	-6.84	-6.71
					86.4	-6.84	-5.98
					86.6	-6.71	-6.47
					86.8	-6.59	-6.84
					87	-6.71	-6.59
					87.2	-6.9	-5.98
					87.4	-7.14	-6.53
					87.6	-6.96	-6.47
					87.8	-6.78	-6.23
					88	-7.08	-6.59
					88.2	-7.51	-5.8
					88.4	-7.32	-6.23
					88.6	-7.2	-5.8
					88.8	-6.84	-6.9
					89	-6.78	-6.23
					89.2	-7.08	-7.02
					89.4	-7.08	-6.35
					89.6	-6.65	-5.68
					89.8	-6.84	-5.92
					90	-6.65	-6.47
					90.2	-6.84	-5.92
					90.4	-7.02	-6.47
					90.6	-6.35	-6.35
					90.8	-6.59	-5.68
					91	-6.84	-5.55
					91.2	-6.96	-5.55
					91.4	-6.71	-6.23
					91.6	-6.47	-7.14
					91.8	-6.78	-5.8
					92	-7.14	-5.92
					92.2	-6.84	-5.86
					92.4	-6.65	-6.29
					92.6	-7.2	-6.53
					92.8	-6.04	-6.29
					93	-6.16	-6.16
					93.2	-6.71	-5.68
					93.4	-6.59	-6.1
					93.6	-6.1	-5.62
					93.8	-6.16	-6.23
					94	-6.23	-5.98
					94.2	-6.16	-5.8
					94.4	-5.37	-6.41
					94.6	-6.41	-6.04
					94.8	-6.59	-6.71
					95	-6.78	-7.57
					95.2	-5.74	-6.65
					95.4	-6.16	-6.23
					95.6	-6.41	-6.04
					95.8	-6.65	-6.9
					96	-5.8	-6.84
					96.2	-5.92	-6.35
					96.4	-5.49	-6.04
					96.6	-5.8	-6.23
					96.8	-5.55	-6.16
					97	-5.68	-6.47
					97.2	-5.49	-6.04
					97.4	-5.25	-5.62
					97.6	-5.31	-5.8
					97.8	-5.8	-6.41
					98	-5.8	-6.1
					98.2	-5.74	-6.78
					98.4	-6.23	-6.04
					98.6	-5.31	-6.41
					98.8	-6.04	-6.29
					99	-5.8	-6.78
					99.2	-6.23	-6.53
					99.4	-5.8	-6.78
					99.6	-5.8	-6.71
					99.8	-5.55	-6.47
					100	-5.37	-6.78
					100.2	-5.31	-6.29
					100.4	-5.62	-6.71
					100.6	-5.92	-6.47
					100.8	-5.37	-6.59
					101	-5.62	-7.14
					101.2	-5.37	-6.59
					101.4	-6.1	-6.78
					101.6	-5.55	-6.35
					101.8	-5.8	-6.9
					102	-5.25	-6.16
					102.2	-5.8	-6.1
					102.4	-5.86	-6.41
					102.6	-6.29	-6.78
					102.8	-6.47	-6.47
					103	-6.35	-5.98
					103.2	-6.23	-6.47
					103.4	-6.53	-6.35
					103.6	-6.35	-6.47
					103.8	-6.53	-6.16
					104	-6.1	-6.53
					104.2	-5.98	-6.84
					104.4	-6.23	-6.71
					104.6	-6.23	-6.84
					104.8	-6.04	-6.23
					105	-6.47	-6.53
					105.2	-6.29	-7.14
					105.4	-6.29	-6.1
					105.6	-6.41	-6.53
					105.8	-6.35	-6.41
					106	-6.47	-6.65
					106.2	-6.53	-6.71
					106.4	-6.53	-5.98
					106.6	-6.53	-6.1
					106.8	-6.41	-7.08
					107	-6.53	-6.1
					107.2	-6.65	-6.1
					107.4	-6.96	-6.1
					107.6	-6.47	-6.23
					107.8	-6.59	-6.23
					108	-6.35	-5.86
					108.2	-6.9	-5.74
					108.4	-7.02	-6.04
					108.6	-7.08	-5.86
					108.8	-6.71	-6.65
					109	-6.9	-6.96
					109.2	-6.78	-6.65
					109.4	-6.84	-5.98
					109.6	-6.35	-5.74
					109.8	-6.53	-5.49
					110	-6.71	-6.1
					110.2	-6.41	-5.74
					110.4	-7.02	-6.59
					110.6	-6.35	-6.1
					110.8	-6.41	-5.49
					111	-6.65	-5.25
					111.2	-7.08	-5.8
					111.4	-6.41	-6.65
					111.6	-6.53	-6.71
					111.8	-6.71	-5.86
					112	-7.02	-6.04
					112.2	-6.53	-5.8
					112.4	-6.53	-6.35
					112.6	-6.84	-6.35
					112.8	-6.29	-5.74
					113	-5.92	-5.68
					113.2	-6.29	-5.37
					113.4	-6.29	-5.62
					113.6	-6.16	-5.43
					113.8	-5.98	-5.98
					114	-6.04	-5.74
					114.2	-6.29	-6.1
					114.4	-5.49	-6.29
					114.6	-5.92	-5.62
					114.8	-6.41	-7.2
					115	-6.47	-6.53
					115.2	-6.1	-6.04
					115.4	-5.86	-5.98
					115.6	-6.53	-6.23
					115.8	-6.41	-6.41
					116	-6.1	-6.59
					116.2	-5.86	-6.04
					116.4	-5.49	-6.41
					116.6	-5.43	-6.23
					116.8	-5.68	-5.98
					117	-5.31	-5.98
					117.2	-5.37	-6.35
					117.4	-5.19	-5.98
					117.6	-5.37	-6.35
					117.8	-5.31	-6.1
					118	-6.04	-5.92
					118.2	-5.86	-6.35
					118.4	-5.98	-6.1
					118.6	-5.49	-5.98
					118.8	-5.92	-6.29
					119	-5.92	-5.98
					119.2	-6.35	-6.84
					119.4	-5.68	-6.16
					119.6	-5.86	-6.35
					119.8	-5.49	-6.41
					120	-5.49	-6.29
					120.2	-5.49	-6.35
					120.4	-5.55	-6.47
					120.6	-5.8	-6.29
					120.8	-5.37	-6.65
					121	-5.43	-7.26
					121.2	-5.62	-6.65
					121.4	-6.04	-6.71
					121.6	-5.74	-6.04
					121.8	-5.68	-6.65
					122	-5.43	-7.08
					122.2	-5.68	-6.35
					122.4	-5.74	-6.23
					122.6	-5.98	-6.59
					122.8	-6.1	-6.47
					123	-6.29	-5.98
					123.2	-6.23	-6.16
					123.4	-6.16	-6.29
					123.6	-6.04	-6.53
					123.8	-6.04	-6.47
					124	-6.29	-6.9
					124.2	-6.04	-7.45
					124.4	-5.86	-6.71
					124.6	-5.92	-6.41
					124.8	-6.47	-6.23
					125	-6.23	-6.04
					125.2	-6.1	-6.96
					125.4	-6.29	-6.41
					125.6	-6.35	-6.71
					125.8	-6.53	-6.29
					126	-6.65	-6.35
					126.2	-6.59	-6.29
					126.4	-6.78	-6.78
					126.6	-6.78	-6.35
					126.8	-6.1	-6.65
					127	-6.47	-5.74
					127.2	-6.59	-5.8
					127.4	-6.78	-6.1
					127.6	-6.35	-6.23
					127.8	-6.23	-6.16
					128	-6.59	-5.98
					128.2	-6.84	-5.92
					128.4	-6.65	-5.92
					128.6	-6.71	-6.04
					128.8	-6.96	-5.98
					129	-6.53	-6.35
					129.2	-6.23	-6.53
					129.4	-6.35	-6.1
					129.6	-6.23	-6.29
					129.8	-6.53	-5.43
					130	-6.71	-6.59
					130.2	-6.47	-5.98
					130.4	-6.84	-6.29
					130.6	-6.47	-6.47
					130.8	-6.29	-5.43
					131	-6.71	-5.19
					131.2	-6.78	-5.68
					131.4	-5.92	-6.35
					131.6	-6.35	-6.23
					131.8	-6.59	-6.1
					132	-6.71	-6.16
					132.2	-6.47	-6.59
					132.4	-6.29	-6.16
					132.6	-6.16	-6.23
					132.8	-5.86	-5.86
					133	-5.98	-5.98
					133.2	-6.35	-5.74
					133.4	-6.35	-5.68
					133.6	-6.23	-5.86
					133.8	-5.74	-6.1
					134	-5.86	-5.92
					134.2	-6.1	-5.55
					134.4	-5.01	-6.29
					134.6	-6.47	-5.49
					134.8	-6.04	-6.9
					135	-6.41	-7.02
					135.2	-5.86	-6.1
					135.4	-5.74	-6.04
					135.6	-6.35	-5.68
					135.8	-6.04	-6.47
					136	-5.62	-6.41
					136.2	-5.43	-5.92
					136.4	-5.55	-6.16
					136.6	-4.88	-6.1
					136.8	-5.62	-5.62
					137	-5.31	-5.74
					137.2	-5.25	-5.98
					137.4	-4.88	-6.23
					137.6	-5.19	-6.71
					137.8	-5.37	-6.59
					138	-6.04	-6.23
					138.2	-5.8	-6.47
					138.4	-5.86	-6.16
					138.6	-5.13	-6.41
					138.8	-5.74	-6.47
					139	-5.62	-6.1
					139.2	-6.35	-6.53
					139.4	-5.8	-6.29
					139.6	-5.62	-6.84
					139.8	-5.37	-6.23
					140	-5.13	-6.47
					140.2	-5.01	-6.23
					140.4	-5.25	-6.71
					140.6	-5.55	-6.35
					140.8	-5.37	-6.35
					141	-5.43	-7.08
					141.2	-5.25	-6.29
					141.4	-5.68	-6.65
					141.6	-5.62	-6.59
					141.8	-5.62	-6.78
					142	-5.01	-6.1
					142.2	-5.19	-6.29
					142.4	-5.43	-6.1
					142.6	-5.74	-5.98
					142.8	-6.04	-5.98
					143	-6.04	-6.29
					143.2	-6.1	-6.78
					143.4	-5.8	-5.86
					143.6	-5.98	-5.8
					143.8	-6.04	-5.86
					144	-5.98	-6.35
					144.2	-5.37	-6.9
					144.4	-5.92	-6.04
					144.6	-5.86	-6.1
					144.8	-6.35	-6.47
					145	-5.92	-6.47
					145.2	-6.04	-6.59
					145.4	-6.04	-5.86
					145.6	-6.41	-6.53
					145.8	-6.16	-6.84
					146	-6.29	-6.16
					146.2	-6.41	-5.92
					146.4	-6.53	-6.1
					146.6	-6.35	-5.98
					146.8	-6.59	-6.29
					147	-6.47	-5.86
					147.2	-6.59	-5.98
					147.4	-6.71	-5.8
					147.6	-6.47	-5.98
					147.8	-6.29	-6.04
					148	-6.65	-6.1
					148.2	-6.78	-5.55
					148.4	-6.59	-6.23
					148.6	-6.84	-6.04
					148.8	-6.47	-5.98
					149	-6.71	-6.1
					149.2	-6.35	-6.41
					149.4	-6.29	-6.1
					149.6	-6.16	-5.8
					149.8	-6.47	-5.37
					150	-6.23	-6.47
					150.2	-6.47	-5.8
					150.4	-7.08	-6.16
					150.6	-6.23	-6.23
					150.8	-6.04	-5.98
					151	-6.29	-5.13
					151.2	-7.14	-5.68
					151.4	-5.98	-6.1
					151.6	-6.35	-6.65
					151.8	-6.16	-5.86
					152	-6.59	-5.86
					152.2	-6.65	-5.62
					152.4	-6.23	-6.29
					152.6	-6.41	-6.35
					152.8	-5.86	-5.68
					153	-6.1	-5.68
					153.2	-6.65	-5.07
					153.4	-6.35	-5.55
					153.6	-6.04	-5.86
					153.8	-5.55	-5.62
					154	-5.62	-5.68
					154.2	-6.04	-5.68
					154.4	-4.64	-6.1
					154.6	-6.16	-5.43
					154.8	-5.98	-6.59
					155	-6.1	-6.65
					155.2	-5.8	-6.04
					155.4	-5.74	-5.74
					155.6	-6.29	-5.92
					155.8	-6.35	-6.59
					156	-5.98	-6.35
					156.2	-5.62	-5.49
					156.4	-5.25	-6.47
					156.6	-4.88	-6.04
					156.8	-5.43	-5.92
					157	-5.13	-6.23
					157.2	-5.19	-5.8
					157.4	-5.01	-5.8
					157.6	-5.19	-6.1
					157.8	-5.31	-5.68
					158	-6.04	-5.98
					158.2	-5.49	-6.29
					158.4	-5.98	-5.86
					158.6	-5.37	-5.8
					158.8	-5.62	-6.04
					159	-5.86	-6.47
					159.2	-5.98	-6.29
					159.4	-5.8	-6.47
					159.6	-5.43	-6.23
					159.8	-5.43	-6.29
					160	-5.31	-6.47
					160.2	-4.88	-5.98
					160.4	-5.13	-6.59
					160.6	-5.31	-6.35
					160.8	-5.31	-6.29
					161	-5.55	-7.39
					161.2	-5.13	-6.47
					161.4	-5.62	-6.96
					161.6	-5.25	-6.29
					161.8	-5.37	-6.78
					162	-5.25	-6.47
					162.2	-5.62	-5.86
					162.4	-5.25	-5.8
					162.6	-6.16	-6.53
					162.8	-6.1	-6.23
					163	-6.04	-6.53
					163.2	-6.04	-6.35
					163.4	-5.62	-6.1
					163.6	-5.68	-6.35
					163.8	-6.41	-6.47
					164	-5.98	-6.23
					164.2	-5.62	-7.2
					164.4	-5.62	-6.78
					164.6	-6.1	-6.47
					164.8	-6.04	-6.04
					165	-6.35	-6.53
					165.2	-5.98	-6.96
					165.4	-6.35	-6.53
					165.6	-6.29	-6.16
					165.8	-6.16	-6.65
					166	-6.29	-6.35
					166.2	-6.29	-6.04
					166.4	-6.23	-6.1
					166.6	-6.16	-6.23
					166.8	-6.41	-6.96
					167	-6.1	-6.16
					167.2	-6.53	-5.8
					167.4	-6.59	-5.55
					167.6	-6.35	-5.74
					167.8	-6.23	-6.41
					168	-6.53	-6.47
					168.2	-7.02	-5.98
					168.4	-6.78	-6.23
					168.6	-6.59	-5.62
					168.8	-6.53	-6.29
					169	-6.53	-6.04
					169.2	-6.16	-7.02
					169.4	-6.29	-6.04
					169.6	-6.53	-6.29
					169.8	-6.35	-6.1
					170	-6.41	-6.1
					170.2	-6.47	-6.29
					170.4	-6.71	-6.23
					170.6	-6.16	-5.74
					170.8	-6.1	-5.19
					171	-6.71	-5.43
					171.2	-6.59	-5.19
					171.4	-6.1	-6.04
					171.6	-6.23	-6.47
					171.8	-6.04	-5.49
					172	-6.35	-5.8
					172.2	-6.1	-5.74
					172.4	-6.35	-6.35
					172.6	-6.23	-6.04
					172.8	-5.8	-5.43
					173	-5.8	-5.07
					173.2	-6.16	-5.25
					173.4	-6.59	-5.37
					173.6	-6.04	-5.55
					173.8	-5.74	-5.74
					174	-5.8	-5.68
					174.2	-5.92	-5.55
					174.4	-5.25	-5.86
					174.6	-5.55	-5.19
					174.8	-5.86	-6.47
					175	-6.41	-6.71
					175.2	-5.37	-6.16
					175.4	-5.92	-5.74
					175.6	-6.1	-5.74
					175.8	-6.16	-6.35
					176	-5.43	-5.68
					176.2	-5.62	-6.04
					176.4	-5.31	-5.98
					176.6	-5.25	-6.23
					176.8	-5.19	-5.74
					177	-4.94	-5.68
					177.2	-5.19	-5.55
					177.4	-4.88	-5.92
					177.6	-4.94	-5.8
					177.8	-5.74	-5.86
					178	-5.8	-5.68
					178.2	-5.92	-5.98
					178.4	-6.23	-5.86
					178.6	-5.13	-5.98
					178.8	-5.86	-5.92
					179	-5.49	-6.1
					179.2	-5.98	-6.16
					179.4	-5.62	-6.16
					179.6	-5.62	-6.16
					179.8	-5.25	-6.29
					180	-4.88	-6.1
					180.2	-5.25	-5.8
					180.4	-4.94	-6.47
					180.6	-5.86	-6.1
					180.8	-4.88	-6.16
					181	-5.43	-6.9
					181.2	-5.13	-6.9
					181.4	-5.74	-6.84
					181.6	-5.13	-6.41
					181.8	-5.37	-6.16
					182	-5.31	-6.47
					182.2	-5.8	-5.86
					182.4	-5.74	-6.1
					182.6	-5.92	-6.23
					182.8	-5.68	-6.1
					183	-5.98	-6.1
					183.2	-6.04	-6.1
					183.4	-6.23	-6.1
					183.6	-5.8	-6.23
					183.8	-6.29	-5.98
					184	-6.04	-6.1
					184.2	-5.74	-6.96
					184.4	-5.74	-6.29
					184.6	-5.62	-6.35
					184.8	-6.1	-5.55
					185	-5.8	-6.23
					185.2	-5.98	-6.71
					185.4	-5.86	-6.16
					185.6	-6.16	-6.23
					185.8	-6.16	-5.86
					186	-6.16	-6.23
					186.2	-6.23	-6.23
					186.4	-6.29	-5.98
					186.6	-6.35	-6.23
					186.8	-6.1	-7.45
					187	-6.16	-6.29
					187.2	-6.35	-6.23
					187.4	-6.96	-6.29
					187.6	-6.35	-6.1
					187.8	-6.16	-7.02
					188	-6.53	-6.23
					188.2	-6.71	-5.62
					188.4	-6.71	-6.23
					188.6	-6.71	-5.62
					188.8	-6.59	-5.98
					189	-6.35	-5.8
					189.2	-6.23	-6.16
					189.4	-6.47	-5.86
					189.6	-6.1	-5.55
					189.8	-6.16	-5.62
					190	-6.47	-5.86
					190.2	-6.23	-5.37
					190.4	-6.78	-5.92
					190.6	-6.1	-5.74
					190.8	-6.29	-5.43
					191	-6.53	-5.43
					191.2	-6.71	-5.55
					191.4	-6.41	-6.23
					191.6	-6.47	-6.71
					191.8	-6.23	-5.98
					192	-6.65	-5.74
					192.2	-6.23	-5.98
					192.4	-6.04	-5.86
					192.6	-6.41	-6.35
					192.8	-5.98	-5.74
					193	-5.37	-5.86
					193.2	-6.16	-5.25
					193.4	-6.23	-5.49
					193.6	-5.86	-5.98
					193.8	-5.74	-5.86
					194	-5.49	-5.43
					194.2	-5.92	-6.1
					194.4	-4.82	-6.23
					194.6	-6.23	-5.43
					194.8	-5.98	-6.71
					195	-6.59	-7.32
					195.2	-5.49	-6.35
					195.4	-5.74	-5.8
					195.6	-6.16	-6.04
					195.8	-6.29	-6.04
					196	-5.68	-6.16
					196.2	-5.62	-6.04
					196.4	-5.07	-5.8
					196.6	-5.13	-5.92
					196.8	-5.13	-5.74
					197	-5.25	-5.62
					197.2	-5.07	-5.98
					197.4	-4.88	-5.74
					197.6	-4.82	-5.49
					197.8	-5.07	-5.98
					198	-5.8	-5.74
					198.2	-5.55	-6.29
					198.4	-6.04	-5.98
					198.6	-5.31	-5.98
					198.8	-5.49	-6.35
					199	-5.31	-5.49
					199.2	-6.04	-6.47
					199.4	-5.68	-6.04
					199.6	-5.25	-6.41
					199.8	-5.49	-5.98
					200	-5.25	-5.68
					200.2	-5.19	-5.86
					200.4	-5.13	-6.47
					200.6	-5.62	-6.16
					200.8	-5.19	-6.35
					201	-5.01	-6.47
					201.2	-5.13	-6.35
					201.4	-5.74	-6.78
					201.6	-5.43	-6.16
					201.8	-5.25	-6.16
					202	-5.19	-5.68
					202.2	-5.62	-6.41
					202.4	-5.37	-6.29
					202.6	-6.35	-6.35
					202.8	-6.1	-5.8
					203	-5.92	-6.04
					203.2	-5.98	-6.35
					203.4	-5.86	-5.98
					203.6	-5.98	-5.74
					203.8	-6.16	-5.74
					204	-5.98	-6.59
					204.2	-5.86	-7.39
					204.4	-6.04	-6.23
					204.6	-5.8	-6.23
					204.8	-5.86	-6.41
					205	-5.74	-5.98
					205.2	-6.1	-6.53
					205.4	-5.74	-6.16
					205.6	-6.23	-5.86
					205.8	-6.16	-6.1
					206	-6.1	-6.47
					206.2	-6.35	-5.68
					206.4	-6.47	-5.74
					206.6	-6.29	-5.98
					206.8	-6.23	-6.41
					207	-5.86	-6.59
					207.2	-6.65	-6.29
					207.4	-6.78	-5.55
					207.6	-6.41	-5.74
					207.8	-6.29	-7.57
					208	-6.47	-6.04
					208.2	-6.9	-5.31
					208.4	-6.41	-6.16
					208.6	-6.84	-5.68
					208.8	-6.47	-5.49
					209	-6.35	-6.35
					209.2	-6.1	-6.78
					209.4	-6.53	-5.62
					209.6	-5.98	-5.74
					209.8	-6.16	-5.25
					210	-6.23	-5.74
					210.2	-6.59	-5.55
					210.4	-6.47	-5.92
					210.6	-6.04	-6.1
					210.8	-6.23	-5.68
					211	-6.23	-5.43
					211.2	-6.65	-5.49
					211.4	-6.1	-6.1
					211.6	-6.41	-6.35
					211.8	-6.29	-5.55
					212	-6.41	-5.31
					212.2	-6.35	-5.98
					212.4	-6.47	-6.16
					212.6	-6.53	-5.74
					212.8	-5.55	-5.62
					213	-5.8	-5.55
					213.2	-6.16	-5.25
					213.4	-6.29	-5.13
					213.6	-5.49	-5.62
					213.8	-5.8	-5.62
					214	-5.55	-4.94
					214.2	-6.35	-5.98
					214.4	-5.25	-5.68
					214.6	-5.98	-5.37
					214.8	-5.74	-6.29
					215	-6.47	-6.35
					215.2	-5.49	-5.8
					215.4	-5.68	-5.68
					215.6	-6.04	-5.74
					215.8	-6.23	-5.98
					216	-5.74	-6.1
					216.2	-5.92	-5.43
					216.4	-5.13	-5.98
					216.6	-4.76	-5.98
					216.8	-4.76	-5.43
					217	-5.25	-5.55
					217.2	-4.94	-6.47
					217.4	-4.88	-6.29
					217.6	-5.19	-6.53
					217.8	-5.37	-6.65
					218	-5.74	-6.23
					218.2	-5.43	-7.51
					218.4	-5.74	-6.9
					218.6	-5.25	-6.47
					218.8	-5.55	-6.9
					219	-5.68	-6.41
					219.2	-6.04	-6.78
					219.4	-5.74	-6.78
					219.6	-5.31	-6.59
					219.8	-5.19	-6.9
					220	-5.19	-7.32
					220.2	-5.19	-6.29
					220.4	-5.13	-7.39
					220.6	-5.62	-6.47
					220.8	-5.25	-7.32
					221	-5.31	-6.9
					221.2	-5.01	-6.29
					221.4	-5.43	-6.71
					221.6	-5.07	-6.78
					221.8	-5.13	-7.45
					222	-5.01	-6.78
					222.2	-5.49	-5.62
					222.4	-5.55	-6.16
					222.6	-5.55	-6.9
					222.8	-6.1	-7.14
					223	-5.98	-6.47
					223.2	-5.92	-7.32
					223.4	-5.68	-6.65
					223.6	-5.49	-5.92
					223.8	-6.59	-6.71
					224	-5.62	-7.32
					224.2	-5.68	-7.51
					224.4	-5.8	-6.9
					224.6	-5.74	-6.96
					224.8	-6.1	-6.96
					225	-5.62	-6.23
					225.2	-5.98	-6.84
					225.4	-5.62	-6.16
					225.6	-6.29	-6.84
					225.8	-6.1	-6.9
					226	-6.04	-6.65
					226.2	-6.35	-6.23
					226.4	-6.59	-5.92
					226.6	-6.29	-5.98
					226.8	-6.23	-6.78
					227	-6.35	-6.47
					227.2	-6.59	-6.35
					227.4	-6.78	-5.31
					227.6	-6.23	-5.49
					227.8	-6.47	-6.1
					228	-6.29	-5.62
					228.2	-6.9	-4.82
					228.4	-6.41	-6.04
					228.6	-6.59	-5.43
					228.8	-6.65	-5.62
					229	-6.71	-6.16
					229.2	-6.04	-6.04
					229.4	-6.16	-5.98
					229.6	-6.16	-5.74
					229.8	-6.35	-5.55
					230	-6.1	-5.8
					230.2	19	2
					230.4	12.5	2.5
					230.6	17	16
					230.8	20.5	20.5
					231	20.05	23.25
					231.2	20.75	21.65
					231.4	23.3	21.5
					231.6	23	22.3
					231.8	25.8	23.5
					232	25.05	24.55
					232.2	28.3	26.2
					232.4	29.5	28.7
					232.6	30.75	27.75
					232.8	33.3	31.6
					233	36.8	34.1
					233.2	37.2	34.7
					233.4	37.9	39.1
					233.6	39.35	36.55
					233.8	40.9	36.4
					234	41.25	37.45
					234.2	41.45	36.25
					234.4	45.65	40.45
					234.6	42.1	40.1
					234.8	43	37.6
					235	42.35	40.55
					235.2	43.6	46.9
					235.4	43	47.8
					235.6	43.75	46.65
					235.8	43.8	45.5
					236	45.675	48.175
					236.2	48	51.6
					236.4	46.6	52.7
					236.6	48.175	55.575
					236.8	46.225	55.025
					237	45.1	58.4
					237.2	50.075	55.875
					237.4	50.175	58.375
					237.6	50.025	59.925
					237.8	46.225	59.525
					238	45.35	58.05
					238.2	45.775	60.675
					238.4	47.175	57.975
					238.6	49.15	62.35
					238.8	44.825	56.225
					239	45.625	58.925
					239.2	42.425	57.125
					239.4	45.95	61.35
					239.6	47.15	61.85
					239.8	44.4	61.7
					240	47.825	61.525
					240.2	46.75	58.85
					240.4	45.875	62.375
					240.6	45.9	63.6
					240.8	51.15	64.35
					241	53.725	64.425
					241.2	54.025	66.225
					241.4	49.85	66.35
					241.6	52.825	66.325
					241.8	52.225	67.125
					242	57.825	68.325
					242.2	52.375	72.775
					242.4	53.275	72.075
					242.6	47.4	65.8
					242.8	50.05	67.65
					243	51.175	72.775
					243.2	50.2	68.8
					243.4	50.625	68.125
					243.6	48.025	65.825
					243.8	44.2	70.5
					244	49.375	77.775
					244.2	49.225	70.025
					244.4	46.75	74.35
					244.6	47.925	77.225
					244.8	48.95	72.45
					245	48.975	70.475
					245.2	49.975	68.875
					245.4	51.675	69.375
					245.6	51.05	65.75
					245.8	48.65	69.45
					246	50.8	72.9
					246.2	49.05	74.15
					246.4	44.6	72
					246.6	46.45	73.55
					246.8	47.3	72.4
					247	50.625	75.725
					247.2	48.3	74.8
					247.4	50.3	73.3
					247.6	55.9	75.9
					247.8	57.475	79.875
					248	55.575	77.775
					248.2	49.75	84.65
					248.4	49.8	81.1
					248.6	49.95	83.35
					248.8	50.25	87.25
					249	52	80.3
					249.2	51.5	76.4
					249.4	53.475	81.275
					249.6	50.875	86.075
					249.8	49.9	82.7
					250	51.125	80.425
					250.2	49.5	81.6
					250.4	47.5	78.8
					250.6	47.225	76.725
					250.8	48.575	78.575
					251	47.95	80.65
					251.2	51.1	81.9
					251.4	51.475	81.775
					251.6	52.025	83.025
					251.8	53.025	86.025
					252	49.175	81.275
					252.2	49.425	77.125
					252.4	51.125	79.325
					252.6	46.675	81.575
					252.8	52.8	84.5
					253	52.75	86.65
					253.2	52.725	86.025
					253.4	52.625	85.425
					253.6	50.6	89.8
					253.8	49.55	89.25
					254	53.65	86.65
					254.2	51.825	83.625
					254.4	57.075	88.575
					254.6	55.525	85.425
					254.8	55.8	80.7
					255	49.875	83.275
					255.2	50.65	80.95
					255.4	48.9	83.8
					255.6	48.05	80.85
					255.8	49.775	79.375
					256	50.825	75.025
					256.2	51.675	77.475
					256.4	54.575	75.175
					256.6	52.125	77.325
					256.8	53.225	79.725
					257	54.35	81.95
					257.2	56.825	80.525
					257.4	60.25	77.85
					257.6	57.325	80.025
					257.8	55.125	84.725
					258	56.95	86.05
					258.2	55.6	86
					258.4	54.05	86.35
					258.6	57.65	84.25
					258.8	57.625	82.925
					259	53.4	84
					259.2	51.05	82.65
					259.4	54.525	83.125
					259.6	53.825	81.325
					259.8	54.925	78.025
					260	53.225	80.525
					260.2	54.725	86.625
					260.4	55.075	86.775
					260.6	54.975	91.475
					260.8	58.925	93.225
					261	55	93.1
					261.2	54.5	94.7
					261.4	54.875	90.675
					261.6	54.275	91.575
					261.8	56.075	91.575
					262	56.625	90.925
					262.2	56.275	83.975
					262.4	54.525	86.725
					262.6	52.95	88.75
					262.8	53.35	92.85
					263	51.2	89.9
					263.2	51.4	94.2
					263.4	54.15	95.45
					263.6	54.85	93.95
					263.8	51.05	92.75
					264	54.375	92.875
					264.2	52.525	93.325
					264.4	54.35	91.95
					264.6	55.525	94.225
					264.8	55.3	90.3
					265	56.05	94.65
					265.2	53.85	92.25
					265.4	52.725	89.325
					265.6	55.5	91.2
					265.8	55.175	89.175
					266	55.65	97.45
					266.2	58.1	98.3
					266.4	56.45	99.45
					266.6	55.35	104.85
					266.8	57.6	105.3
					267	54.9	99
					267.2	55.15	99.45
					267.4	52.8	97.7
					267.6	54.6	102.7
					267.8	57.65	103.45
					268	53.125	99.225
					268.2	51.775	99.475
					268.4	52.6	107.7
					268.6	49.725	104.225
					268.8	49.725	101.925
					269	54.4	104
					269.2	53.05	102.15
					269.4	54.6	107.3
					269.6	51.85	107.85
					269.8	50.65	110.85
					270	49.7	110.3
					270.2	50.375	108.075
					270.4	52.725	108.525
					270.6	52.6	108.9
					270.8	50.45	110.45
					271	49.55	113.45
					271.2	49.85	113.85
					271.4	50.225	115.825
					271.6	52	113.6
					271.8	53.4	112.6
					272	53.7	111.7
					272.2	56.175	113.375
					272.4	56.3	112.9
					272.6	56.1	108.3
					272.8	54.525	111.525
					273	52.35	109.05
					273.2	56.7	108.9
					273.4	54.15	101.75
					273.6	58.125	106.125
					273.8	60.975	105.375
					274	59.675	109.975
					274.2	59.55	112.75
					274.4	61	118.8
					274.6	54.175	118.375
					274.8	54.55	111.05
					275	51.45	112.05
					275.2	55.425	117.125
					275.4	55.05	119.05
					275.6	54.725	117.225
					275.8	54.2	119.9
					276	55.925	121.125
					276.2	59.15	121.05
					276.4	60	116.9
					276.6	58.85	113.35
					276.8	53.65	111.05
					277	56.45	114.95
					277.2	57.475	117.275
					277.4	52.75	116.65
					277.6	57	112.2
					277.8	58.2	112.5
					278	51.275	110.275
					278.2	53.425	112.425
					278.4	54.225	111.125
					278.6	54.55	112.35
					278.8	54.3	112.6
					279	56	117.2
					279.2	52	113.9
					279.4	54.5	115.6
					279.6	53.575	117.275
					279.8	54.825	118.425
					280	54.05	115.35
					280.2	55.9	112.8
					280.4	54.85	118.05
					280.6	54.325	118.125
					280.8	59.45	121.65
					281	64.05	123.65
					281.2	64.1	122.8
					281.4	61.25	120.35
					281.6	58.05	116.75
					281.8	57.7	120.9
					282	59.35	120.35
					282.2	62.55	121.75
					282.4	62.6	118.2
					282.6	64.725	116.825
					282.8	63.925	113.825
					283	60.725	118.825
					283.2	63.725	121.125
					283.4	59.125	120.225
					283.6	60.325	123.525
					283.8	57.225	119.825
					284	56.975	122.275
					284.2	58.475	123.275
					284.4	59.425	119.825
					284.6	59.975	121.275
					284.8	59.55	120.75
					285	60.725	123.125
					285.2	58.15	119.05
					285.4	59.625	121.425
					285.6	58.775	123.375
					285.8	58.875	123.975
					286	56.275	123.375
					286.2	57.1	122.9
					286.4	55.3	118.9
					286.6	54.825	116.225
					286.8	53.425	117.525
					287	50.025	119.225
					287.2	48.55	122.75
					287.4	50.35	119.15
					287.6	54.7	119.6
					287.8	56.05	119.05
					288	55.4	120.3
					288.2	53.525	125.225
					288.4	56.8	127.7
					288.6	55	130
					288.8	51.2	130.9
					289	50.55	124.05
					289.2	50.5	121.3
					289.4	51.8	121.3
					289.6	56.275	125.375
					289.8	57	126.9
					290	55.575	121.375
					290.2	56.1	120.9
					290.4	56.35	119.45
					290.6	57.925	125.125
					290.8	62.725	120.525
					291	58.9	117.9
					291.2	54.1	127.6
					291.4	52.225	123.225
					291.6	54.625	126.825
					291.8	53.35	130.05
					292	48.85	130.15
					292.2	54.1	128.9
					292.4	52.375	127.375
					292.6	51.3	125
					292.8	55.8	133.9
					293	56.4	131.6
					293.2	56.625	135.225
					293.4	53.625	136.525
					293.6	59.15	134.75
					293.8	58.1	137.6
					294	56.725	134.425
					294.2	60	124.6
					294.4	64.375	128.575
					294.6	55.775	122.975
					294.8	53.925	121.525
					295	54.95	129.05
					295.2	60.15	132.65
					295.4	57.8	136.6
					295.6	58.475	132.975
					295.8	59.675	128.375
					296	58.6	131.5
					296.2	60.8	128.2
					296.4	59.875	128.275
					296.6	60.3	133.5
					296.8	56.425	132.125
					297	56.6	131.8
					297.2	58.575	134.275
					297.4	58.375	138.875
					297.6	57.825	141.725
					297.8	57.4	140.5
					298	55.2	138.5
					298.2	58.45	133.65
					298.4	54.525	129.425
					298.6	57.625	135.725
					298.8	52.7	134.9
					299	52.3	135.5
					299.2	52.625	138.425
					299.4	52.6	136.5
					299.6	52	134.5
					299.8	54.325	134.125
					300	55.875	133.575
					300.2	56.425	134.725
					300.4	55.35	129.95
					300.6	54.1	132.2
					300.8	54.475	134.575
					301	56.15	135.95
					301.2	60.775	131.575
					301.4	56.65	128.75
					301.6	57.125	131.125
					301.8	54.1	128.5
					302	55.675	128.875
					302.2	57	131.5
					302.4	59.95	128.35
					302.6	56.275	130.275
					302.8	61.425	129.825
					303	62.025	132.125
					303.2	61.425	134.425
					303.4	60.275	133.675
					303.6	56.325	131.125
					303.8	57.775	129.675
					304	55.95	131.75
					304.2	54.45	125.05
					304.4	53.625	131.425
					304.6	54.725	131.425
					304.8	56	131.9
					305	57.925	133.825
					305.2	56.975	132.275
					305.4	57.675	135.275
					305.6	59.175	130.975
					305.8	59.825	131.125
					306	56.725	134.825
					306.2	54.675	133.675
					306.4	53.875	130.675
					306.6	59.175	137.675
					306.8	54.175	140.975
					307	54.975	136.675
					307.2	55.175	136.375
					307.4	52.5	130.6
					307.6	55.625	129.825
					307.8	53.425	129.525
					308	55.325	136.125
					308.2	52.95	136.75
					308.4	53.15	135.45
					308.6	54.6	129.3
					308.8	57.825	131.225
					309	58.65	129.75
					309.2	60.45	132.05
					309.4	60.6	134.9
					309.6	58.725	134.125
					309.8	57.475	131.675
					310	57.025	133.225
					310.2	55.575	135.975
					310.4	50.75	134.45
					310.6	56.025	138.125
					310.8	56.875	139.975
					311	53.875	138.375
					311.2	51.1	136.3
					311.4	53.875	135.975
					311.6	53.375	132.675
					311.8	51.925	136.225
					312	51.15	137.45
					312.2	53.875	140.675
					312.4	55.675	136.675
					312.6	53	133.9
					312.8	49.975	133.275
					313	51.3	133.2
					313.2	52.475	136.275
					313.4	53.675	136.275
					313.6	52.9	132.6
					313.8	53.45	135.05
					314	57.3	137.9
					314.2	57.475	134.275
					314.4	56.175	138.275
					314.6	53.5	134.2
					314.8	52.075	132.975
					315	53.725	128.825
					315.2	56.75	129.75
					315.4	55.35	129.35
					315.6	54.075	131.675
					315.8	54.675	131.975
					316	55.95	132.75
					316.2	57.05	136.35
					316.4	58.975	139.275
					316.6	61.825	139.425
					316.8	58.2	137.8
					317	54.525	140.725
					317.2	53.375	138.575
					317.4	56.625	134.025
					317.6	55.875	135.575
					317.8	52.225	139.725
					318	53.1	132.9
					318.2	56.55	133.35
					318.4	55.65	135.05
					318.6	54.675	137.275
					318.8	54.1	132.2
					319	55.4	135.2
					319.2	54.025	133.125
					319.4	56	133.8
					319.6	57.65	135.35
					319.8	54.875	133.275
					320	57.275	134.275
					320.2	59.675	136.275
					320.4	57.325	139.125
					320.6	60	143.5
					320.8	59.275	139.575
					321	60.825	139.425
					321.2	59.95	138.95
					321.4	57.1	135.9
					321.6	59.05	140.65
					321.8	58.7	137.8
					322	59.125	141.425
					322.2	56.4	138.8
					322.4	58.65	140.65
					322.6	57.85	137.05
					322.8	60.25	137.75
					323	55.875	136.275
					323.2	53.525	137.425
					323.4	54.9	142.6
					323.6	58	148.9
					323.8	57.2	146.9
					324	55.875	140.275
					324.2	59.1	147.9
					324.4	60.15	147.35
					324.6	61	150.2
					324.8	58.425	144.825
					325	60.325	139.425
					325.2	62.65	135.75
					325.4	58.275	139.275
					325.6	58.725	137.125
					325.8	53.775	137.675
					326	53.775	137.375
					326.2	54.425	138.525
					326.4	49.75	137.05
					326.6	52.35	140.05
					326.8	56.15	137.75
					327	53.025	140.825
					327.2	51.225	138.525
					327.4	53.25	137.05
					327.6	53.925	137.125
					327.8	55.125	137.425
					328	54.625	133.525
					328.2	52.7	140.9
					328.4	52.475	141.375
					328.6	47.725	142.225
					328.8	50.1	139.6
					329	53.475	138.675
					329.2	54.425	140.425
					329.4	52.425	142.125
					329.6	51.725	143.425
					329.8	51.575	148.675
					330	54.425	142.225
					330.2	51.225	148.825
					330.4	51.6	140.9
					330.6	54.825	136.825
					330.8	55.275	143.275
					331	52.325	141.225
					331.2	56.25	139.05
					331.4	58	141.2
					331.6	57.525	140.125
					331.8	55.025	143.525
					332	56.325	142.225
					332.2	58.125	139.825
					332.4	55.475	137.275
					332.6	60.4	135.6
					332.8	59.15	143.35
					333	60.35	147.05
					333.2	58.125	146.125
					333.4	52.925	145.125
					333.6	55.925	143.425
					333.8	57.25	145.65
					334	59.15	141.35
					334.2	57.05	142.75
					334.4	61.275	144.475
					334.6	50.125	140.825
					334.8	49.8	141.9
					335	55.275	140.975
					335.2	59.15	143.35
					335.4	58.35	141.65
					335.6	54.625	144.125
					335.8	55.4	144.9
					336	55.25	141.95
					336.2	53.325	140.425
					336.4	55.525	144.125
					336.6	57.4	148.8
					336.8	58.55	143.95
					337	63.325	150.725
					337.2	62.875	155.875
					337.4	63.2	154.8
					337.6	61.325	151.025
					337.8	60.275	146.575
					338	56.8	143.9
					338.2	55.4	146.5
					338.4	57.95	154.35
					338.6	57.875	150.175
					338.8	52.75	149.65
					339	54.15	147.95
					339.2	54.225	153.125
					339.4	52.4	151.5
					339.6	54.55	152.95
					339.8	55.075	151.575
					340	55.175	150.175
					340.2	56.175	151.475
					340.4	58.475	149.875
					340.6	60.725	151.125
					340.8	60.475	150.575
					341	57.625	149.425
					341.2	56.875	151.875
					341.4	53.2	152.8
					341.6	53.25	153.95
					341.8	54.45	151.95
					342	56.875	155.475
					342.2	53.525	161.025
					342.4	54.925	156.425
					342.6	57.15	149.65
					342.8	59.8	150.9
					343	60.3	152.9
					343.2	59.55	151.75
					343.4	59.9	152.5
					343.6	62.45	151.05
					343.8	61.7	152.9
					344	58.25	151.05
					344.2	59.975	147.575
					344.4	62.3	145.2
					344.6	62.25	143.35
					344.8	52.525	141.125
					345	55.2	143.2
					345.2	58	147.9
					345.4	59.9	150.9
					345.6	55.575	147.975
					345.8	56.2	144.6
					346	55.875	148.275
					346.2	54.475	149.975
					346.4	51.375	149.675
					346.6	54.525	149.125
					346.8	52.825	149.525
					347	56.425	157.825
					347.2	56.625	157.525
					347.4	54.825	153.225
					347.6	55.225	156.825
					347.8	57.975	155.275
					348	52.375	157.375
					348.2	50.25	158.05
					348.4	50.925	156.525
					348.6	51.4	153.9
					348.8	55.325	156.825
					349	54.825	162.225
					349.2	53.625	154.125
					349.4	50.675	146.275
					349.6	52	150.6
					349.8	50.125	144.825
					350	51.425	142.425
					350.2	53.225	144.825
					350.4	52	150.3
					350.6	55.325	147.425
					350.8	57.2	155.9
					351	54.475	151.275
					351.2	54.65	149.15
					351.4	60.75	148.05
					351.6	55.625	146.125
					351.8	57.9	153.6
					352	56.925	149.525
					352.2	54.175	146.375
					352.4	53.525	150.425
					352.6	52.175	154.975
					352.8	57.15	155.35
					353	57.05	155.75
					353.2	57.075	157.375
					353.4	55.025	147.125
					353.6	56.5	150.9
					353.8	57.225	156.125
					354	57.15	156.95
					354.2	55.3	156.9
					354.4	62.9	165.4
					354.6	60	162.6
					354.8	54.35	156.05
					355	53.55	154.75
					355.2	54.1	156.5
					355.4	55.75	155.65
					355.6	59.575	160.275
					355.8	57.825	161.125
					356	57.95	167.05
					356.2	57.25	167.95
					356.4	56.175	165.875
					356.6	58.2	163.8
					356.8	56.425	158.425
					357	61.275	158.175
					357.2	63.725	164.025
					357.4	63.575	167.475
					357.6	62.825	165.025
					357.8	61.625	163.725
					358	55	162.9
					358.2	53.975	162.275
					358.4	58.05	165.05
					358.6	60.175	167.575
					358.8	60.55	162.95
					359	57.25	159.35
					359.2	55.75	160.05
					359.4	58.6	158.5
					359.6	61.325	157.425
					359.8	62.325	158.425
					360	58.325	159.725
					360.2	62.1	162.8
					360.4	59.275	159.175
					360.6	56.925	163.725
					360.8	55.425	160.725
					361	53.325	162.125
					361.2	53.175	158.175
					361.4	53.15	153.95
					361.6	54.375	149.875
					361.8	50.175	154.575
					362	51.575	155.875
					362.2	50.85	156.95
					362.4	54.275	160.875
					362.6	49.6	158.6
					362.8	54.05	153.75
					363	53.7	157.9
					363.2	53.6	155.9
					363.4	55.35	156.95
					363.6	56.4	155.8
					363.8	53.375	147.975
					364	54.15	153.05
					364.2	56.65	154.95
					364.4	57.45	156.95
					364.6	55.25	150.75
					364.8	53.1	146.9
					365	53.725	144.125
					365.2	57.55	151.05
					365.4	56.425	151.125
					365.6	56.175	150.275
					365.8	57.4	154.6
					366	56.875	154.275
					366.2	57.375	156.275
					366.4	62.025	160.425
					366.6	57.3	164.6
					366.8	51.775	157.975
					367	55.45	157.75
					367.2	54.875	152.675
					367.4	55.425	153.525
					367.6	59.625	153.125
					367.8	62.325	155.425
					368	58.575	163.675
					368.2	58.85	161.45
					368.4	54.25	161.05
					368.6	56.725	160.525
					368.8	60.475	161.675
					369	61.875	156.675
					369.2	60	165.6
					369.4	61.875	165.275
					369.6	60.675	161.675
					369.8	58.125	157.125
					370	60.575	159.975
					370.2	58.225	154.825
					370.4	56.625	153.225
					370.6	56.7	160.6
					370.8	55.35	159.75
					371	51.425	154.225
					371.2	53.225	153.525
					371.4	54.35	153.75
					371.6	53.725	154.425
					371.8	52.2	153.9
					372	53.325	153.125
					372.2	57.35	153.75
					372.4	54.325	149.125
					372.6	58.925	150.425
					372.8	57.9	152.5
					373	56.8	156.5
					373.2	57.2	154.6
					373.4	55.125	159.525
					373.6	55.6	155.9
					373.8	55.75	154.65
					374	52.6	149.5
					374.2	49	145.2
					374.4	51.675	148.875
					374.6	51.925	150.125
					374.8	48.95	149.35
					375	45.675	148.975
					375.2	49.675	153.575
					375.4	45.1	155.2
					375.6	44.65	149.75
					375.8	46.5	144.6
					376	51.525	146.425
					376.2	51.45	149.95
					376.4	51.125	148.725
					376.6	53.375	146.875
					376.8	50.925	153.025
					377	52.75	156.65
					377.2	55.125	156.025
					377.4	54.6	154.8
					377.6	56.85	154.65
					377.8	54.85	155.65
					378	52.9	156.5
					378.2	51	154.2
					378.4	47.325	157.425
					378.6	52.875	155.175
					378.8	47.25	155.35
					379	45.975	151.275
					379.2	45.85	147.05
					379.4	48.95	152.95
					379.6	48.95	146.95
					379.8	51.575	143.875
					380	55.4	148.8
					380.2	55.375	148.875
					380.4	58.35	147.65
					380.6	57.85	146.35
					380.8	64.1	149.8
					381	58.325	147.425
					381.2	55.975	148.175
					381.4	50.75	141.65
					381.6	51.875	136.175
					381.8	52.175	144.575
					382	52.425	145.725
					382.2	52.4	144.5
					382.4	51.85	150.65
					382.6	51.2	153.2
					382.8	49.9	148.8
					383	49.15	144.05
					383.2	51.5	144.9
					383.4	52.125	143.425
					383.6	55.2	149.5
					383.8	52.875	148.275
					384	54.6	146.9
					384.2	56.35	144.65
					384.4	55.65	150.65
					384.6	56.45	160.95
					384.8	54.05	157.75
					385	58	164.5
					385.2	58.25	162.05
					385.4	53.55	159.35
					385.6	53.4	152.6
					385.8	54.8	153.6
					386	54.1	151.6
					386.2	54.525	149.425
					386.4	50.975	155.275
					386.6	47.625	157.125
					386.8	48.95	157.75
					387	49.8	155.6
					387.2	51.025	155.125
					387.4	47	149.6
					387.6	47.025	155.125
					387.8	50.4	158.6
					388	49.175	156.675
					388.2	49.725	164.225
					388.4	47.925	163.225
					388.6	47.525	157.225
					388.8	50.625	154.525
					389	48.525	158.125
					389.2	50.925	160.425
					389.4	52.025	157.825
					389.6	51.75	159.75
					389.8	53.7	159.6
					390	53.225	152.825
					390.2	55.825	150.425
					390.4	51.15	157.05
					390.6	54.05	157.75
					390.8	54.475	155.275
					391	53.475	164.675
					391.2	52.625	156.225
					391.4	53.775	150.975
					391.6	60.125	151.825
					391.8	59.025	155.425
					392	54.175	152.375
					392.2	52.025	148.425
					392.4	51.8	149.9
					392.6	52.975	152.975
					392.8	54.25	152.05
					393	56.375	157.575
					393.2	55.2	153.6
					393.4	50.925	155.425
					393.6	53.85	153.35
					393.8	55.65	158.65
					394	55.275	164.275
					394.2	51.5	161.2
					394.4	53.45	159.95
					394.6	47.425	153.425
					394.8	50.45	153.05
					395	48.825	154.525
					395.2	52.875	160.275
					395.4	53.95	163.65
					395.6	57.9	164.6
					395.8	54.175	166.275
					396	55.7	167.8
					396.2	54.95	168.95
					396.4	58.025	165.325
					396.6	57.475	166.175
					396.8	58.475	164.175
					397	59.175	165.875
					397.2	61.825	169.325
					397.4	59	172.8
					397.6	59.45	169.95
					397.8	57.525	170.325
					398	56.8	168.5
					398.2	56.425	168.125
					398.4	59.2	159.9
					398.6	60.125	159.725
					398.8	58.975	163.275
					399	55.425	165.725
					399.2	54.5	159.9
					399.4	54.9	163.8
[truncated: 1,302 more rows]
