# Supplementary material for: Direct modulation of TRPM8 ion channels by rapamycin and analog macrolide immunosuppressants
Source: eLife. 2025 Sep 30;13:RP97341. doi: 10.7554/eLife.97341 (PMC12483518; doi:10.7554/eLife.97341)
Supplement: Figure 3—figure supplement 2—source data 1. [file elife-97341-fig3-figsupp2-data1.xlsx]

## Sheet: Fig 3-Fig Suppl 2B
	menthol	rapa	iono
	3.77502	112.559	2402.94
	5.23118	239.029	2719.29
	3.89866	151.105	1287.45
	2.20294	98.8061	742.881
	0.28136	112.837	1700.77
	1.59376	132.321	2463.29
	2.69814	184.728	3345.12
	2.39854	137.08	3234.51
	8.83911	109.73	806.795
	12.2596	90.493	1413.89
	0.58669	296.176	1443.55
	11.9045	142.235	3031.91
	3.33434	99.5128	1511.26
	3.69214	95.2681	806.9
	6.43061	126.845	764.479
	2.25228	104.554	1612.41
	4.53932	136.645	2523.13
	2.44261	127.341	1113.64
	3.00867	155.391	3490.58
	2.64531	149.111	4858.32
	2.77583	112.322	4436.22
	4.65868	220.821	5319.57
	0.93976	192.179	1331.67
	0.9412	178.594	5954.59
	6.13782	94.4484	1141.68
	1.62525	183.619	2363.62
	16.2481	88.6797	983.311
	4.99465	147.227	1242.82
	0.2605	132.92	1378.3
	2.05711	108.558	1912.81
	27.2876	115.764	2354.98
	5.46218	124.944	2136.89
	0.14981	65.7073	1518.8
	11.8437	131.716	1518.56
	-0.32996	105.278	2146.95
	0.12204	130.806	3555.65
	96.7295	39.9706	1557.47
	9.99781	118.221	1723.55
	-2.5495	269.193	2202.67
	3.07456	225.667	3498.86
	0.30623	176.515	7078.31
	1.20437	167.631	4259.12
	1.05826	160.37	1987.13
	1.11411	150.902	1226.38
	-2.03892	97.821	3331.37
	3.20833	199.678	2100.28
	0.70282	141.896	5081.28
	6.22624	178.987	3249.59
	7.09775	88.5118	2950.33
	4.76621	119.355	2876.81
	1.04216	133.557	3744.87
	3.4343	91.1243	2241.32
	0.88165	146.325	3453.71
	1.63744	134.383	2514.53
	6.59145	141.925	1074.41
	9.56302	62.6477	1403.53
	3.81049	103.839	1134.94
	0.96532	163.26	2294.48
	2.6885	109.775	1352.94
	2.71267	111.417	3012.99
	4.46425	106.203	2480.47
	2.37992	177.136	1947.95
	5.55098	148.832	1693.68
	4.40908	163.374	1816.25
	1.3713	111.189	1581.87
	0.02747	149.069	1955.44
	7.24249	164.651	3031.14
	2.49885	110.392	2597.26
	0.07804	215.658	1051.47
	5.86543	85.9319	1193.84
	3.8069	129.79	3479.83
	2.41409	202.342	3956.75
	27.6884	115.129	1579.05
	-1.33033	162.682	2580.21
	10.3672	199.75	1516.81
	4.0959	168.307	2638.4
	2.09188	176.396	3198.88
	5.10888	120.799	4177.91
	4.74621	143.283	2102.96
	0.80432	144.172	3179.97
	1.81349	74.1457	1312.88
	3.5914	163.43	3666.81
	2.00527	31.9124	875.103
	0.30706	74.7286	1421.51
	1.82394	88.2144	3058.84
	8.66999	122.782	1725.32
	7.36151	130.608	1071.38
	4.05112	123.294	3287.18
	1.28322	124.397	2705.68
	1.57211	143.348	1440.33
	1.60132	153.799	2644.08
	3.90014	136.958	6025.06
	3.03125	126.793	2591.67
	1.79603	200.611	4582.99
	3.87707	110.023	2222.23
	1.57521	142.578	1768.93
	0.78239	118.226	4186.28
	1.36047	82.5806	1823.3
	4.44727	98.0621	3518.77
	35.1735	199.086	3520.59
	10.0555	122.184	2773.05
	44.6717	173.842	2390.58
	1.90312	142.529	5287.54
	1.07618	112.456	1683.69
	5.28128	123.42	1976.64
	3.23148	92.2224	1179.65
	3.04487	139.744	3317
	6.66963	132.547	3260.97
	4.36925	106.468	1891.48
	1.21466	95.3969	927.762
	0.75109	141.994	2376.63
	0.93734	152.853	1280.5
	17.4382	185.096	5751.2
	0	0	0
