# Supplementary material for: Direct modulation of TRPM8 ion channels by rapamycin and analog macrolide immunosuppressants
Source: eLife. 2025 Sep 30;13:RP97341. doi: 10.7554/eLife.97341 (PMC12483518; doi:10.7554/eLife.97341)
Supplement: Figure 3—source data 1. [file elife-97341-fig3-data1.xlsx]

## Sheet: Figure 3B
	WT	Y745H	D796A	M801A	D802A	G805A	R842H	H845A	F847A	V849M	R851K	R851Q	Q861A
	0.48281	1.00644	0.30485	0.53475	0.18875	0.32304	1.00348	0.81833	0.97613	0.9892	0.896	0.75953	0.0863
	0.51808	1.00566	0.30175	0.7944	0.09888	0.18506	1.00255	0.93781	0.99513	0.98629	0.86276	0.65954	0.02329
	0.51311	1.00247	0.53062	0.78096	0.3131	0.27302	0.99938	0.78554	0.97609	0.88929	0.96181	0.90694	0.0389
	0.5006	1.00211	0.38406	0.35598	0.00636	0.27023	1.00186	0.37224	0.99804	0.97722	0.89227	0.72876	0.12156
	0.47583	1.00025	0.37997	0.75139	0.00374	0.42029	0.99725	0.83334	0.86757	0.96554	0.80598	0.7605	0.27784
	0.45784	0.99933	0.17281	0.66984	0.34622	0.37883	1.0011	0.61272	0.88069	0.98	0.76955	0.77158	0.18341
	0.39577	1.00929	0.19047	0.55671	0.25803	0.37505	1.00129	0.65531	0.99591	0.99862	0.47559	0.65934	0.14925
	0.46164	1.00067	0.38423	0.58102	0.22322	0.27519	1.00217	0.63344	0.98915	0.99081	0.62781	0.68092	0.07882
	0.48596	1.00184	0.16463	0.53909	0.23627	0.3684	1.00379	0.62286	0.99802	0.99109	0.91974	0.99178	0.20772
	0.51229	1.00214	0.36139	0.58972	0.22994	0.409	0.93201	0.81465	0.96758	0.90103	0.64281	0.66252	0.17617
	0.47972	1.00844	0.30154	0.42993	0.10473	0.35464	1.0016	0.71707	0.95066	0.99887	0.69358	0.77934	0.01636
	0.22151	1.00214	0.33671	0.62253	0.00155	0.15683	1.00335	0.56693	0.9175	0.99415	0.60881	0.91344	0.14346
	0.47356	1.00268	0.38622	0.48847	0.21329	0.40374	1.00159	0.56256	0.99773	0.92425	0.59192	0.75535	0.05505
	0.52156	0.99991	0.47762	0.48847	0.23231	0.34426	1.0027	0.79953	0.2924	0.9769	0.55271	0.93624	0.09541
	0.5337	1.00058	0.10667	0.52718	0.29664	0.34036	1.00126	0.64596	0.80613	0.98729	0.6279	0.70151	0.04451
	0.57446	1.00163	0.11897	0.57443	0.02942	0.19486	1.0019	0.98507	0.98782	0.9922	0.61798	0.90858	0.07727
	0.5351	1.00381	0.28523	0.58584	0.36345	0.24229	1.00055	0.41612	0.97891	0.89315	0.5139	0.80145	0.05958
	0.51274	1.00182	0.27248	0.55017	0.33797	0.37786	1.00208	0.54395	0.99052	0.99778	0.62047	0.7298	0.04831
	0.5842	1.00175	0.14759	0.56566	0.00307	0.30214	1.00102	0.648	0.96404	0.99749	0.54925	0.82757	0.07659
	0.65258	1.00231	0.18932	0.55926	0.31521	0.26919	1.00203	0.62622	0.99751	0.99907	0.56978	0.4047	0.11455
	0.74207	1.00408	0.12229	0.56318	0.43169	0.17226	1.00058	0.73841	0.92203	0.9947	0.66475	0.42472	0.13416
	0.51643	1.00067	0.10582	0.54766	0.00818	0.28924	1.00421	0.72462	0.93404	0.9985	0.56448	0.65727	0.14248
	0.63005	1.00069	0.10794	0.6459	0.18609	0.16608	1.00064	0.59337	0.98907	0.98195	0.70766	0.97376	0.16833
	0.56731	0.99827	0.22697	0.50227	0.24153	0.12337	1.00092	0.92439	0.97372	0.98765	0.55528	0.96953	0.08753
	0.40919	0.9999	0.36879	0.61462	0.11513	0.04455	1.00331	0.49961	0.98379	0.90493	0.52089	0.94723	0.12672
	0.53539	1.00169	0.2052	0.53946	0.31021	0.35024	0.98585	0.54953	0.96058	1.00131	0.54749	0.54737	0.22809
	0.61078	1.00137	0.15968	0.62096	0.18739	0.40834	0.99594	0.46942	0.9814	0.96242	0.60236	0.94729	0.07062
	0.58443	1.00077	0.3569	0.51946	0.22763	0.24812	0.98977	0.49278	0.98674	0.99628	0.54281	0.67194	0.0964
	0.65135	1.00023	0.13347	0.53689	0.33229	0.19885	0.97925	0.61339	0.99982	0.99834	0.57222	0.81234	0.15003
	0.53835	1.00886	0.18465	0.58253	0.18125	0.36912	0.99244	0.81405	0.95896	0.99165	0.61134	0.62496	0.03713
	0.78673	1.00314	0.19005	0.63506	0.20588	0.51463	1.00485	0.89479	0.99344	1.00055	0.61148	0.95814	0.11966
	0.56066	1.00554	0.01934	0.61678	0.14775	0.39296	1.00038	0.67016	0.98419	0.9915	0.61159		0.09904
	0.76152	1.009	0.08375	0.62843	0.07361	0.23513	1.00226	0.87212	0.96794	0.9929	0.57763		0.03759
	0.5772	1.00049	0.38953	0.54921	0.07786	0.11959	0.99799	0.55144	0.95811	0.98332	0.64062		0.16484
	0.4103	0.9996	0.2697		0.26861	0.30628	0.99201	0.58984	1.00314	0.97377	0.63922		0.1372
	0.64814	1.00676	0.52608		0.20244	0.1917	1.00572	0.75515	1.00956	0.95274	0.54584		0.29081
	0.39913	1.00182	0.24621		0.1495	0.30246	1.00154	0.85887	0.96596	0.90056	0.51816		0.08986
	0.73892	1.0033	0.27593		0.37885	0.36972	0.98426	0.53167	0.96368	0.99776	0.56664		0.17302
	0.44228	1.00491	0.12672		0.18547	0.3102	1.00024	0.82353	0.99412	0.96357	0.62084		0.42815
	0.59269	1.00576	0.42232		0.0708	0.33357	0.99495	0.41319	0.80925	0.94532	0.59653		0.41397
	0.48541	1.00168	0.13449		0.16617	0.25749	1.00506	0.84199	0.99123	0.98322	0.57101		0.10621
	0.59473	1.0052	0.16163		0.13812	0.37925	1.00447	0.56043	0.99474	0.98602	0.58413		0.1802
	0.59919	0.95759	0.3048		0.06356	0.23435	0.9968	0.84605	0.79557	0.99754	0.60876		0.29812
	0.7029	1.00713	0.18116		0.13955	0.31161	1.00733	0.8289	0.96755	0.97563	0.47917		0.21543
	0.5384	1.00718	0.20134		0.17285	0.28433	1.00128	0.52265	0.9881	0.99749	0.53266		0.24277
	0.61785	1.00558	0.09255		0.31866	0.03868	1.00621	0.40933	0.95966	0.98578	0.55939		0.21964
	0.65903	1.00934	0.07445		0.1168	0.32869	1.00248	0.59564	0.98796	0.998	0.96072		0.04855
	0.5529	1.00555	0.21501		0.1307	0.46303	0.98966	0.50146	0.96785	0.98956	0.94259		0.03937
	0.56965	1.00568	0.00932		0.07616	0.16899	1.00106	0.8828	1.00824	0.98482	0.9547		0.14594
	0.61293	1.00663	0.07944		0.21069	0.22599	1.00158	0.27323	0.97665	0.93982			0.07471
	0.60097	0.99677	-0.0114		0.35435	0.19177	0.99985	0.59021	0.97786	1.0007			0.04069
	0.50121	1.00994	0.39383		0.1153	0.3993	1.00102	0.8487	0.97624	0.99467			0.02496
	0.65691	1.01777	0.11799		0.15539	0.39529	1.00229	0.62652	0.9897	1.00133
	0.59809	1.00334	0.2209		0.23173	0.34961	1.00811	0.54143	0.98979	1.00202
	0.59848	0.83733	0.10304		0.08143	0.15419	1.00739	0.69967	0.97858	1.00085
	0.69072	1.00251	0.20549		0.26025	0.31498	1.00331	0.48802	0.92396	1.00253
	0.83981	0.99949	0.24116		0.27643	0.32404	1.0226	0.93472	0.9616	1.00403
	0.8074	1.00097	0.13657		0.18746	0.24213	1.00731	0.76127	0.92576	1.00264
	0.5534	1.00106	0.15039		0.08289	0.4137	1.00021	0.49869	0.97623	1.0165
	0.582	1.00127	0.15477		0.08241	0.3485	1.00205	0.79365	0.95787
	0.60518	1.00177	0.13029		0.05312	0.40381	1.00209	0.50759	0.92277
	0.61996	--	0.09947		0.07303	0.3535	0.99933	0.50759	0.97974
	0.60013		0.03544		0.1613	0.35094	1.0016	0.56406	0.99445
	0.54472		0.16123		0.19598	0.21135	0.99994		0.98828
	0.6088		0.04836		0.13319	0.16457	1.00054		0.9828
	0.58578		0.01291		0.01682	0.29863	1.00181		0.96638
	0.56282		0.21652		0.15248	0.41588	1.00501		0.95209
	0.60603		0.08092		0.01143	0.39452	0.9991		0.96819
	0.60406		0.15304		0.0741	0.34108	1.00648		0.97868
	0.56747		0.28159		0.13089	0.13821	1.0014		1.02129
	0.62801		0.15856		0.19045	0.34714	1.0023		0.9856
	0.72351		0.18507		0.08245	0.20759	1.02021		0.99401
	0.56943		0.12912		0.01177	0.19988	1.00085		0.9715
	0.659		0.09437		0.06416	0.34131	1.00767		0.98101
	0.58139		0.13344		0.07799	0.30011			0.98656
	0.58081		0.23207		0.11996	0.38865			0.95662
	0.5707		0.2825		0.01847	0.34993			0.84985
	0.57588		0.08309		0.16428	0.42838			0.99907
	0.5678		0.22702		0.10936	0.22091			0.9785
	0.65402		0.27041		0.1595	0.13208			0.99226
	0.7725		0.01932		0.12203	0.29564			0.98821
	0.75075		0.04138		0.12214	0.37232			0.95942
	0.77173		0.03432		0.15277				0.99343
	0.55651		0.08316		0.11473				0.99287
	0.82936		0.08238		0.0659				0.97588
	0.63173		0.08961		0.07594				0.99113
	0.65826		0.20705		0.0203				0.98257
	0.58964		0.19331		0.11491				0.99507
	0.66365		0.06133		0.04237				0.98682
	0.58841		0.29183						0.97934
	0.72313		0.06196						0.9139
	0.6522		0.12805						0.99476
	0.6619		0.06966						0.97231
	0.63614		0.41009						0.99827
	0.79353		0.02822						0.93329
	0.82051		0.25102						0.98113
			0.09284						0.93141
			0.16493						0.95332
			0.07722						1.0019
			0.15409						0.97319
			0.34441						0.97453
			0.19496						0.9636
			0.05469						0.98108
			0.26384						0.96615
			0.34413						0.9628
			0.40558						0.97344
			0.12373						0.98048
			0.22859						0.99857
			0.12259						0.89929
			0.13769						0.98699
			0.40342						0.98901
			0.10888						0.9491
			0.24509						0.95817
			0.19022						0.97959
			0.14696						0.96863
			0.13647						0.95194
			0.07095						0.97062
			0.1626						0.97356
			0.18505						0.96126
			0.05336						0.99883
			0.09246						0.96014
			0.24718						0.99543
			0.20353						0.99016
			0.0112						0.95954
			0.31972						0.99547
			0.06762						0.9953
			0.2299						0.99266
			0.28684						0.97156
			0.17219						0.9932
			0.11969						0.98941
									0.98153
									1.01141
									0.98036
									0.96089
									0.98013
									0.97564
									0.94277

## Sheet: Figure 3C
	WT	Y745H	D796A	M801A	D802A	G805A	R842H	H845A	F847A	V849M	R851K	R851Q	Q861A
	1573.2	1929.71	2409.34	4101.09	1064.83	5173.47	3683.2	1908.6	98.8061	4601.69	1979.41	2505.11	5142.26
	806.501	735.576	1404.74	1800.52	1542.13	3186.19	1796.5	731.34	126.845	1977.22	1123.11	2906.58	3933.8
	1546.6	2202.97	3298.33	3455.73	1086.97	442.209	1311.48	1011.57	109.73	4272.56	2233.82	2476.14	2398.99
	1610.5	1268.11	990.139	157.536	606.229	3615.56	3631.97	149.855	95.2681	4562.93	1070.54	1734.83	2273.31
	1503.19	2568.86	800.603	234.834	547.087	1063.56	2238.15	804.666	31.9124	2437.04	388.564	1671.86	2065.77
	1166.33	308.713	1991.82	636.82	1032.05	1662.59	3529.67	1989.4	95.3969	4084.21	1555.64	1560.09	2002.54
	652.218	1530.16	2841.94	2246.24	3091.94	342.794	1307.9	2561.72	88.6797	1251.65	1752.97	3348.29	1930.03
	1645.26	2422.82	2245.93	2476.24	1158.95	2103.51	3595.43	1301.01	215.658	4138.8	2112.78	1377.94	1347
	1375.6	1666.61	1500.22	146.649	355.245	2140.62	2403.31	3888.88	130.608	3933.8	937.593	929.886	1253.27
	1219.66	1489.67	581.971	1042.47	1722.38	622.49	1270.61	1933.59	141.925	223.419	1603.89	589.274	1018.77
	1882.12	1000.94	1604.9	3745.12	2053.81	829.107	721.983	2084.84	127.341	829.116	2998.1	668.471	970.638
	1087.4	4481.76	2734.07	2534.34	1725.05	636.44	2669.64	120.333	103.839	3383.01	1649.74	992.948	923.799
	1446.21	266.762	4088.22	2837.09	2922.71	268.196	850.487	2810.75	94.4484	1183.61	522.341	632.173	874.268
	310.311	1319.69	2306.69	1832.98	1422.03	281.288	2726.87	567.534	92.2224	2000.61	1982.37	1645.5	873.664
	1292.21	1797.17	3168.77	1582.28	1064.47	370.424	1748.66	4229.35	85.9319	269.276	2787.39	995.296	733.386
	1713.77	1928.9	3631.86	2756.38	1364.28	1953.41	3595.28	778.069	150.902	755.757	970.814	910.656	692.469
	1453.37	1543.57	2389.82	1478.15	4921.34	311.335	774.336	217.348	147.227	2616.92	1798.92	77.5037	659.754
	807.206	783.277	5169.47	1526.53	1256.1	2373.64	5970.98	320.588	152.853	3733.72	1293.7	88.8068	652.783
	259.761	1436.84	2324.77	1943.98	344.129	1423.57	2370.42	1128.24	151.105	2460.35	870.583	2313.52	649.332
	1535.72	340.837	477.654	2186.82	2085.84	836.74	951.587	2184.91	74.1457	2032.6	1860.45	1730.79	618.625
	2261.42	1650.38	1268.68	2305.79	1336.85	563.248	1767.66	238.187	192.179	813.051	2078.7	378.693	596.207
	1233.09	2399.13	480.228	721.963	3184.28	881.218	1048.23	206.564	109.775	208.157	1758.72	1767.29	594.515
	1902.23	1967.86	5168.64	1309.95	536.184	1395.32	2956.25	2395.39	132.92	3081.56	1331.69	1062.96	589.664
	1339.16	1166.7	2812.23	1587.34	789.355	387.472	1658.13	1628.28	62.6477	410.56	2852.35	1173.74	587.25
	1922.77	797.05	671.252	1647.62	2257.23	863.123	1991.33	131.137	90.493	1187.27	3778	2059.42	583.25
	664.562	1436.56	959.956	1831.83	1131.5	469.204	3860.56	738.38	74.7286	1925.41	2076.17	1146.42	578.281
	2004.65	1434.86	3879.4	1478.15	2360.07	918.275	856.507	347.557	143.348	2276.6	1818.77	2832.76	573.93
	2124.05	1828.58	3043.94	1854.52	2417	1009.4	1423.19	211.942	296.176	1282.13	912.472	3727.09	541.482
	1350.56	870.617	4447.95	1826.68	2544.02	1816.59	5447.36	368.881	99.5128	3800.82	214.584	1208.62	537.985
	1655.07	830.672	442.094	2080.72	1777.79	725.228	769.794	863.807	199.75	3300.77	1832.97	1819.27	531.202
	1537.49	1145.57	4565.36	1520.47	2061.22	829.377	987.421	376.341	131.716	3139.2	2046.48	74.8005	525.705
	1472.49	464.12	1788.43	915.365	2226.96	853.465	2548.19	1274.44	65.7073	1336.95	550.122	--	523.774
	913.119	1407.48	2209.34	428.701	656.459	2988.67	2906.95	1145.51	96.7295	2805.01	3028.63	--	520.925
	2115.93	648.305	2561.24	828.361	2412.11	935.567	872.424	3030.19	115.129	5530.52	1535.21	--	519.507
	415.369	1958.85	1912.65	--	2340.02	312.916	630.099	1585.72	111.189	1248.05	2211.74	--	410.454
	565.33	1419.98	1022.73	--	3008.28	207.617	2442.96	558.149	104.554	276.592	854.987	--	403.43
	716.933	971.429	4180	--	1530.56	1391.09	3772.87	1065.77	112.456	650.633	2258.01	--	379.886
	1820.91	2054.03	1276.17	--	265.132	1026.66	6908.35	894.508	148.832	2646.26	1970.22	--	369.41
	1761.99	786.239	986.95	--	1832.93	790.7	1268.91	1895.95	112.837	469.244	1499.67	--	353.038
	1800.22	1113.74	3268.94	--	1037.27	1448.4	3005.41	108.615	118.221	3779.79	2888.03	--	327.445
	1182.94	3334.84	2921.93	--	265.508	594.804	963.331	171.74	122.782	2906.86	921.415	--	321.959
	2168.34	485.673	930.717	--	1804.3	770.964	1628.6	849.102	142.578	800.698	2419.45	--	284.872
	1196.82	2412.91	5222.18	--	1188.57	624.343	5061.68	1164.8	163.374	209.109	3176.4	--	275.433
	2226.17	1132.63	555.551	--	2633.07	1187.65	2150.01	1627.92	82.5806	3856.39	807.856	--	244.324
	1651.83	1847.25	705.723	--	1555.2	569.977	2884.86	1827.49	106.468	450.717	1578.39	--	243.956
	1427.04	1059.3	2593.67	--	1463.62	223.105	613.934	430.252	108.558	1163.81	1710.86	--	222.222
	2174.61	471.893	2075.8	--	2464.72	1036.24	3149.65	887.222	177.136	257.261	1632.35	--	207.596
	219.202	1604.62	3169	--	703.611	991.734	1795	833.016	149.069	5777.46	1783.81	--	203.014
	2215.57	887.681	1509.9	--	2511.88	1075.3	2148.5	2170.9	123.42	1548.12	2320.97	--	182.107
	551.048	2245.32	1573.85	--	234.498	532.809	1678.51	582.067	160.37	662.648	--	--	158.429
	1268.61	1634.98	1561.74	--	1226.09	1414.94	4442.84	1451.19	199.678	2772.56	--	--	228.627
	2128.81	1455.12	2781.46	--	2452.9	1029.64	1653.9	645.276	143.283	4700.23	--	--	238.97
	2390.66	1486.8	1607.08	--	2981.15	1277.53	957.116	1640.91	91.1243	2449.6	--	--	255.291
	3155.62	654.319	2620.34	--	616.798	2003.26	477.492	1250.14	199.086	1683.87	--	--	299.757
	5694.42	880.847	1994.55	--	390.045	1929.71	1980.96	1184.34	122.184	5346.49	--	--	542.813
	2977.51	1500.37	624.973	--	364.563	1873.11	482.901	1167.03	185.096	873.408	--	--	617.462
	2927.68	1742.39	3029.16	--	3007.79	1366.37	433.938	993.982	184.728	2005.15	--	--	624.209
	2418.9	1283.57	1374.97	--	2907.23	1269.46	1282.16	1486	183.619	3478.98	--	--	843.362
	2343.45	1498.17	848.355	--	241.891	1668.35	1460.39	950.431	146.325	2963.45	--	--	1084.51
	2706	572.954	3941.3	--	1911.05	1477.13	1314.25	2256.01	178.594	--	--	--	1700.62
	4108.26	628.153	3012.86	--	3427.06	1995.19	273.702	1115.16	97.821	--	--	--	2008.41
	2565.24	--	835.437	--	608.415	1983.04	508.488	1115.16	98.0621	--	--	--	2349.82
	5257.97	--	858.328	--	552.785	1553.71	1416.66	1062.08	144.172	--	--	--	2678.8
	3021.99	--	4135.04	--	2061.81	2292.83	1634.33		176.515	--	--	--	2814.17
	2998.36	--	2845.87	--	1874.44	1590	590.05		176.396	--	--	--	3849.83
	4372.74	--	2481.29	--	3794.81	1735.53	431.044		173.842	--	--	--	4447.03
	3924.26	--	2681.95	--	971.633	2201.17	965.181		105.278	--	--	--	--
	2628.21	--	977.47	--	4139.81	1968.73	1869.98		106.203	--	--	--	--
	3315.95	--	1933.48	--	2305.69	3603.21	1124.41		124.397	--	--	--	--
	2663.95	--	3643.35	--	300.458	2347.35	1244.72		142.529	--	--	--	--
	4510.2	--	1055.71	--	885.502	1495.1	357.853		168.307	--	--	--	--
	2752.63	--	3459.31	--	528.567	2166.64	561.257		167.631	--	--	--	--
	6565.73	--	2604.62	--	1596.92	1863.76	1600.15		110.023	--	--	--	--
	3212.98	--	2298.43	--	1025.45	1268.26	1322.51		110.392	--	--	--	--
	2989.87	--	1583.64	--	3441.38	1475.86	--		164.651	--	--	--	--
	4624.77	--	1151.96	--	1899.87	1203.43	--		111.417	--	--	--	--
	3762.8	--	3461.12	--	823.485	1552.38	--		112.322	--	--	--	--
	3428.77	--	2587.07	--	351.211	2401.07	--		163.43	--	--	--	--
	2569.97	--	2477.22	--	2759.33	3012.38	--		112.559	--	--	--	--
	4070.56		2100.63	--	3285.78	2455.61	--		142.235	--	--	--	--
	3187.6		1668.16	--	2682.67	2587.78	--		141.994	--	--	--	--
	7541.1		2565.28	--	3543.28	3143.56	--		115.764	--	--	--	--
	2785.56		3496.68	--	1050.68		--		149.111	--	--	--	--
	4839.09		3349.52	--	1213.86		--		118.226	--	--	--	--
	2328.38		1858.32	--	1068.16		--		119.355	--	--	--	--
	2550.37		3335.43	--	1868.98		--		120.799	--	--	--	--
	2322.22		644.174		1148.62		--		141.896	--	--	--	--
	2597.58		2946.06		1599.69		--		139.744	--	--	--	--
	3434.47		1017.94		1437.03				123.294	--	--	--	--
	3591.88		2855.06		--				137.08	--	--	--	--
	3472		1687.87		--				162.682	--	--	--	--
	3907.3		2683.98		--				124.944	--	--	--	--
	3586.29		1722.4		--				126.793	--	--	--	--
	3853.87		1646.28						163.26	--	--	--	--
	3722.43		1076.68						134.383	--	--	--	--
	--		3067.61						129.79	--	--	--	--
	--		1950.87						136.958	--	--	--	--
	--		3222.92						130.806	--	--	--	--
	--		3111.53						155.391	--	--	--	--
			2427.43						132.321		--	--	--
			2876.4						132.547		--	--	--
			1494.07						153.799		--	--	--
			3270.63						133.557		--	--	--
			2330.46						136.645		--	--	--
			1850.8						88.5118		--	--	--
			907.252						88.2144		--	--	--
			3469.26						200.611		--	--	--
			2869.61						178.987		--	--	--
			4759.91						81.726		--	--	--
			1861.36						77.3808		--	--	--
			2487.75						76.2536		--		--
			3857						202.342		--		--
			1677.15						220.821		--		--
			5149.06						73.8733		--		--
			3117.91						67.774		--		--
			1548.5						66.9258		--		--
			532.739						225.667		--		--
			462.146						64.5786		--		--
			4370.42						239.029		--		--
			5022.76						62.6412		--		--
			4216.71						61.7558		--		--
			4441.55						60.1935		--		--
			509.189						57.1501		--		--
			4585.91						55.7966		--		--
			5180.22						55.5967		--		--
			5462.75						54.362		--		--
			5635.46						53.2465		--		--
			1136.25						51.6795		--		--
			1153.37						50.3339		--		--
			4690.34						47.1484		--		--
			--						44.2565		--		--
			--						44.0814		--		--
			--						41.3131		--		--
			--						40.515		--		--
									39.7555		--		--
									39.5887		--		--
									39.1987		--		--
									39.1806		--		--
									38.5934		--		--
									37.6423				--
									37.5845				--
									37.3788				--
									36.9507				--
									36.5884				--
									36.4433				--
									35.99				--
									34.8158				--
									269.193				--
									26.7514				--
									26.5243				--
									25.4018				--
									24.9606				--
									24.1373				--
									23.0616
									22.5418
									18.5933

## Sheet: Figure 3E
	WT	D796A	D802A	G805A	V849M	Q861A
	0.56287	0.13696	0.11284	0.30091	0.90842	0.07295
	0.7423	0.32971	0.21155	0.13942	0.8981	0.0312
	0.54525	0.2281	0.14828	0.24096	0.8145	0.16869
	0.4651	0.10537	0.0761		0.9823
	0.4582	0.15267	0.1923
