# Supplementary material for: Direct modulation of TRPM8 ion channels by rapamycin and analog macrolide immunosuppressants
Source: eLife. 2025 Sep 30;13:RP97341. doi: 10.7554/eLife.97341 (PMC12483518; doi:10.7554/eLife.97341)
Supplement: Figure 5—source data 1. [file elife-97341-fig5-data1.xlsx]

## Sheet: Figure 5C - currents
	I @ +120 mV (pA)		I @ -120 mV (pA)		I @ +120 mV (pA)		I @ -120 mV (pA)		I @ +120 mV (pA)		I @ -120 mV (pA)
	Control before UV flash	Control after UV flash	Control before UV flash	Control after UV flash	Rapamycin before UV flash	Rapamycin after UV flash	Rapamycin before UV flash	Rapamycin after UV flash	Icilin before UV flash	Icilin after UV flash	Icilin before UV flash	Icilin after UV flash
	1590	1480	-20	-20	7850	7620	-520	-590	2000	2500	-40	-50
	2760	2750	-25	-25	9065	8712	-620	-610	5460	7720	-33	-130
	1650	1750	-340	-347	14707	14316	-2500	-2350	13750	17460	-350	-1250
	1510	1612	-580	-570	12250	10850	-1950	-2050	8156	13500	-390	-965
	4550	4490	-222	-235					6920	10480	-850	-1350
									8581	10529	-130	-200

## Sheet: Figure 5D - fold change
	I @ +120 mV (pA)	I @ -120 mV (pA)	I @ +120 mV (pA)	I @ -120 mV (pA)	I @ +120 mV (pA)	I @ -120 mV (pA)
	Control fold change after UV flash	Control fold change after UV flash	Rapamycin fold change after UV flash	Rapamycin fold change after UV flash	Icilin fold change after UV flash	Icilin fold change after UV flash
	0.93082	1	0.9707	1.13462	1.25	1.25
	0.99638	1	0.96106	0.98387	1.41392	3.93939
	1.06061	1.02059	0.97341	0.94	1.26982	3.57143
	1.06755	0.98276	0.88571	1.05128	1.65522	2.47436
	0.98681	1.05856			1.51445	1.58824
					1.22701	1.53846
