# Supplementary material for: Direct modulation of TRPM8 ion channels by rapamycin and analog macrolide immunosuppressants
Source: eLife. 2025 Sep 30;13:RP97341. doi: 10.7554/eLife.97341 (PMC12483518; doi:10.7554/eLife.97341)
Supplement: Figure 6—source data 1. [file elife-97341-fig6-data1.xlsx]

## Sheet: Figure 6E - Effect of Everolimu
pretreatment:	vehicle	Everolimus		vehicle	Everolimus
agonist:	Menthol	Menthol		Rapamycin	Rapamycin
	0.64324	0.77643		0.58658	0.20835
	0.71749	0.72701		0.59448	0.26015
	0.69621	0.77069		0.65188	0.30206
	0.59733	0.62752		0.62382	0.36313
	0.66728	0.71959		0.67493	0.49384
	0.63283	0.63343		0.66229	0.47727

## Sheet: Figure 6B - Effect of Rapalogs
	Rapamycin	Everolimus	Zotarolimus	Ridaforolimus	Temsirolimus	FK506	Ascomycin	Pimecrolimus	2-methoxy-CHol	Vehicle
	0.867324	0.0647016	0.247615	0.0701806	-0.0143931	0.658662	0.24196	0.00961483	-0.264323	0.000700047
	0.818653	0.096297	0.154505	0.101846	0.0288043	0.509973	0.214622	0.0345777	-0.131064	0.00287104
	0.864215	0.0389831	0.191304	0.105002	0.0160065	0.609808	0.22132	0.0423218	-0.0738849	-0.000373458
	0.87282	0.0262141	0.115992	0.103932	0.00484201	0.219348	0.228502	0.0208183	0.105876	0.00496335
	0.849831	0.0147573	0.0893587	0.0874241	0.0099178	0.677574	0.242292	0.0159269	0.0275482	0.00643338
	0.864758	0.0435776	0.113274	0.0686733	0.00173358	0.550766	0.228534	0.0130605	0.0425874	0.00109688
	0.655379	0.0443638	0.0955955	0.0566129	0.00623556	0.641911	0.245321	0.0148125		0.00409891
	0.746717	0.0510611	0.112308	0.0847538	0.045398	0.550882	0.248162	0.0136319		0.00882229
	0.765935	0.0661312	0.077297	0.123975	0.00069475	0.807523	0.182538	0.0109465		-0.0043135
	0.795605	0.084289	0.0973603	0.0928718	0.00862488	0.664134	0.265847	0.0159842		-0.00362894
